# Supplementary material for: Transcriptomic responses of hypothalamus to acute exercise in type 2 diabetic Goto-Kakizaki rats
Source: PeerJ. 2019 Sep 24;7:e7743. doi: 10.7717/peerj.7743 (PMC6764357; doi:10.7717/peerj.7743)
Supplement: Table S3 [file peerj-07-7743-s003.xlsx]

## Sheet: GK vs. W DEGs
Genes differentially expressed in hypothalamus of GK and Wistar rats
Ensembl ID	Gene	logFC	logCPM	PValue	FDR
ENSRNOG00000000040	RGD1304622	-0.976676	2.3796	3.85134e-06	0.000292334
ENSRNOG00000000167	Alas2	1.57038	4.40953	7.0531e-05	0.00336079
ENSRNOG00000000172	Sqrdl	0.877393	3.8412	1.65769e-05	0.00100158
ENSRNOG00000000204	Syncrip	0.300851	5.47388	0.000609925	0.0179704
ENSRNOG00000000233	Grm6	1.75501	1.13962	5.59514e-11	9.28731e-09
ENSRNOG00000000386	Pbld1	-1.58911	2.41266	3.94574e-17	1.10371e-14
ENSRNOG00000000398	Zufsp	-0.470023	4.84973	0.00017875	0.00710531
ENSRNOG00000000443	C4a	-0.984119	5.28655	0.000850862	0.0234103
ENSRNOG00000000480	Phf1	-0.401507	5.838	0.00203371	0.0445849
ENSRNOG00000000525	Pi16	-0.419312	4.52598	0.000955606	0.0254575
ENSRNOG00000000542	Dnah8	-2.34235	1.69575	5.7485e-21	2.06741e-18
ENSRNOG00000000576	Anapc16	0.482194	3.76017	0.000263888	0.00937888
ENSRNOG00000000586	Gtf3c6	0.292828	4.92533	0.0022578	0.0481016
ENSRNOG00000000640	Egr2	-2.52716	2.31824	0.00146972	0.0354367
ENSRNOG00000000657	Nek7	-0.392608	4.58975	3.88997e-05	0.0020985
ENSRNOG00000000699	Selplg	-0.787321	4.17258	4.40541e-17	1.18828e-14
ENSRNOG00000000700	Tmem119	-0.996208	4.29365	1.10829e-11	1.99294e-09
ENSRNOG00000000723	RT1-CE5	0.452212	3.90273	0.00218306	0.0467318
ENSRNOG00000000778	Znrd1as1	-0.74858	3.12578	3.82718e-10	6.02182e-08
ENSRNOG00000000795	RT1-N3	-1.26598	2.64342	5.9962e-18	1.74178e-15
ENSRNOG00000000831	Gtf2h4	-0.4454	3.55829	0.000118129	0.00512741
ENSRNOG00000000961	Glt1d1	0.345721	4.97494	0.000311727	0.010629
ENSRNOG00000000963	Tmem132c	0.712701	3.5783	5.77451e-10	8.8105e-08
ENSRNOG00000001036	Rsph10b	-0.526287	4.93057	0.000200446	0.0077247
ENSRNOG00000001066	Itih2	1.85946	0.416927	1.92926e-06	0.000154188
ENSRNOG00000001123	RGD1562310	-0.434659	4.35851	0.0002063	0.00790905
ENSRNOG00000001157	Umodl1	1.8298	0.223111	3.06663e-09	4.28903e-07
ENSRNOG00000001242	Gstt3	-0.532844	6.24055	3.80852e-05	0.00207681
ENSRNOG00000001251	Grifin	1.75226	4.10274	2.79998e-08	3.25336e-06
ENSRNOG00000001324	Asmt	-1.14177	0.568744	3.65733e-05	0.00200887
ENSRNOG00000001325	Il3ra	-0.527464	3.85962	5.22833e-06	0.000377866
ENSRNOG00000001346	Cops6	0.33673	6.68238	0.000968713	0.0256108
ENSRNOG00000001376	Mettl7a	0.660064	6.8982	2.20622e-14	5.37498e-12
ENSRNOG00000001426	Prkrip1	-0.298299	5.41111	0.000260333	0.00929882
ENSRNOG00000001441	Tmem120a	-0.37672	4.97651	5.94584e-05	0.00290653
ENSRNOG00000001493	Kptn	0.396052	4.84557	7.83743e-06	0.000526153
ENSRNOG00000001807	Sspn	-0.644027	4.73961	1.38377e-09	2.00979e-07
ENSRNOG00000001817	Tm7sf3	0.227607	5.9063	0.00178207	0.0404784
ENSRNOG00000001845	Top3b	-0.520427	5.55092	0.000953307	0.0254412
ENSRNOG00000001851	Far2	1.80481	5.35426	0.00138946	0.0338513
ENSRNOG00000001885	Trmt2a	-0.37462	4.74178	0.000119304	0.00516058
ENSRNOG00000001963	Mx2	1.37936	6.01637	4.73057e-20	1.52032e-17
ENSRNOG00000002105	Cdc7	-0.681526	3.17057	0.000326635	0.0111122
ENSRNOG00000002134	LOC103690086	2.60631	1.62689	1.25101e-24	5.90517e-22
ENSRNOG00000002145	Tmprss7	-1.19144	1.26567	1.17747e-06	0.000102667
ENSRNOG00000002225	Scarb2	0.399238	7.61449	4.40538e-07	4.2656e-05
ENSRNOG00000002342	Aldh3a2	0.923527	6.76034	0.00105678	0.0274738
ENSRNOG00000002418	Tgfb2	-0.518702	4.25089	0.000499727	0.0156373
ENSRNOG00000002480	Gpr137b	0.453295	3.70092	0.000124507	0.0053277
ENSRNOG00000002512	Gpatch2	-0.410731	3.18542	0.000481685	0.015158
ENSRNOG00000002781	Kdsr	1.66329	4.96769	0.000973226	0.0256108
ENSRNOG00000002793	Sstr2	0.414344	3.58708	0.00175941	0.0401448
ENSRNOG00000002876	Eef2kmt	0.652429	2.33441	2.9704e-05	0.00166512
ENSRNOG00000002906	Nr1i2	1.7769	0.25085	1.21367e-05	0.000763854
ENSRNOG00000002946	Socs3	-1.83345	1.8105	0.000432909	0.0140023
ENSRNOG00000002976	Maats1	-0.947695	3.25953	2.49902e-08	2.92618e-06
ENSRNOG00000003028	Dnah17	-0.972266	0.48155	0.000907128	0.0246
ENSRNOG00000003108	Acbd4	-0.561855	4.68094	1.18574e-10	1.92588e-08
ENSRNOG00000003256	Ccng1	0.627323	7.27139	1.19645e-06	0.000102684
ENSRNOG00000003537	Spta1	1.02656	2.61316	3.27579e-07	3.19231e-05
ENSRNOG00000003585	Sytl5	-0.556599	3.09146	0.00233957	0.0493466
ENSRNOG00000003606	AABR07014550.1	5.21534	0.546468	3.39341e-24	1.50757e-21
ENSRNOG00000003674	Pir	0.539952	4.55729	5.23344e-05	0.00262628
ENSRNOG00000003738	Ush2a	-1.10336	2.80415	1.43725e-08	1.79419e-06
ENSRNOG00000003745	Atf3	-2.56597	2.27959	0.000131162	0.00558086
ENSRNOG00000003759	Galc	0.398036	3.82954	0.00121023	0.0305185
ENSRNOG00000003773	Hmox2	-0.800857	5.96575	0.00187533	0.041888
ENSRNOG00000003881	Nit1	0.365192	5.53471	0.00014927	0.00621137
ENSRNOG00000004016	Msl3	-0.293989	5.48711	0.000471864	0.0149737
ENSRNOG00000004027	Aldh9a1	0.225564	6.25074	0.00114719	0.0292515
ENSRNOG00000004091	Cwc25	0.520515	4.34677	3.64839e-09	4.96477e-07
ENSRNOG00000004110	Trib2	0.359575	5.527	3.87305e-06	0.000292512
ENSRNOG00000004161	Mtif2	0.430468	4.68866	6.94471e-06	0.000476817
ENSRNOG00000004179	Nts	0.938035	4.8041	0.00138598	0.0338513
ENSRNOG00000004279	Adgra3	-0.273556	4.89871	0.00110871	0.0284767
ENSRNOG00000004398	Pkhd1l1	-1.30815	1.3187	0.000609681	0.0179704
ENSRNOG00000004430	Cep131	-0.649927	5.90152	4.16331e-05	0.00223003
ENSRNOG00000004443	Sptlc3	6.53942	6.01402	9.68615e-07	8.60643e-05
ENSRNOG00000004451	Mc3r	0.526949	2.63472	0.00192174	0.0427508
ENSRNOG00000004458	Ston2	0.600453	3.81686	0.000888596	0.0241842
ENSRNOG00000004737	Cd48	0.729651	5.29161	9.4321e-05	0.00426562
ENSRNOG00000004754	Tc2n	3.98489	3.77728	4.71384e-06	0.000345644
ENSRNOG00000004899	Kcns3	0.991933	2.36548	0.000164641	0.00670322
ENSRNOG00000004903	Ebp	0.463831	3.91971	0.00178884	0.0405711
ENSRNOG00000005175	Sgpp1	0.968002	6.31342	0.000816206	0.0226472
ENSRNOG00000005177	Tp53i3	-1.29194	2.78725	1.38281e-12	2.71264e-10
ENSRNOG00000005229	Sec16b	-1.3101	2.32427	0.000232101	0.00861399
ENSRNOG00000005256	Zc3h15	0.390724	6.86878	7.11162e-06	0.000486068
ENSRNOG00000005350	Pwp1	0.41422	4.31298	0.000167763	0.00679372
ENSRNOG00000005387	Rbm3	-0.375477	6.33867	0.00162647	0.0383273
ENSRNOG00000005513	Srsf5	-0.411196	8.16621	2.74758e-05	0.00154859
ENSRNOG00000005690	Lmcd1	-0.66103	3.23455	5.06866e-05	0.0025606
ENSRNOG00000005727	Galnt3	1.728	0.784358	0.00163512	0.0384712
ENSRNOG00000005788	Cdk5rap2	-0.449696	5.02013	0.000111658	0.00494602
ENSRNOG00000005801	Stx17	-0.468299	3.12134	0.000685516	0.0198366
ENSRNOG00000005807	Ptpn7	-0.640395	1.5177	0.0018439	0.0414555
ENSRNOG00000005826	AABR07065923.1	3.97789	0.460126	4.56108e-19	1.43531e-16
ENSRNOG00000005850	Gdap1	0.441508	7.12194	7.68877e-05	0.00358956
ENSRNOG00000005874	Tle2	-0.783633	4.14515	0.00148846	0.0357444
ENSRNOG00000005908	Dmtf1	0.340172	6.26999	0.000804981	0.022434
ENSRNOG00000005998	Smoc1	-0.613953	4.75886	2.18654e-08	2.6006e-06
ENSRNOG00000006019	G0s2	2.07206	2.91449	0.000703891	0.020252
ENSRNOG00000006060	Matn2	-0.974897	5.28474	1.46824e-14	3.6963e-12
ENSRNOG00000006131	Mettl2b	-1.73224	2.36486	2.24554e-18	6.78379e-16
ENSRNOG00000006237	Gpr37l1	-0.452424	8.18746	0.000246751	0.00897377
ENSRNOG00000006334	Txndc16	0.61821	5.8876	5.26853e-13	1.10529e-10
ENSRNOG00000006611	Nostrin	0.987381	3.50891	5.41696e-10	8.34931e-08
ENSRNOG00000006779	Crot	0.964262	5.27013	1.92923e-13	4.28545e-11
ENSRNOG00000006795	Apmap	0.521977	5.40421	0.000668272	0.0193747
ENSRNOG00000006844	Dnajc14	0.373518	5.77059	2.16525e-05	0.00126768
ENSRNOG00000006893	Ppm1k	0.6212	5.46606	6.45862e-08	7.17334e-06
ENSRNOG00000006929	Hnrnpll	-0.332634	5.52852	1.23684e-05	0.000772003
ENSRNOG00000006949	C1qbp	0.372711	6.41127	2.68837e-05	0.00152089
ENSRNOG00000006963	Ctse	6.17819	5.05623	9.65306e-07	8.60643e-05
ENSRNOG00000006983	Nr2c1	-0.822284	4.91573	6.4124e-06	0.000450509
ENSRNOG00000007041	Abcg2	0.443783	5.0251	0.000804389	0.022434
ENSRNOG00000007060	Plin2	1.48208	5.97942	0.00182233	0.0412071
ENSRNOG00000007338	Fbln2	-0.334386	5.30777	0.00218422	0.0467318
ENSRNOG00000007433	Cyb561	-0.725227	5.6118	2.16554e-11	3.75982e-09
ENSRNOG00000007454	Aloxe3	-0.813607	3.78836	5.53088e-05	0.00273915
ENSRNOG00000007622	Arrdc1	-0.400116	3.90716	0.000292727	0.0101182
ENSRNOG00000008039	Cul5	0.40503	5.95236	6.47371e-05	0.00311418
ENSRNOG00000008106	Shmt2	-0.266598	5.06412	0.000347371	0.0116255
ENSRNOG00000008129	Pla2r1	1.79532	1.2078	0.000443235	0.0143057
ENSRNOG00000008138	RGD1309108	-0.78672	3.31824	5.68504e-08	6.36093e-06
ENSRNOG00000008180	Lyn	-0.348865	4.27268	0.0018498	0.0414557
ENSRNOG00000008257	Mfap2	-0.540481	3.29952	0.00134608	0.0330609
ENSRNOG00000008291	Thumpd2	-0.667814	3.25278	0.000112958	0.00496413
ENSRNOG00000008334	Crocc	-0.619234	5.39883	0.00138923	0.0338513
ENSRNOG00000008373	Colec11	1.98591	2.2114	1.03568e-28	6.25755e-26
ENSRNOG00000008529	Foxs1	-1.08424	0.949195	0.000347879	0.0116255
ENSRNOG00000008552	P2rx3	0.951653	1.37744	7.41522e-05	0.00348931
ENSRNOG00000008596	Ttll9	-0.812071	3.57038	2.86007e-06	0.000222688
ENSRNOG00000008688	Usp45	-0.351223	5.09446	0.0004795	0.0151208
ENSRNOG00000008754	Flvcr2	-0.861727	1.82917	3.77328e-05	0.00206505
ENSRNOG00000008798	Pipox	-1.80577	0.761034	7.25163e-19	2.23543e-16
ENSRNOG00000008994	Arpc4	0.252049	6.84724	0.00240088	0.0499522
ENSRNOG00000009032	Ttll3	-0.802717	3.95817	0.00125126	0.0312919
ENSRNOG00000009096	Pon3	3.07651	2.09146	0.000357051	0.0118794
ENSRNOG00000009263	Ifi27	0.936476	6.58406	1.70627e-06	0.000139973
ENSRNOG00000009329	Nr1d1	-0.540709	6.21074	0.000221735	0.00833163
ENSRNOG00000009333	Osgep	-0.359266	4.4911	0.00160826	0.0379574
ENSRNOG00000009336	Mapk15	-0.639765	3.56567	0.00105089	0.0273684
ENSRNOG00000009373	RGD1562690	-1.89642	2.80906	8.33276e-13	1.67822e-10
ENSRNOG00000009401	Lmo2	0.346136	3.94472	0.002129	0.0460099
ENSRNOG00000009412	Lrch1	-0.377644	4.36429	0.00230966	0.0489992
ENSRNOG00000009433	Ccdc109b	0.975031	1.28946	0.000840074	0.0231557
ENSRNOG00000009434	RGD1310507	0.804776	2.29593	0.000610316	0.0179704
ENSRNOG00000009465	Sfrp2	0.734716	3.03409	0.000119746	0.00516058
ENSRNOG00000009487	Gpr160	0.709236	1.21754	0.00198225	0.0435988
ENSRNOG00000009563	Krt2	-0.881008	1.50801	0.000629651	0.0183963
ENSRNOG00000009629	Car2	0.561636	8.09878	0.00151293	0.0362169
ENSRNOG00000009734	Akr1b8	1.63383	3.75697	1.55138e-45	1.4646e-42
ENSRNOG00000009742	Rad52	-0.436861	3.33693	0.00157757	0.0374085
ENSRNOG00000009802	Fam124a	-1.62293	3.4986	1.09434e-27	5.69999e-25
ENSRNOG00000009848	Il18	0.503573	2.88575	0.00207383	0.0450722
ENSRNOG00000009945	Pls1	0.426737	5.27397	0.000753713	0.0213199
ENSRNOG00000010076	Pkp1	-2.78522	2.01963	1.65803e-28	9.63254e-26
ENSRNOG00000010090	Ccdc174	0.439797	4.30388	4.18258e-06	0.000309695
ENSRNOG00000010196	Glb1	-0.450769	5.04734	5.56603e-07	5.25468e-05
ENSRNOG00000010210	Slc7a11	-0.8257	7.79278	6.37649e-07	5.87298e-05
ENSRNOG00000010232	Enpp5	0.346071	8.43172	0.00198054	0.0435988
ENSRNOG00000010263	Cldn11	0.478775	9.30424	0.000352007	0.0117375
ENSRNOG00000010378	Slc4a5	-0.864279	1.17162	0.000292072	0.0101182
ENSRNOG00000010392	Nrg1	0.602736	3.18162	0.000514682	0.0159437
ENSRNOG00000010397	Agbl3	-0.888274	4.51066	9.366e-06	0.0006098
ENSRNOG00000010447	Tmod2	0.391864	6.43807	0.000100679	0.00448599
ENSRNOG00000010524	Cryab	0.76458	6.80521	6.24017e-05	0.00302108
ENSRNOG00000010608	Cep162	-0.553722	3.73806	0.000903798	0.0245537
ENSRNOG00000010625	Dnmt3b	-0.921369	0.415863	0.0014733	0.0354367
ENSRNOG00000010626	Sphk1	3.15804	3.51903	0.000570529	0.0171329
ENSRNOG00000010645	Lgals3	1.13358	3.85266	0.000201929	0.00776116
ENSRNOG00000010650	Plekhh1	-0.791781	6.35253	0.000428624	0.0139534
ENSRNOG00000010658	LOC103691744	0.711584	3.1764	4.66665e-06	0.000343852
ENSRNOG00000010666	Wisp2	1.45888	2.69953	4.00641e-06	0.000300895
ENSRNOG00000010706	Ccdc117	0.534786	4.39552	2.38493e-05	0.00136456
ENSRNOG00000010712	Terf2ip	-0.394455	6.6034	4.48099e-05	0.00238329
ENSRNOG00000010743	Fdxacb1	0.797102	2.16403	0.000177594	0.00707797
ENSRNOG00000010802	Ube3d	-1.66301	1.64328	1.17259e-17	3.34189e-15
ENSRNOG00000010853	Chrna7	-0.52641	4.72048	1.71263e-05	0.00103065
ENSRNOG00000010873	Pithd1	0.359438	7.1362	0.0015413	0.0367794
ENSRNOG00000010875	LOC691931	1.09009	0.337	4.25134e-05	0.00226913
ENSRNOG00000010882	Sptlc1	1.34338	6.3851	0.000997985	0.0261711
ENSRNOG00000010892	Ythdf2	0.34514	5.57923	4.72936e-05	0.00244647
ENSRNOG00000010917	Bmp5	-1.15152	2.24763	0.000707319	0.0203119
ENSRNOG00000011025	Trmt10a	0.668024	3.81943	1.07872e-06	9.47333e-05
ENSRNOG00000011027	Uba5	-0.422849	6.18721	5.02164e-08	5.70315e-06
ENSRNOG00000011146	Gyg1	0.517717	5.85178	0.00177077	0.0402824
ENSRNOG00000011150	Arsb	0.370562	7.63937	8.49898e-08	9.30269e-06
ENSRNOG00000011153	Il17ra	-0.730957	4.45421	1.63574e-06	0.000135757
ENSRNOG00000011205	Ccl3	-2.14809	0.588532	0.000120019	0.00516058
ENSRNOG00000011228	Layn	1.07606	3.06102	8.70385e-09	1.11417e-06
ENSRNOG00000011348	Snx14	-0.316945	6.23303	0.000380184	0.0125936
ENSRNOG00000011502	Col9a2	-0.784496	4.96653	0.00224418	0.047879
ENSRNOG00000011669	Gstcd	-0.605071	2.6491	0.000248749	0.00901043
ENSRNOG00000011830	Plekha3	0.280572	5.01762	0.000728316	0.020757
ENSRNOG00000011944	Snx10	0.371226	6.67803	0.000271313	0.00959762
ENSRNOG00000011992	Slc18a1	-1.43715	1.28149	8.48607e-05	0.0039114
ENSRNOG00000012049	Sox7	-0.850756	1.2166	0.00198295	0.0435988
ENSRNOG00000012051	Ncaph	-1.28327	0.922691	0.000529611	0.0162928
ENSRNOG00000012083	St6galnac2	-2.2344	0.771207	4.9271e-09	6.64498e-07
ENSRNOG00000012137	Ccdc84	-0.607918	3.43464	1.6146e-05	0.000983406
ENSRNOG00000012155	Sox15	1.97892	0.118097	1.74323e-09	2.50776e-07
ENSRNOG00000012215	Baiap2l2	-0.726753	1.14808	0.000869835	0.0238455
ENSRNOG00000012229	T	-1.00971	1.38873	0.000882932	0.0240734
ENSRNOG00000012258	Rras2	0.480629	4.54456	0.00172904	0.0396917
ENSRNOG00000012294	Heph	0.388559	4.89214	0.000619207	0.0181614
ENSRNOG00000012311	Slc35d3	-0.648243	3.62542	2.0144e-05	0.00119794
ENSRNOG00000012337	Pde1c	-0.643177	2.83295	2.91172e-06	0.000224396
ENSRNOG00000012394	Bcl2l13	0.314369	4.17377	0.000767428	0.0216269
ENSRNOG00000012404	Thrsp	3.93723	6.16687	3.45705e-05	0.00191277
ENSRNOG00000012414	Rhobtb3	-0.620541	4.6509	6.9122e-06	0.000476817
ENSRNOG00000012436	Adh6	4.0773	3.90468	7.42742e-06	0.000503099
ENSRNOG00000012440	Msra	0.656085	2.77125	4.93546e-05	0.00250168
ENSRNOG00000012524	Zfp91	0.280339	7.5123	0.00141252	0.0343577
ENSRNOG00000012557	Lgals5	4.07769	4.69824	9.30451e-22	3.60371e-19
ENSRNOG00000012651	Cwc22	-0.40994	4.55235	7.22474e-06	0.000491576
ENSRNOG00000012655	Adamts6	-1.07294	1.64998	0.000399603	0.0130933
ENSRNOG00000012681	Lgals9	0.695099	4.60217	0.00018933	0.00742815
ENSRNOG00000012684	Bloc1s2	0.745327	5.33179	0.000465591	0.014837
ENSRNOG00000012759	Col19a1	-1.19496	3.00266	0.00165418	0.0386786
ENSRNOG00000012821	Lect1	-2.92976	0.862387	2.2648e-05	0.00130075
ENSRNOG00000012843	Aspg	-1.38295	1.84358	0.00039557	0.0130176
ENSRNOG00000012853	Tk2	-0.403975	5.35257	0.00011674	0.0050964
ENSRNOG00000012929	Wsb1	-0.508976	7.73831	4.8439e-05	0.00247186
ENSRNOG00000012932	Ccdc146	-0.61694	3.16237	0.00022162	0.00833163
ENSRNOG00000012962	Nudt16	0.335283	3.87033	0.00198291	0.0435988
ENSRNOG00000012972	Alox5	-0.998454	2.6414	5.6084e-09	7.4969e-07
ENSRNOG00000013279	LOC681458	8.15454	7.10144	8.01905e-07	7.29685e-05
ENSRNOG00000013387	Tpcn2	-1.01158	3.46775	0.000167282	0.00679247
ENSRNOG00000013409	Gclm	0.323964	4.74655	0.000536864	0.0163825
ENSRNOG00000013463	Kcnj8	-0.797732	2.05962	0.000337013	0.0114139
ENSRNOG00000013521	Dhfr	0.495113	3.63614	3.39735e-05	0.00188666
ENSRNOG00000013766	Acaa2	-0.595145	4.9838	0.000469864	0.0149417
ENSRNOG00000013793	C1qtnf9	1.0484	1.21062	0.000801944	0.0224322
ENSRNOG00000013965	Noc3l	0.266134	4.65471	0.00235013	0.0494183
ENSRNOG00000013973	Lcn2	4.37817	0.48954	3.13258e-22	1.27886e-19
ENSRNOG00000014051	Pgrmc2	0.336132	6.82919	0.000244854	0.00893362
ENSRNOG00000014104	Myo5b	-0.550841	5.4408	0.000518347	0.0159788
ENSRNOG00000014117	Hmox1	1.22571	4.2845	6.02163e-07	5.58017e-05
ENSRNOG00000014178	Acad9	0.623722	5.73526	3.79352e-06	0.000289399
ENSRNOG00000014258	Rab32	-0.524305	2.9907	0.00239328	0.0499377
ENSRNOG00000014354	Cep95	-0.609368	4.71632	0.000446455	0.0143789
ENSRNOG00000014481	Adtrp	1.86182	1.91674	0.00182512	0.0412084
ENSRNOG00000014522	Mlycd	-1.07578	5.59943	2.99401e-22	1.25624e-19
ENSRNOG00000014650	Sema4g	-0.701518	5.67844	0.000582571	0.0173908
ENSRNOG00000014654	LOC691807	1.14038	6.88466	0.00112805	0.02888
ENSRNOG00000014673	Eri2	0.364836	3.95975	0.00170199	0.0392496
ENSRNOG00000014692	Mogat1	5.90784	3.60843	5.83457e-07	5.4402e-05
ENSRNOG00000014705	Rbm20	-1.07863	1.25444	0.00071086	0.0203363
ENSRNOG00000014766	Galt	-0.462324	4.64464	3.58737e-05	0.00197763
ENSRNOG00000014937	Lrrc71	-0.894014	3.34773	0.00028946	0.0100513
ENSRNOG00000014956	Slc11a1	0.940267	2.981	2.05675e-08	2.46565e-06
ENSRNOG00000015051	Golga7b	0.316876	6.27007	0.000970765	0.0256108
ENSRNOG00000015118	Cpped1	-0.428918	3.4479	9.8915e-05	0.00443356
ENSRNOG00000015157	Smtnl2	1.03301	1.66627	2.13971e-05	0.0012576
ENSRNOG00000015239	Ginm1	0.79102	4.75741	4.49813e-05	0.00238401
ENSRNOG00000015253	Hsf4	-0.546993	4.00377	0.000574255	0.0172106
ENSRNOG00000015334	Fcho2	0.410363	6.22149	1.41819e-06	0.000119675
ENSRNOG00000015403	Cd52	2.25191	0.667895	6.03687e-06	0.000428108
ENSRNOG00000015421	Slc27a3	-0.431208	4.57446	0.00181639	0.0411343
ENSRNOG00000015445	Mal	0.633999	8.96125	0.00186667	0.041772
ENSRNOG00000015450	Ppp1r16a	-0.438107	5.58928	2.88346e-06	0.000223358
ENSRNOG00000015546	MGC116121	-0.644797	4.48987	1.48812e-10	2.39129e-08
ENSRNOG00000015799	Nat8f1	-1.30454	2.76429	2.89144e-11	4.96309e-09
ENSRNOG00000015807	Pyroxd2	-0.82738	3.71183	2.1749e-07	2.19013e-05
ENSRNOG00000015867	Chst9	1.93659	1.26519	9.75172e-05	0.00438392
ENSRNOG00000015939	Ccdc25	0.412318	5.52499	2.64224e-06	0.000210058
ENSRNOG00000015972	Ano5	-1.63695	1.39399	1.24334e-11	2.20949e-09
ENSRNOG00000015999	Cirbp	-0.507512	5.6366	4.33644e-08	5.00015e-06
ENSRNOG00000016174	Slc35b3	-0.554977	2.96559	0.00053813	0.016388
ENSRNOG00000016222	Ppp1r3g	0.74173	1.89485	0.0016632	0.0387482
ENSRNOG00000016265	Acsl5	1.49306	5.68042	0.00153388	0.0366601
ENSRNOG00000016275	Ttr	1.76461	2.22206	4.58103e-05	0.00240266
ENSRNOG00000016336	Rn50_20_0472.1	1.02716	1.39828	1.58952e-12	3.07816e-10
ENSRNOG00000016357	Casc4	-0.317378	7.57429	0.000268447	0.00951854
ENSRNOG00000016361	Plcd4	0.454448	6.4681	0.000261224	0.00930609
ENSRNOG00000016419	Pdlim5	-0.490899	4.53542	2.22558e-05	0.00129797
ENSRNOG00000016451	Cd1d1	-0.626673	1.26969	0.000935082	0.0251643
ENSRNOG00000016475	Nt5c3b	0.392141	5.28996	0.00223562	0.0477639
ENSRNOG00000016479	Plekhg4	-1.84397	0.698779	9.63142e-06	0.000621721
ENSRNOG00000016545	Ift140	0.582167	6.17166	0.000260404	0.00929882
ENSRNOG00000016628	Scgn	1.1575	2.07731	0.000212125	0.00811178
ENSRNOG00000016643	Lpcat2	-0.369912	4.2157	0.000223526	0.00835734
ENSRNOG00000016655	Pex6	0.286571	5.6335	0.00063928	0.0186056
ENSRNOG00000016717	Gas2	-0.386359	3.50904	0.000286047	0.00997862
ENSRNOG00000016760	Kctd19	-0.981606	0.773446	0.00145371	0.035246
ENSRNOG00000016794	Phyhd1	-0.590026	5.00784	2.84273e-07	2.78827e-05
ENSRNOG00000016813	Tia1	-0.525208	5.0551	0.000515097	0.0159437
ENSRNOG00000016888	Pask	-0.718026	2.73794	0.000200469	0.0077247
ENSRNOG00000016891	Uimc1	-0.350146	5.34935	5.11379e-05	0.00257479
ENSRNOG00000016960	Polr3e	-0.27658	5.23188	0.00105049	0.0273684
ENSRNOG00000017105	Dpyd	-0.575588	3.62399	8.53972e-05	0.00392075
ENSRNOG00000017117	Ybx2	-1.15831	0.987079	0.00165753	0.0386971
ENSRNOG00000017282	Tesk2	-0.460305	3.6507	0.000777355	0.0218658
ENSRNOG00000017286	Ephx2	-3.61841	4.08193	1.90038e-58	3.18947e-55
ENSRNOG00000017309	Rsrp1	-0.881957	8.56922	1.20912e-09	1.77318e-07
ENSRNOG00000017328	Pter	0.656934	3.50528	5.59275e-05	0.00276073
ENSRNOG00000017412	AABR07001512.1	3.12768	0.820654	1.59527e-31	1.14746e-28
ENSRNOG00000017414	Irf7	0.607667	3.8693	0.000195407	0.00759273
ENSRNOG00000017429	Lat	-1.1612	0.618776	0.000114671	0.00502062
ENSRNOG00000017445	Tubb2b	0.495908	7.8014	0.000500019	0.0156373
ENSRNOG00000017495	Klhdc3	0.23408	7.27304	0.00238458	0.0498879
ENSRNOG00000017545	Mrs2	-0.370821	4.67229	0.000936269	0.0251643
ENSRNOG00000017601	Srd5a1	0.543392	5.09694	4.63954e-05	0.00242492
ENSRNOG00000017689	Itih3	-0.395046	10.3693	0.00025343	0.00912886
ENSRNOG00000017693	Slc2a5	-0.561063	3.69904	0.000278987	0.00975486
ENSRNOG00000017702	Gpld1	-0.568322	6.54718	4.50302e-08	5.15289e-06
ENSRNOG00000017725	Pnlip	1.25727	3.24777	7.76814e-06	0.00052383
ENSRNOG00000017752	Mccc2	0.743591	5.84642	0.000193197	0.0075602
ENSRNOG00000017773	Crispld1	-0.940231	1.94599	1.70375e-06	0.000139973
ENSRNOG00000017803	Apbb1ip	-0.565468	3.48825	7.12353e-05	0.00338368
ENSRNOG00000017810	Uros	1.55255	2.98422	9.20173e-06	0.000601698
ENSRNOG00000017837	Znf48	0.308631	3.94285	0.00239688	0.0499377
ENSRNOG00000017843	Polr3k	0.728509	6.24848	2.74859e-06	0.000217369
ENSRNOG00000017849	Apbb3	-0.441683	5.94227	0.000752235	0.0213199
ENSRNOG00000017869	Irf8	-0.552487	3.58564	4.81208e-05	0.00246395
ENSRNOG00000017872	LOC688778	-0.636754	2.29154	0.0010732	0.027758
ENSRNOG00000017884	AABR07006160.1	1.70828	0.207823	1.87123e-08	2.27943e-06
ENSRNOG00000017897	Adam8	-1.63267	2.59863	0.000168975	0.00680631
ENSRNOG00000017899	Akr7a3	1.88769	3.52965	0.000628833	0.0183963
ENSRNOG00000017969	Olfm3	0.515006	6.35468	0.000929972	0.0251292
ENSRNOG00000017980	Itgal	-0.854653	1.73627	0.00121739	0.0306478
ENSRNOG00000017993	Abcb10	-0.408203	5.18345	1.38367e-05	0.000849608
ENSRNOG00000018029	Doc2g	-1.71704	2.13724	6.5984e-12	1.21547e-09
ENSRNOG00000018076	Fmo5	-1.02081	0.837202	1.26413e-05	0.000785134
ENSRNOG00000018126	Abca1	0.502669	6.12414	0.00175184	0.0400932
ENSRNOG00000018179	Glt8d1	-0.499831	5.42166	7.96696e-06	0.000532482
ENSRNOG00000018217	Syt5	0.361419	7.19268	0.000458811	0.0147141
ENSRNOG00000018228	Cog2	-0.255831	5.17136	0.00217649	0.0466988
ENSRNOG00000018246	Tdp2	-0.305057	4.89039	0.00208004	0.0451423
ENSRNOG00000018254	Sncaip	-0.604577	3.85114	2.03323e-08	2.45695e-06
ENSRNOG00000018262	Ampd3	-0.308112	6.98187	0.000590445	0.0175564
ENSRNOG00000018293	Strip1	-0.256922	6.84433	0.00160444	0.0379313
ENSRNOG00000018310	Eno4	-0.509598	3.01941	0.00175755	0.0401448
ENSRNOG00000018412	Sfi1	-0.445272	5.23086	0.00169964	0.0392496
ENSRNOG00000018414	Csf1r	-0.264482	7.05804	0.00127207	0.031655
ENSRNOG00000018505	Cidea	2.08101	2.42273	0.000146478	0.00611201
ENSRNOG00000018509	Cx3cr1	-0.568866	4.34969	5.25526e-08	5.92394e-06
ENSRNOG00000018577	Neil1	-0.623061	3.47636	1.08277e-08	1.37439e-06
ENSRNOG00000018648	Mppe1	-0.387938	4.1989	0.00027665	0.00971815
ENSRNOG00000018649	Slc35c2	-1.07002	5.81269	1.02084e-20	3.42662e-18
ENSRNOG00000018680	Rpl17	0.908274	7.7993	0.00023524	0.0086455
ENSRNOG00000018700	Mobp	-0.65547	9.22145	2.25124e-05	0.00130075
ENSRNOG00000018761	Eif3c	0.897661	7.73845	4.45967e-18	1.32085e-15
ENSRNOG00000018785	Slc16a13	-0.740966	3.54238	0.000135991	0.00573781
ENSRNOG00000018798	Bcan	-0.321202	8.47085	0.00120159	0.0303512
ENSRNOG00000018906	Ghdc	-1.4571	4.13682	7.44773e-39	5.92094e-36
ENSRNOG00000018944	Pank1	0.671958	4.76978	0.00197825	0.0435988
ENSRNOG00000019050	Ifit1	8.899	2.96477	3.16125e-98	9.55013e-95
ENSRNOG00000019052	Ankzf1	-0.533229	5.62948	0.00096873	0.0256108
ENSRNOG00000019120	Hmgcs2	-0.716546	5.75284	6.86206e-06	0.000476817
ENSRNOG00000019183	Alox15	2.32085	3.20618	1.54654e-07	1.61107e-05
ENSRNOG00000019221	Gstm4	1.50446	5.17	1.46897e-49	1.70683e-46
ENSRNOG00000019243	Glb1l	-0.715456	3.92592	4.78548e-05	0.00245999
ENSRNOG00000019270	P2ry6	-0.806545	2.04879	5.69419e-05	0.00279256
ENSRNOG00000019276	RGD735029	-0.403455	6.07404	7.1597e-07	6.55438e-05
ENSRNOG00000019310	Eid2	0.513557	4.18039	8.79756e-05	0.00401472
ENSRNOG00000019376	Zfp329	0.287906	5.32806	0.000790002	0.0221391
ENSRNOG00000019506	Dnajb2	0.343215	7.49892	1.81195e-06	0.000146057
ENSRNOG00000019525	Hspa9	0.28915	8.24357	0.0021555	0.0464203
ENSRNOG00000019542	MGC108823	-0.790685	2.22987	0.000946096	0.0252934
ENSRNOG00000019582	Mthfd1l	0.408778	4.99016	0.00030048	0.0103389
ENSRNOG00000019614	Ptpn22	-0.827766	1.31624	0.00228709	0.0485886
ENSRNOG00000019629	Lamp1	0.539736	9.16908	2.15405e-07	2.18368e-05
ENSRNOG00000019659	Aspa	-0.575515	5.39489	0.0023289	0.0492689
ENSRNOG00000019698	Ssbp4	-0.332192	6.6576	0.0018774	0.041888
ENSRNOG00000019735	Dph2	0.342338	3.45703	0.00234237	0.0493466
ENSRNOG00000019741	Isyna1	-0.433333	6.4167	7.87646e-05	0.00366074
ENSRNOG00000019752	Slc29a1	-0.433387	4.32181	0.000479208	0.0151208
ENSRNOG00000019772	Dnpep	-0.283146	6.54783	0.000421807	0.0137611
ENSRNOG00000019851	Cox6a2	1.14758	2.62143	0.000821754	0.0226921
ENSRNOG00000019873	Eml3	-0.862514	4.78315	2.12632e-09	3.00169e-07
ENSRNOG00000019937	Kcnk1	0.652518	5.34947	0.00012026	0.00516058
ENSRNOG00000019946	Gmppa	-0.403867	4.22224	0.00210219	0.0455576
ENSRNOG00000019960	Ino80e	0.279555	5.80712	0.000496451	0.0155902
ENSRNOG00000019962	Sars2	-0.362104	3.64555	0.00145712	0.0352722
ENSRNOG00000019978	Parg	0.257566	5.55283	0.00166814	0.0387482
ENSRNOG00000019983	Mlx	0.300313	5.81632	0.00204559	0.0447029
ENSRNOG00000020004	Rbm34	-0.293237	5.31262	0.0017666	0.040248
ENSRNOG00000020039	Slc5a2	-2.0593	0.141407	3.54067e-12	6.68523e-10
ENSRNOG00000020132	Ttll10	-1.50773	1.83262	3.29845e-09	4.57093e-07
ENSRNOG00000020165	Ahsp	2.30452	0.458278	2.46637e-08	2.91051e-06
ENSRNOG00000020212	LOC302999	-1.54171	0.371382	2.32009e-10	3.68894e-08
ENSRNOG00000020232	Rit1	0.290196	4.95008	0.00183116	0.0412831
ENSRNOG00000020295	Plekhn1	-1.21933	3.77027	0.000146084	0.00611201
ENSRNOG00000020315	Taf13	2.16726	6.78992	3.52677e-21	1.29931e-18
ENSRNOG00000020342	Samd11	-0.885403	2.22834	0.00119076	0.030128
ENSRNOG00000020356	Zfp846	-0.276924	4.32794	0.0018443	0.0414555
ENSRNOG00000020389	Capn12	-1.01011	1.64809	0.000234406	0.00863587
ENSRNOG00000020411	Sec23ip	-0.364618	6.44214	0.00022493	0.00838904
ENSRNOG00000020489	Tmem145	-0.622968	6.51261	0.00111041	0.0284767
ENSRNOG00000020533	Htra1	0.499561	6.89638	0.00235232	0.0494183
ENSRNOG00000020541	Nprl3	-0.628118	4.9228	5.33032e-06	0.000383402
ENSRNOG00000020571	Mpg	-0.527926	2.5426	0.000233579	0.00863587
ENSRNOG00000020624	Acadsb	-0.311752	6.08788	0.000939946	0.0251735
ENSRNOG00000020670	Atrip	-0.354681	3.76207	0.00160464	0.0379313
ENSRNOG00000020704	Tkfc	-0.546543	3.08561	8.6725e-05	0.00396964
ENSRNOG00000020833	Cspg5	0.330408	6.58176	0.000753027	0.0213199
ENSRNOG00000020864	Kirrel2	-1.55413	0.741757	0.000158749	0.00653382
ENSRNOG00000020923	Tuft1	1.50032	2.24088	7.07037e-14	1.61815e-11
ENSRNOG00000020948	Pth1r	-0.626783	2.62019	0.00118556	0.0300468
ENSRNOG00000020951	Slc4a1	1.92052	2.22438	2.97639e-05	0.00166512
ENSRNOG00000020989	Tm7sf2	-0.429657	3.47913	0.00039693	0.013034
ENSRNOG00000021000	Naaladl1	0.691747	1.53119	6.04395e-05	0.00293549
ENSRNOG00000021084	AABR07006310.1	-2.21875	4.59703	4.11163e-44	3.6533e-41
ENSRNOG00000021087	Lgi4	-0.345989	7.13665	0.00106136	0.0274988
ENSRNOG00000021139	Esrra	0.455004	4.78741	0.00018544	0.0073135
ENSRNOG00000021147	Bad	3.33144	4.12288	1.05606e-110	3.98796e-107
ENSRNOG00000021156	Vegfb	-1.12773	5.04029	5.05572e-28	2.8284e-25
ENSRNOG00000021161	Fermt3	-0.568721	3.20805	0.000215018	0.00818098
ENSRNOG00000021176	Mtmr11	-0.623126	4.24012	0.000272804	0.00960539
ENSRNOG00000021225	Oxt	1.62053	7.98543	0.000137971	0.00578901
ENSRNOG00000021365	Ybey	0.960748	2.85038	2.81352e-13	6.15917e-11
ENSRNOG00000021392	Noc2l	-0.519305	6.00547	0.00215167	0.0464203
ENSRNOG00000021493	Prdm9	-0.821541	0.710234	0.000386884	0.0127875
ENSRNOG00000021657	Pld6	0.790875	1.89957	6.93153e-06	0.000476817
ENSRNOG00000021795	Fam227a	-0.804121	4.37746	0.00114091	0.0291599
ENSRNOG00000021800	Zfp541	-1.15044	0.36298	0.000151977	0.00628936
ENSRNOG00000021824	Dnajb1	0.708867	6.43046	5.04285e-11	8.46358e-09
ENSRNOG00000022144	LOC100361993	1.78645	3.56663	1.31118e-12	2.60597e-10
ENSRNOG00000022155	RGD1560289	-1.90094	2.46636	1.18266e-06	0.000102667
ENSRNOG00000022162	Pbx3	0.564348	5.4623	0.00114952	0.0292515
ENSRNOG00000022268	Pnpla3	2.75091	4.34106	7.23177e-05	0.00341362
ENSRNOG00000022312	Lrsam1	-0.311793	5.1284	0.000310008	0.0105943
ENSRNOG00000022429	RGD1312005	0.317495	7.99542	0.00150873	0.0361736
ENSRNOG00000022533	Micall2	-0.49261	3.51028	0.000654131	0.0190013
ENSRNOG00000022586	Cdk9	0.374856	5.92619	9.45275e-06	0.000612806
ENSRNOG00000022609	Mrps10	0.696079	3.94547	1.28769e-05	0.000793897
ENSRNOG00000022619	Fth1	0.352233	10.5886	0.00108561	0.028031
ENSRNOG00000022721	Clec18a	1.58526	0.817325	1.27056e-06	0.000108428
ENSRNOG00000023109	Icoslg	-0.819116	3.84771	8.77434e-07	7.93631e-05
ENSRNOG00000023116	Agmo	0.744211	3.59041	0.000135314	0.00572527
ENSRNOG00000023148	Col11a1	-1.22526	6.1365	0.000219677	0.00831635
ENSRNOG00000023187	RGD1565685	0.426217	4.73206	0.000247143	0.00897377
ENSRNOG00000023546	Hspb1	1.51758	4.6578	5.99281e-05	0.00292004
ENSRNOG00000023627	Cfap74	-1.00142	2.3046	0.000709933	0.0203363
ENSRNOG00000023639	Rpusd1	0.462544	5.06548	1.81786e-06	0.000146057
ENSRNOG00000023828	LOC680875	-0.947852	3.4218	1.43009e-06	0.000119852
ENSRNOG00000024066	Fundc2	0.492925	4.58528	1.22746e-05	0.000769327
ENSRNOG00000024077	Fbxo5	-0.627684	1.59075	0.00128139	0.0317822
ENSRNOG00000024237	Scel	1.73515	0.771572	1.66024e-13	3.74298e-11
ENSRNOG00000024245	Zkscan2	-0.503823	4.22967	0.000459902	0.0147178
ENSRNOG00000024280	Ccdc170	-0.592237	2.92252	0.000430255	0.0139764
ENSRNOG00000024506	LOC500475	-1.08409	2.32484	1.17214e-09	1.7358e-07
ENSRNOG00000024530	Lyrm1	0.683723	4.05656	4.78807e-05	0.00245999
ENSRNOG00000024549	Mum1	-0.28886	5.3038	0.00227515	0.0484029
ENSRNOG00000024580	Mamstr	-0.567305	0.64103	0.00203665	0.0445849
ENSRNOG00000024754	AABR07043169.1	-0.724107	0.713061	0.00110549	0.0284471
ENSRNOG00000024795	Zfp862	-0.869129	1.72902	0.00105857	0.0274738
ENSRNOG00000024825	Fam163a	0.931842	2.58652	0.00136825	0.0335509
ENSRNOG00000024867	Eme2	-0.49259	4.45032	4.54288e-05	0.00239095
ENSRNOG00000024905	Drc1	-0.775039	5.31434	8.69504e-06	0.000576046
ENSRNOG00000025059	Nxph4	-0.564255	4.27678	0.000406956	0.0133054
ENSRNOG00000025094	Gpr183	-1.46532	1.35113	1.08041e-05	0.00068859
ENSRNOG00000025121	Pla2g3	0.86805	2.80263	2.04173e-05	0.00120942
ENSRNOG00000025189	Mettl18	0.596419	2.6534	0.000964891	0.0256108
ENSRNOG00000025512	Mettl17	-0.406412	3.71883	0.000244692	0.00893362
ENSRNOG00000025551	Rgs22	-0.908917	5.41536	3.37261e-09	4.63121e-07
ENSRNOG00000025676	Fam198a	0.858889	2.51151	1.19553e-06	0.000102684
ENSRNOG00000025764	AC128848.1	-0.818128	1.93522	0.00215737	0.0464203
ENSRNOG00000026040	Prss53	-1.05196	2.67323	0.00172903	0.0396917
ENSRNOG00000026128	Cpne8	-0.40085	4.15159	0.000233907	0.00863587
ENSRNOG00000026178	Adpgk	0.491517	6.14255	5.66653e-05	0.00278804
ENSRNOG00000026323	Eqtn	-2.53913	0.66297	1.34131e-07	1.41682e-05
ENSRNOG00000026336	Tmem255b	-0.789703	2.29075	0.0001525	0.00629375
ENSRNOG00000026488	Gltpd2	-0.847178	1.93653	6.60837e-08	7.28609e-06
ENSRNOG00000026514	Wdr93	-0.694949	1.01689	0.00164379	0.0385551
ENSRNOG00000026643	Chordc1	0.658926	6.9744	0.000569023	0.0171217
ENSRNOG00000026807	LOC362863	-0.465538	2.44145	0.000502614	0.0156859
ENSRNOG00000026866	Syn3	-0.607092	3.64621	9.00029e-05	0.00409486
ENSRNOG00000026870	Clic6	0.736109	2.71433	0.0011548	0.0293164
ENSRNOG00000026907	Zbtb37	-1.22267	0.820638	0.000249429	0.00901344
ENSRNOG00000026914	Dnah1	-0.585585	4.66665	0.00239406	0.0499377
ENSRNOG00000026958	LOC500077	0.678281	3.07319	1.21901e-08	1.53442e-06
ENSRNOG00000026982	LOC691921	1.18292	1.97405	2.26132e-05	0.00130075
ENSRNOG00000027016	Cobll1	-0.737213	4.54026	0.000159992	0.00656705
ENSRNOG00000027091	Kctd18	0.312898	4.54492	0.00131364	0.0324756
ENSRNOG00000027220	Pcdhgb8	-0.616757	3.2249	0.000198603	0.00769206
ENSRNOG00000027228	Mogat2	1.04566	1.2154	4.02389e-06	0.000300895
ENSRNOG00000027233	Trpc5	-0.910789	3.91954	0.000222782	0.00835018
ENSRNOG00000027253	Pcdhga10	-0.724476	3.31625	2.21093e-07	2.21166e-05
ENSRNOG00000027286	Lrrc75a	0.456116	2.43749	0.000341043	0.0115142
ENSRNOG00000027296	Pcdhga6	-0.851044	3.3884	4.88527e-07	4.67038e-05
ENSRNOG00000027355	Wdr36	0.324585	5.14822	0.00216258	0.0464662
ENSRNOG00000027433	LOC100910708	1.68408	2.79032	2.45128e-41	2.05703e-38
ENSRNOG00000027498	Engase	-0.391606	4.9749	5.29325e-05	0.00264197
ENSRNOG00000027513	Rtel1	-0.629664	5.96393	0.000431527	0.0139876
ENSRNOG00000027550	Mzf1	-0.62315	4.93442	0.000341501	0.0115142
ENSRNOG00000027730	Nxpe1	-0.681831	1.97439	8.49348e-05	0.0039114
ENSRNOG00000027797	Nit2	-0.632602	5.05744	0.00125103	0.0312919
ENSRNOG00000027971	Lrrc31	2.37878	0.449006	2.99653e-14	7.18454e-12
ENSRNOG00000028041	Tnnt1	2.89112	2.59905	4.31523e-17	1.18512e-14
ENSRNOG00000028047	Mecr	0.6619	3.65946	0.000174321	0.00696593
ENSRNOG00000028448	Elovl1	1.51126	6.1865	0.00103292	0.0270404
ENSRNOG00000028504	Socs5	0.225811	6.71278	0.00166658	0.0387482
ENSRNOG00000028622	Pnpla1	2.29268	2.87732	2.67361e-59	5.0481e-56
ENSRNOG00000028668	LOC691960	-1.17604	4.05442	9.21577e-05	0.00418031
ENSRNOG00000028993	LOC102555453	1.47843	4.54084	3.75028e-22	1.49074e-19
ENSRNOG00000029042	Mt-nd6	-0.568202	6.59833	0.000288662	0.0100466
ENSRNOG00000029047	Cubn	-1.79929	2.55821	1.31793e-07	1.41187e-05
ENSRNOG00000029115	RGD1564883	2.80317	1.46249	8.42355e-28	4.54421e-25
ENSRNOG00000029148	Pdgfd	0.539081	4.30745	0.000130478	0.00556743
ENSRNOG00000029191	LOC685067	-0.918216	1.33467	1.87466e-05	0.00111924
ENSRNOG00000029386	RT1-N2	-2.17231	3.23939	1.13686e-36	8.58611e-34
ENSRNOG00000029427	Grhl3	-3.55984	1.93374	4.68104e-31	3.21396e-28
ENSRNOG00000029500	Tapbp	0.963004	4.87506	4.90091e-13	1.04265e-10
ENSRNOG00000029886	Hba-a1	1.4182	10.8652	0.000194254	0.00758191
ENSRNOG00000029911	Cilp	-1.60788	3.22132	4.91977e-05	0.00250168
ENSRNOG00000030170	Krt10	0.543188	2.31659	0.00125886	0.0313781
ENSRNOG00000030183	Plod2	-0.46707	4.16545	0.00194322	0.0431651
ENSRNOG00000030318	Gpr83	0.414834	4.65933	0.00164317	0.0385551
ENSRNOG00000030483	Rabggta	-0.349476	5.52105	0.00103859	0.0271418
ENSRNOG00000031090	RT1-CE7	1.88011	3.76371	3.15263e-13	6.80292e-11
ENSRNOG00000031167	Srxn1	0.616166	2.09971	0.00086199	0.0236734
ENSRNOG00000031211	Acsm5	-1.13355	2.05811	0.000531374	0.0163138
ENSRNOG00000031213	Slc39a11	0.508096	3.83082	0.00170645	0.0392926
ENSRNOG00000031233	Mapk12	-0.485787	4.10291	2.77924e-06	0.000218648
ENSRNOG00000031448	Stpg1	-0.83406	3.32775	7.8518e-09	1.02243e-06
ENSRNOG00000031478	Zfp663	-1.00388	1.18031	9.87858e-06	0.000632271
ENSRNOG00000031681	AABR07026539.1	-1.32861	0.598325	1.19883e-07	1.29345e-05
ENSRNOG00000031915	Hdac10	-0.80204	4.02352	5.29968e-05	0.00264197
ENSRNOG00000031950	Izumo4	-0.746485	1.40729	1.64753e-05	0.000999438
ENSRNOG00000031993	Prim1	-1.04123	4.5673	1.61583e-15	4.20811e-13
ENSRNOG00000032238	Plcd1	-0.420853	4.58889	0.000455228	0.0146303
ENSRNOG00000032429	Tmprss9	-0.887849	1.72042	9.7284e-06	0.000625308
ENSRNOG00000032539	Spag8	-0.495193	3.82127	0.000297484	0.0102591
ENSRNOG00000032579	Zswim2	-0.620863	1.30197	0.00047503	0.0150426
ENSRNOG00000032605	Rpl32	-2.74428	3.01811	4.59092e-07	4.41693e-05
ENSRNOG00000032699	Ttyh1	-0.326087	9.87193	0.000713141	0.0203629
ENSRNOG00000032813	Mdc1	-0.839957	3.05229	0.000575616	0.0172172
ENSRNOG00000033261	Fam107a	-0.743523	6.99349	2.23779e-05	0.00130007
ENSRNOG00000033517	LOC100360791	1.70597	3.13151	5.97723e-13	1.22008e-10
ENSRNOG00000033545	AY172581.21	1.19763	2.08767	7.55523e-05	0.00354415
ENSRNOG00000033560	Polr3c	-0.351306	4.65087	0.000302877	0.0103976
ENSRNOG00000033583	LOC100910577	0.55773	2.72045	0.000878908	0.0240071
ENSRNOG00000033608	Cd276	-0.458943	4.44695	0.000558963	0.0168863
ENSRNOG00000033700	Wbscr22	-0.323891	4.01659	0.000986567	0.0259167
ENSRNOG00000033748	AABR07060610.1	3.09343	2.62951	7.53826e-52	9.48879e-49
ENSRNOG00000033809	Mlh1	-0.541899	3.37848	2.42393e-05	0.00138164
ENSRNOG00000034078	Mxi1	0.333742	6.4639	0.00165274	0.0386786
ENSRNOG00000034126	Pcdhga2	-0.787403	3.42888	1.65121e-07	1.69671e-05
ENSRNOG00000036674	Cd7	4.47086	0.604357	3.89959e-27	1.96344e-24
ENSRNOG00000036960	Abcc9	-0.895758	3.72562	0.000535834	0.0163825
ENSRNOG00000036980	Zgrf1	-1.16048	2.20215	5.67606e-07	5.32528e-05
ENSRNOG00000037060	Odf3b	-0.745031	2.7121	1.87257e-05	0.00111924
ENSRNOG00000037148	Adap2	-1.19093	1.744	0.000345759	0.0116255
ENSRNOG00000037175	Prss50	-0.809869	0.608527	6.14136e-06	0.000433482
ENSRNOG00000037190	Cd101	-0.699104	1.5947	0.000392386	0.012941
ENSRNOG00000037206	Ccdc77	2.29483	3.95934	3.26753e-81	8.22602e-78
ENSRNOG00000037406	RGD1564171	0.967472	2.4417	1.33909e-07	1.41682e-05
ENSRNOG00000037655	Gatb	-0.507094	4.84895	9.27174e-07	8.33628e-05
ENSRNOG00000037835	Catip	-0.554926	3.9165	7.20032e-05	0.00340943
ENSRNOG00000037850	Marc2	0.991598	5.60137	4.19402e-12	7.82107e-10
ENSRNOG00000038319	Akr1c19	0.935531	2.29966	0.000137296	0.00577677
ENSRNOG00000038375	AABR07026311.1	-2.50118	1.3688	6.0896e-21	2.13915e-18
ENSRNOG00000038597	Dlg1	0.30575	6.98028	0.000213758	0.00815357
ENSRNOG00000038616	Cox6b2	-0.722384	0.83727	0.00123135	0.0308962
ENSRNOG00000038761	Hacd2	1.39	4.62206	0.00154824	0.0368868
ENSRNOG00000038891	Grxcr1	1.73728	0.538353	6.54057e-05	0.00313636
ENSRNOG00000038948	Stab2	-1.93105	0.802994	7.93434e-10	1.18765e-07
ENSRNOG00000038955	MGC105567	-1.03739	1.28232	0.000117816	0.00512741
ENSRNOG00000038960	RGD1309362	0.537933	3.98434	0.000698003	0.0201593
ENSRNOG00000038999	RT1-A1	3.95322	5.85713	2.63215e-116	1.98793e-112
ENSRNOG00000039017	Naa50	0.488473	5.01081	0.000821088	0.0226921
ENSRNOG00000039315	Cfap157	-0.652584	2.12958	0.00231722	0.0490906
ENSRNOG00000039463	Pcdhga1	1.31	1.40569	0.00133078	0.0327384
ENSRNOG00000039469	Pcdhb19	0.462233	2.86183	3.85077e-05	0.0020848
ENSRNOG00000039640	Defb17	9.40416	0.60848	1.4939e-48	1.61181e-45
ENSRNOG00000039744	RT1-CE4	0.587133	4.19579	0.000237522	0.00870818
ENSRNOG00000039890	Abcg3l3	0.838342	2.60334	0.000817127	0.0226472
ENSRNOG00000040040	Ndufaf6	0.616111	3.26526	0.000938726	0.0251735
ENSRNOG00000040266	Cdkl4	-1.01515	2.71191	1.21158e-05	0.000763854
ENSRNOG00000042160	Tmem167b	0.483497	4.83642	8.13012e-06	0.000540993
ENSRNOG00000042340	LOC679894	-0.682204	4.08636	6.41773e-05	0.00309712
ENSRNOG00000042353	Mlkl	-1.24718	0.834924	0.000112971	0.00496413
ENSRNOG00000042404	Ccdc122	1.23473	1.60897	1.04992e-06	9.27431e-05
ENSRNOG00000042726	RGD1560775	0.995861	0.886209	0.000514709	0.0159437
ENSRNOG00000042915	Mxra7	0.606074	2.98044	2.06378e-05	0.00121771
ENSRNOG00000042971	LOC363337	1.74645	1.75677	1.32266e-20	4.34321e-18
ENSRNOG00000043107	Abhd10	0.717625	3.41608	0.000631682	0.01842
ENSRNOG00000043171	Hdhd2	0.675106	5.65149	5.41479e-05	0.00269047
ENSRNOG00000043204	Harbi1	0.39578	3.54759	0.00078437	0.0220221
ENSRNOG00000043233	Cyp4f6	-0.372505	4.37987	0.00131747	0.032517
ENSRNOG00000043288	Smim13	0.950113	1.96805	8.19691e-11	1.34581e-08
ENSRNOG00000043295	RGD1565033	0.602633	3.87407	1.80923e-06	0.000146057
ENSRNOG00000043388	Irf3	-0.647733	5.33318	0.000967003	0.0256108
ENSRNOG00000045654	Hspa1a	1.38743	4.31999	0.000168402	0.00680137
ENSRNOG00000045926	Lrrc45	-0.388395	5.78075	0.000534321	0.016371
ENSRNOG00000045933	Nat8f4	-0.998161	2.10763	2.28736e-07	2.27306e-05
ENSRNOG00000045967	AABR07064061.1	-1.80407	3.88728	4.42112e-27	2.15423e-24
ENSRNOG00000045989	Hba-a3	9.10648	4.6403	9.8845e-21	3.3933e-18
ENSRNOG00000046000	Clasrp	-0.786948	6.04466	0.00115031	0.0292515
ENSRNOG00000046112	Dedd2	0.412831	4.32636	8.83226e-06	0.00058252
ENSRNOG00000046132	AABR07024439.1	1.52135	1.48293	1.23993e-23	5.35117e-21
ENSRNOG00000046195	Slc22a4	-0.574083	2.35874	0.000254847	0.00914362
ENSRNOG00000046202	Metrnl	0.520975	2.65877	0.00155684	0.0370333
ENSRNOG00000046338	LOC100909824	0.414258	2.86417	0.000873066	0.0238907
ENSRNOG00000046443	Mthfsd	-0.538225	2.31938	0.000134695	0.00571508
ENSRNOG00000046452	Fcgr2b	0.655405	3.06704	0.000253831	0.00912886
ENSRNOG00000046493	Pnpo	0.445206	6.57178	3.83185e-05	0.00208202
ENSRNOG00000046533	AABR07043421.1	0.560186	5.58723	1.28484e-06	0.000109031
ENSRNOG00000046536	LOC690700	0.635654	3.69692	8.86988e-06	0.00058252
ENSRNOG00000046663	Fcgr2a	-0.603212	3.8944	0.000221506	0.00833163
ENSRNOG00000046667	Fosb	-2.50713	4.90129	0.000272359	0.00960539
ENSRNOG00000046700	Wbscr27	1.35968	1.81259	7.08234e-15	1.8132e-12
ENSRNOG00000046744	Ankrd29	0.405144	5.08337	0.000934961	0.0251643
ENSRNOG00000046864	Acot4	-0.837863	1.53128	0.000181254	0.00716713
ENSRNOG00000046871	LOC681367	-0.807322	1.29955	0.000729846	0.0207614
ENSRNOG00000047003	LOC100912852	0.735648	3.68264	6.57207e-06	0.000459588
ENSRNOG00000047158	Selenbp1	0.845381	3.68343	2.79801e-06	0.000218984
ENSRNOG00000047287	Nucks1	0.404445	5.89847	4.71678e-05	0.00244647
ENSRNOG00000047321	Hba-a2	1.70141	9.91973	1.47999e-05	0.000905073
ENSRNOG00000047657	C4a	-0.956096	4.77413	0.000972867	0.0256108
ENSRNOG00000047706	RT1-CE16	7.03013	4.11428	9.41366e-292	1.42193e-287
ENSRNOG00000047854	RT1-DMa	-1.09756	3.30181	5.37829e-14	1.26936e-11
ENSRNOG00000047864	RT1-DMa	-1.09079	3.30586	6.41394e-14	1.4905e-11
ENSRNOG00000047917	Plscr5	1.01066	0.559885	1.71433e-06	0.000139973
ENSRNOG00000048025	Cstf2	-0.439579	7.50042	0.000161088	0.00659413
ENSRNOG00000048036	Ncan	-0.498525	6.29591	0.00204796	0.0447029
ENSRNOG00000048043	F2r	-0.396395	5.67849	4.52737e-05	0.00239095
ENSRNOG00000048230	LOC300308	-4.34885	3.26184	1.30794e-24	5.98681e-22
ENSRNOG00000048231	Tmem235	1.00009	0.204645	0.000604186	0.0178946
ENSRNOG00000048273	Apod	0.648267	8.43926	0.00168257	0.0389548
ENSRNOG00000048288	Taf12	0.440598	4.26351	0.000505482	0.0157429
ENSRNOG00000048302	LOC100910979	-0.978856	1.48048	0.000181108	0.00716713
ENSRNOG00000048356	RGD1308750	2.53547	0.572751	5.54424e-29	3.48941e-26
ENSRNOG00000048394	Zfp560	0.815726	4.58226	1.50734e-08	1.86626e-06
ENSRNOG00000048411	Uhrf1	-0.975134	2.09269	1.43616e-06	0.000119852
ENSRNOG00000048553	Iqcc	-0.970972	1.66868	4.69316e-05	0.00244449
ENSRNOG00000048676	Pip5kl1	-1.53094	4.0778	7.94123e-10	1.18765e-07
ENSRNOG00000048686	LOC100360856	1.26937	4.9033	2.83272e-16	7.50672e-14
ENSRNOG00000048712	Ccdc137	0.324067	4.47448	0.000618651	0.0181614
ENSRNOG00000048843	Tsfm	0.380002	4.20619	0.00132415	0.0326285
ENSRNOG00000048881	RGD1563400	-0.594944	1.95706	0.00125572	0.0313514
ENSRNOG00000048951	LOC100364500	-0.650721	0.671689	0.00127514	0.0316794
ENSRNOG00000049034	Ptrh1	-0.914266	2.16372	3.03469e-05	0.00169148
ENSRNOG00000049054	Ntsr2	-0.5395	7.17274	1.47287e-07	1.54498e-05
ENSRNOG00000049334	Atp2c2	1.08556	0.346629	1.2012e-05	0.000762355
ENSRNOG00000049430	Mpv17	-0.574214	2.84375	0.000150837	0.00625932
ENSRNOG00000049446	LOC100366030	0.813104	0.414001	0.00184966	0.0414557
ENSRNOG00000049452	Nebl	-0.369912	5.50336	0.00147196	0.0354367
ENSRNOG00000049491	RT1-DMb	-0.557972	3.34726	0.00174642	0.0400299
ENSRNOG00000049614	AABR07028488.1	-0.424702	4.75708	0.000929613	0.0251292
ENSRNOG00000049642	Smim5	-1.09632	1.12663	0.000543209	0.0165094
ENSRNOG00000049873	Ap1s3	1.41747	2.72895	1.5979e-14	3.95677e-12
ENSRNOG00000049893	LOC100910934	0.567987	2.69793	0.000596703	0.0177077
ENSRNOG00000050087	Mphosph6	0.771005	5.5084	0.000163004	0.00665451
ENSRNOG00000050210	RT1-CE10	-1.89828	0.793239	1.7092e-07	1.74443e-05
ENSRNOG00000050233	Cchcr1	0.533684	3.97841	0.00206147	0.0449329
ENSRNOG00000050298	Rfng	0.253959	5.34461	0.00236954	0.0497109
ENSRNOG00000050381	Dus3l	-0.656907	4.62663	1.52121e-08	1.86812e-06
ENSRNOG00000050404	Pmepa1	0.45259	5.0959	5.85389e-06	0.00041709
ENSRNOG00000050419	Avil	-1.72916	2.23072	4.88403e-10	7.60549e-08
ENSRNOG00000050624	Lysmd4	-0.436271	3.72045	7.97659e-05	0.0036959
ENSRNOG00000050647	Hspa1b	1.4561	4.49463	6.86175e-05	0.00327996
ENSRNOG00000050650	Ttc16	-0.586408	2.84211	0.00109645	0.0282626
ENSRNOG00000050655	P4ha1	0.361601	6.17348	0.000702905	0.020252
ENSRNOG00000051073	Rn50_X_1141.3	-0.887652	0.637019	0.000806654	0.0224392
ENSRNOG00000051605	AABR07053734.2	-0.983798	0.30899	9.62395e-05	0.0043394
ENSRNOG00000051952	Tes	0.59236	3.77497	9.94005e-05	0.00444214
ENSRNOG00000052054	AABR07070161.1	-1.48645	0.241189	0.000327807	0.011127
ENSRNOG00000052116	Atp11b	-0.392617	5.43076	0.000171406	0.00686761
ENSRNOG00000052237	AABR07071904.1	-2.10955	2.41247	5.03016e-29	3.30351e-26
ENSRNOG00000052365	3082ex4-5	-0.970841	0.0768536	0.000186869	0.00735067
ENSRNOG00000052745	Met	-1.08135	2.32268	1.63859e-07	1.69527e-05
ENSRNOG00000053079	AC117889.1	-0.683069	3.29982	7.55246e-09	9.91999e-07
ENSRNOG00000053260	Lilrb3l	1.88115	1.75869	3.29227e-21	1.24324e-18
ENSRNOG00000053270	AABR07053741.1	0.521723	3.35778	0.000277934	0.00974059
ENSRNOG00000053272	Chi3l1	-1.97974	5.51608	8.50155e-111	3.98796e-107
ENSRNOG00000053387	AABR07013288.4	-0.917183	0.433855	0.00194983	0.0432484
ENSRNOG00000053735	Hebp2	0.710906	3.36026	0.0012221	0.0307152
ENSRNOG00000053812	Selenbp1	0.842334	3.68547	2.92969e-06	0.000224634
ENSRNOG00000054126	AC135645.1	-0.930419	0.332474	0.000549325	0.0166593
ENSRNOG00000054334	Abhd10	0.713619	3.48458	0.000463555	0.0148034
ENSRNOG00000054385	Rhebl1	-0.749708	1.43877	0.000113053	0.00496413
ENSRNOG00000054698	AABR07066792.1	-0.502799	3.19006	0.00168404	0.0389548
ENSRNOG00000055078	Cyp4b1	0.816435	1.65058	0.000766017	0.0216269
ENSRNOG00000055093	Fgfr1op	0.637981	5.11633	4.86237e-06	0.000353106
ENSRNOG00000055142	Ect2l	-0.832193	1.27175	0.00145998	0.0352847
ENSRNOG00000055204	AABR07034833.1	0.596214	1.992	0.00157194	0.0373336
ENSRNOG00000055317	AABR07028908.2	-1.7524	2.52731	2.16108e-11	3.75982e-09
ENSRNOG00000055562	Dkc1	-0.331305	5.80055	0.000371392	0.0123294
ENSRNOG00000055766	AABR07044415.1	-0.829638	0.886445	0.00237975	0.0498559
ENSRNOG00000055892	AABR07043395.1	2.98662	0.399043	5.50769e-13	1.13964e-10
ENSRNOG00000056128	Nemf	-0.469798	5.04763	4.95587e-07	4.70808e-05
ENSRNOG00000056446	Endou	-0.52235	2.9462	0.000195536	0.00759273
ENSRNOG00000056571	AABR07005779.5	-1.85485	0.137331	8.84301e-12	1.60932e-09
ENSRNOG00000056819	Susd1	0.811894	1.44875	0.000306591	0.0105013
ENSRNOG00000056996	Cfap65	-0.796694	4.51451	0.00198039	0.0435988
ENSRNOG00000057086	LOC102556148	-0.905684	2.13451	5.54274e-06	0.000396792
ENSRNOG00000057089	LOC103691744	0.6898	1.69207	0.000231239	0.00860311
ENSRNOG00000057092	Slfn4	-1.18879	3.5527	0.000550347	0.0166593
ENSRNOG00000057851	LOC680254	-0.74379	2.58357	2.67371e-05	0.00151829
ENSRNOG00000058105	Hbb	2.33523	9.85745	7.07451e-09	9.37373e-07
ENSRNOG00000058180	LOC102554748	0.892461	0.607929	1.26827e-05	0.000785134
ENSRNOG00000058193	Slc27a6	0.901169	1.58483	0.000108712	0.00482968
ENSRNOG00000058275	Spef2	-0.70655	2.59955	0.000347761	0.0116255
ENSRNOG00000058388	Zfp36	-1.88263	5.14416	0.000565089	0.0170373
ENSRNOG00000058422	Pirb	1.23451	0.699196	4.15972e-06	0.00030952
ENSRNOG00000058568	Dhrs9	-1.26478	1.53004	0.000217811	0.00826642
ENSRNOG00000058645	Tnc	-0.708778	4.26292	0.00138514	0.0338513
ENSRNOG00000058727	AABR07012081.2	-0.302588	5.06449	0.00207157	0.0450722
ENSRNOG00000058821	LOC103690120	-1.32765	0.961992	1.87806e-09	2.67623e-07
ENSRNOG00000059013	AABR07060519.1	-0.743247	2.74539	4.8555e-06	0.000353106
ENSRNOG00000059443	LOC103690028	0.311105	3.71502	0.00166998	0.0387482
ENSRNOG00000059715	Cc2d2a	-0.651005	5.46272	0.00201079	0.0441469
ENSRNOG00000059865	Dnah12	-0.710434	6.35175	3.93449e-05	0.00211496
ENSRNOG00000059883	AABR07052758.1	0.34669	6.17933	0.0018927	0.0421669
ENSRNOG00000059927	AABR07044414.1	0.704367	0.828907	0.00128891	0.0319165
ENSRNOG00000059957	AABR07021734.2	-4.40505	1.98537	2.04716e-55	3.09223e-52
ENSRNOG00000060438	AABR07001634.1	-1.8073	1.51694	4.58843e-11	7.78745e-09
ENSRNOG00000060635	AABR07052897.3	0.552411	2.2425	0.000587647	0.0175077
ENSRNOG00000060675	AABR07055801.1	0.689352	0.612345	0.000169868	0.00682409
ENSRNOG00000060831	Clca1	-2.65682	1.92118	2.52191e-12	4.82195e-10
ENSRNOG00000060858	AABR07043711.1	1.10215	1.55502	1.00273e-07	1.08966e-05
ENSRNOG00000060949	Anxa8	1.89975	2.6488	0.00212916	0.0460099
ENSRNOG00000060979	Hspa13	0.310496	6.2722	0.00143962	0.0349606
ENSRNOG00000061005	AABR07016572.1	0.625578	1.34098	0.00233896	0.0493466
ENSRNOG00000061085	Fancd2	-0.672232	2.00458	7.69955e-05	0.00358956
ENSRNOG00000061118	AABR07012047.1	0.463423	5.13361	8.55144e-09	1.10401e-06
ENSRNOG00000061533	AABR07001926.3	0.490111	3.53292	0.000516772	0.0159629
ENSRNOG00000061579	Rpl12-ps1	5.02793	1.77904	1.52949e-77	3.30042e-74
ENSRNOG00000061883	Aqp9	0.928157	3.27188	2.68728e-07	2.65303e-05
ENSRNOG00000061943	Rn60_7_1214.2	-6.12816	0.362152	2.32428e-46	2.34055e-43
ENSRNOG00000062164	Rn60_1_2216.1	-6.06788	0.313965	1.83456e-54	2.51918e-51

## Sheet: EGK vs. GK DEGs
Genes differentially expressed in hypothalamus of exercised GK and GK rats
Ensembl ID	Gene	logFC	logCPM	PValue	FDR
ENSRNOG00000000221	Abhd5	-0.555956	5.3025	0.000610763	0.0473106
ENSRNOG00000000321	Cd24	-0.723196	6.14834	4.27827e-06	0.000552336
ENSRNOG00000000521	Cdkn1a	1.08792	3.637	9.95224e-08	1.72792e-05
ENSRNOG00000000658	Acacb	-0.749498	4.4504	3.70478e-05	0.00391334
ENSRNOG00000000967	Aacs	-0.761537	5.84459	1.42873e-06	0.000205533
ENSRNOG00000001128	Tesc	1.05905	2.44737	1.07489e-05	0.00126846
ENSRNOG00000001302	Adora2a	1.20781	2.62891	2.97258e-07	4.77668e-05
ENSRNOG00000001823	St6gal1	-1.25918	5.25739	2.23029e-14	7.87562e-12
ENSRNOG00000001851	Far2	-1.81717	5.35426	7.21811e-28	4.95589e-25
ENSRNOG00000002256	Art3	0.913002	2.58618	0.000112125	0.0105853
ENSRNOG00000002342	Aldh3a2	-0.687025	6.76034	1.04184e-05	0.00123913
ENSRNOG00000002408	Rbm47	-1.15394	0.704921	0.000122796	0.0115207
ENSRNOG00000002434	Tmem100	0.615909	5.82821	9.2769e-05	0.00886883
ENSRNOG00000002525	Ptgs2	0.872389	3.2189	5.66346e-05	0.00566533
ENSRNOG00000002781	Kdsr	-1.49772	4.96769	2.79812e-18	1.50949e-15
ENSRNOG00000002907	Plekha6	-0.558485	6.85638	0.000328607	0.0269761
ENSRNOG00000002911	Alb	1.21356	0.780493	3.03083e-05	0.00327004
ENSRNOG00000003209	Pcp4l1	0.694448	5.58406	1.21526e-05	0.00140125
ENSRNOG00000003546	Tnfrsf12a	0.757324	3.39182	0.000317307	0.0263348
ENSRNOG00000003891	Dio2	0.880934	2.74604	0.000128222	0.0119555
ENSRNOG00000004049	Baiap2	0.885883	5.50459	3.31428e-08	6.18052e-06
ENSRNOG00000004078	Eno3	1.68156	3.22791	2.24198e-14	7.87562e-12
ENSRNOG00000004117	Kcnv1	1.47054	2.90938	1.0923e-10	2.74987e-08
ENSRNOG00000004292	Sptssa	-0.761427	6.25363	1.24778e-06	0.000181228
ENSRNOG00000004443	Sptlc3	-6.38539	6.01402	2.93644e-220	2.21774e-216
ENSRNOG00000004730	Meis2	1.1986	4.01158	6.3658e-10	1.52628e-07
ENSRNOG00000004731	Ano3	1.26667	4.85323	2.93936e-13	8.7057e-11
ENSRNOG00000004754	Tc2n	-3.46917	3.77728	8.44917e-57	9.81729e-54
ENSRNOG00000004834	Llgl2	-1.1103	1.30394	9.05946e-05	0.00871613
ENSRNOG00000005049	Tbr1	2.39783	0.959171	1.59219e-15	6.5e-13
ENSRNOG00000005108	Wfs1	0.923518	6.00361	5.05001e-09	1.08972e-06
ENSRNOG00000005126	Pqlc3	-0.897786	3.16742	3.73851e-05	0.00392154
ENSRNOG00000005175	Sgpp1	-0.636699	6.31342	4.84595e-05	0.00491262
ENSRNOG00000005269	Srl	1.27688	1.54106	4.63102e-06	0.00059281
ENSRNOG00000005284	Itpka	2.22095	2.25047	6.31547e-18	2.9811e-15
ENSRNOG00000005404	Rasgrp1	0.602819	5.8409	0.000132157	0.0122468
ENSRNOG00000005457	Lamp5	0.989771	4.07011	2.21973e-07	3.64446e-05
ENSRNOG00000005727	Galnt3	-1.35193	0.784358	4.26292e-06	0.000552336
ENSRNOG00000005776	Bcl11b	1.30849	3.79584	6.89624e-11	1.76555e-08
ENSRNOG00000005934	Mlip	1.31286	1.14444	3.49462e-06	0.000459011
ENSRNOG00000006019	G0s2	-1.81888	2.91449	2.27872e-15	8.60501e-13
ENSRNOG00000006204	Slc30a3	1.25901	3.26969	4.6515e-09	1.01827e-06
ENSRNOG00000006331	Elovl5	-0.567386	6.73435	0.000268471	0.0226551
ENSRNOG00000006410	Akap5	0.789714	3.4523	0.000154446	0.0139695
ENSRNOG00000006783	Neb	2.249	2.6509	3.63687e-20	2.1974e-17
ENSRNOG00000006930	Casq1	1.86169	2.15353	4.2536e-13	1.21228e-10
ENSRNOG00000006963	Ctse	-5.56496	5.05623	3.12343e-161	1.57265e-157
ENSRNOG00000007014	Cnksr2	0.786407	4.71762	7.1855e-06	0.000904475
ENSRNOG00000007060	Plin2	-1.38257	5.97942	4.433e-18	2.23202e-15
ENSRNOG00000007189	Ttc22	0.998757	1.26352	0.000377284	0.0304753
ENSRNOG00000007346	Grasp	1.02774	3.06277	3.36799e-06	0.000446258
ENSRNOG00000007461	Klhl41	1.56367	1.35333	2.96218e-08	5.59296e-06
ENSRNOG00000007561	Glb1l2	-1.81426	1.27601	8.97715e-10	2.11875e-07
ENSRNOG00000007743	Mgst1	-0.76865	5.61747	1.23559e-06	0.0001812
ENSRNOG00000008046	Tmem30b	-1.75242	0.80964	6.15328e-09	1.27322e-06
ENSRNOG00000008129	Pla2r1	-1.32681	1.2078	2.6106e-06	0.000358484
ENSRNOG00000008656	Snca	0.586328	6.4494	0.000179474	0.0161366
ENSRNOG00000008671	Dct	-1.81769	4.63981	1.45358e-23	9.14847e-21
ENSRNOG00000008697	Nov	0.669909	4.91073	8.6467e-05	0.00837234
ENSRNOG00000008919	Arpp21	1.17818	6.03921	1.12306e-13	3.57625e-11
ENSRNOG00000009096	Pon3	-3.09924	2.09146	1.41014e-29	1.0143e-26
ENSRNOG00000009204	Il17re	-1.33432	0.597807	1.37115e-05	0.00156903
ENSRNOG00000009269	Cga	-0.898291	5.78924	1.56229e-08	3.06472e-06
ENSRNOG00000009571	Wipf3	0.971075	4.69924	3.55423e-08	6.54715e-06
ENSRNOG00000009779	Krt8	-0.72422	4.10781	0.000144537	0.0132317
ENSRNOG00000009967	Otof	0.709947	4.96933	2.73285e-05	0.00296977
ENSRNOG00000010079	Car3	3.48688	4.10542	1.47871e-62	1.86133e-59
ENSRNOG00000010626	Sphk1	-3.40492	3.51903	3.36018e-51	3.3837e-48
ENSRNOG00000010805	Fabp4	4.86762	3.20499	2.33417e-79	3.91751e-76
ENSRNOG00000010882	Sptlc1	-1.19063	6.3851	5.15378e-14	1.72995e-11
ENSRNOG00000010959	Klhl25	-0.718735	3.71069	0.000347265	0.0283537
ENSRNOG00000011310	Pde10a	1.00546	4.70808	1.19176e-08	2.4002e-06
ENSRNOG00000011648	Aqp1	1.17449	2.98864	1.72157e-07	2.88936e-05
ENSRNOG00000011826	Lzts1	0.645058	5.54019	5.14707e-05	0.0051831
ENSRNOG00000011912	Tmem38a	0.553745	6.03963	0.000423607	0.033855
ENSRNOG00000011951	Plk2	0.593023	5.57944	0.000186723	0.0165909
ENSRNOG00000011994	Perp	-0.761328	3.53582	0.000255568	0.0216981
ENSRNOG00000012110	Col17a1	-1.18669	0.634079	0.000319699	0.0263883
ENSRNOG00000012181	Lpl	1.02465	4.71257	5.47942e-09	1.16573e-06
ENSRNOG00000012303	Apobec2	1.41752	1.35739	4.47155e-07	7.0357e-05
ENSRNOG00000012404	Thrsp	-3.45573	6.16687	1.77974e-89	3.84043e-86
ENSRNOG00000012436	Adh6	-3.35865	3.90468	5.94139e-56	6.41034e-53
ENSRNOG00000012660	Postn	1.82885	2.44795	3.02149e-13	8.77685e-11
ENSRNOG00000013279	LOC681458	-7.07965	7.10144	2.17791e-263	3.28974e-259
ENSRNOG00000013532	Pgam2	0.933357	2.10427	0.000236967	0.0205374
ENSRNOG00000013631	Slc31a2	-1.14283	3.11645	1.9643e-07	3.26053e-05
ENSRNOG00000013663	Tmem86a	-2.31386	4.25657	7.33079e-33	5.53658e-30
ENSRNOG00000013869	Kcnj4	1.78655	2.58726	1.13644e-13	3.57625e-11
ENSRNOG00000014314	Slc39a4	-0.930701	2.03242	0.000255694	0.0216981
ENSRNOG00000014320	Inhba	1.12661	1.97372	1.38967e-05	0.00157126
ENSRNOG00000014481	Adtrp	-1.44176	1.91674	3.74164e-08	6.80934e-06
ENSRNOG00000014654	LOC691807	-0.734829	6.88466	2.32536e-06	0.000322244
ENSRNOG00000014692	Mogat1	-5.02957	3.60843	1.17942e-93	2.96919e-90
ENSRNOG00000014900	Crem	0.632592	4.2645	0.000615299	0.0474188
ENSRNOG00000014971	Mas1	1.18794	1.65683	1.19121e-05	0.00138409
ENSRNOG00000015072	Ptgr1	-0.896621	1.93286	0.000578817	0.0450672
ENSRNOG00000015113	Mocos	-1.18637	1.03856	4.43274e-05	0.00455487
ENSRNOG00000015139	F12	1.29051	0.534227	1.92741e-05	0.00212507
ENSRNOG00000015155	Tnnc2	3.62115	2.73492	2.48969e-45	2.35043e-42
ENSRNOG00000015353	Prss12	1.29544	0.625038	2.06556e-05	0.00226089
ENSRNOG00000015616	Rgs14	1.03443	4.04722	7.87776e-08	1.38365e-05
ENSRNOG00000015667	Epcam	-1.67454	3.22627	5.43447e-14	1.78451e-11
ENSRNOG00000015691	Fam212b	0.81302	4.4441	7.41472e-06	0.000925615
ENSRNOG00000015719	Egr4	1.39633	1.8139	1.66365e-07	2.82354e-05
ENSRNOG00000015916	Ttc38	-1.41408	3.36226	3.69716e-11	9.62856e-09
ENSRNOG00000016163	Slc1a3	-0.79497	9.6462	5.16e-07	7.95324e-05
ENSRNOG00000016265	Acsl5	-1.38515	5.68042	5.73157e-18	2.79275e-15
ENSRNOG00000016327	Mcee	-0.680897	4.16791	0.000289206	0.0241351
ENSRNOG00000016351	Frrs1	-1.44364	1.42295	2.47018e-07	4.01206e-05
ENSRNOG00000016385	Gabrd	1.26171	2.16368	5.09757e-07	7.93802e-05
ENSRNOG00000016714	Nrap	1.13325	0.762846	0.000108061	0.0102658
ENSRNOG00000016731	Tpm2	0.762711	5.43919	2.17573e-06	0.0003043
ENSRNOG00000016793	Tshb	-1.20238	3.68881	6.70525e-09	1.36869e-06
ENSRNOG00000016962	Neu2	1.09488	1.01986	0.000139229	0.0128235
ENSRNOG00000017154	Atp11a	-0.560667	6.1695	0.000354804	0.0288135
ENSRNOG00000017645	Mylpf	4.35685	3.06609	5.24933e-65	7.92912e-62
ENSRNOG00000017766	Car12	0.9466	3.78747	2.03223e-06	0.000286886
ENSRNOG00000017786	Acta1	3.21705	4.75001	1.48758e-64	2.04272e-61
ENSRNOG00000017828	Egr3	1.80758	2.1397	4.34525e-12	1.21546e-09
ENSRNOG00000017899	Akr7a3	-1.65603	3.52965	2.89479e-15	1.06648e-12
ENSRNOG00000018366	RGD1310819	1.07578	4.68505	1.19005e-09	2.72358e-07
ENSRNOG00000018385	Chrm1	1.64586	2.41177	2.32173e-11	6.26246e-09
ENSRNOG00000018505	Cidea	-1.43404	2.42273	3.20902e-09	7.12828e-07
ENSRNOG00000018570	C1qtnf3	-1.88251	2.70702	1.89132e-15	7.32523e-13
ENSRNOG00000018662	Amacr	-0.640166	4.87603	0.000182906	0.0163479
ENSRNOG00000018712	Camk2a	0.675058	6.98867	1.3939e-05	0.00157126
ENSRNOG00000018740	Ugt1a2	-1.56031	3.63887	3.8298e-14	1.31475e-11
ENSRNOG00000019199	LOC100911692	-0.93945	1.75574	0.000440216	0.0349971
ENSRNOG00000019321	Cck	0.616734	5.25034	0.000151663	0.0138004
ENSRNOG00000019560	Pde2a	0.546755	7.23239	0.000410355	0.0329703
ENSRNOG00000019627	Mybpc2	2.52416	1.50455	4.34806e-18	2.23202e-15
ENSRNOG00000019745	Actn3	3.73955	2.16732	4.61198e-40	3.87022e-37
ENSRNOG00000019810	Des	0.626269	4.55855	0.000471406	0.0372806
ENSRNOG00000019857	Gng7	1.03595	5.42116	1.58514e-10	3.92518e-08
ENSRNOG00000020133	LOC100911794	1.169	1.97929	9.30036e-06	0.00113192
ENSRNOG00000020151	Cdh1	-0.719697	4.00383	0.000201906	0.0177314
ENSRNOG00000020332	Tnnt3	5.57086	3.38604	2.63177e-98	7.95058e-95
ENSRNOG00000020650	Slc17a7	4.15159	5.11828	3.95145e-107	1.49217e-103
ENSRNOG00000020694	Icam5	0.673464	5.29874	3.41211e-05	0.00365531
ENSRNOG00000020719	Hrc	1.38746	1.06786	1.67117e-06	0.000238142
ENSRNOG00000020865	Ano1	-1.08908	2.76357	3.2021e-06	0.000431855
ENSRNOG00000021011	Fut2	-1.63387	1.0815	1.38221e-08	2.74713e-06
ENSRNOG00000021138	Cers2	-0.729891	6.63803	3.02708e-06	0.000411928
ENSRNOG00000021475	Ldah	-0.587364	5.49105	0.000237938	0.0205374
ENSRNOG00000021745	Bhlhe22	0.852479	3.42872	4.52773e-05	0.00462104
ENSRNOG00000022239	Tusc5	0.962063	1.88811	0.00024489	0.0210174
ENSRNOG00000022268	Pnpla3	-2.67691	4.34106	2.98272e-43	2.65024e-40
ENSRNOG00000023389	Ephx4	1.5295	1.65879	2.25206e-08	4.36121e-06
ENSRNOG00000023688	Drd1	1.17331	3.40958	2.66999e-08	5.10508e-06
ENSRNOG00000023803	Cmya5	2.3063	1.37076	1.82591e-15	7.25801e-13
ENSRNOG00000026055	Neurod6	0.922254	2.20187	0.000196569	0.0173636
ENSRNOG00000026953	Gpr88	1.32205	4.66867	1.20268e-13	3.6333e-11
ENSRNOG00000027271	RGD1359290	-1.60049	4.55636	2.13013e-17	9.75017e-15
ENSRNOG00000027839	Ptk2b	0.704447	6.54888	6.78058e-06	0.000860678
ENSRNOG00000028404	Ppp1r1b	0.621973	6.98439	6.1486e-05	0.00611017
ENSRNOG00000028417	AC142182.1	1.78131	1.07712	9.4823e-10	2.20354e-07
ENSRNOG00000028436	Rprml	1.26021	2.00351	9.96577e-07	0.000148544
ENSRNOG00000028448	Elovl1	-1.33333	6.1865	4.88847e-17	2.17178e-14
ENSRNOG00000029330	Car5b	-0.873601	4.18495	3.30137e-06	0.000441303
ENSRNOG00000030180	Lrrc10b	1.10445	2.12184	1.58753e-05	0.00177627
ENSRNOG00000030729	C4b	1.82975	3.08629	6.30623e-16	2.64599e-13
ENSRNOG00000031766	Mt-cyb	0.63641	12.7339	0.000575682	0.0450554
ENSRNOG00000033134	Mef2c	0.967104	4.57366	6.44138e-08	1.14467e-05
ENSRNOG00000033564	Cfd	2.10372	2.62059	2.63766e-18	1.47563e-15
ENSRNOG00000033609	Irx1	-0.939004	2.59844	6.62567e-05	0.00649875
ENSRNOG00000036866	Acer3	-0.699847	5.76206	9.44205e-06	0.00113192
ENSRNOG00000038761	Hacd2	-1.0733	4.62206	1.63589e-09	3.68808e-07
ENSRNOG00000040108	Cd36	1.5047	2.95147	2.88523e-11	7.64586e-09
ENSRNOG00000042975	Tmem45al	-1.26426	0.763058	1.82004e-05	0.00202145
ENSRNOG00000043098	Mt2A	1.06118	5.02074	3.53588e-10	8.61444e-08
ENSRNOG00000043465	Arc	1.44715	4.04426	1.16109e-13	3.57924e-11
ENSRNOG00000045654	Hspa1a	0.730697	4.31999	6.46949e-05	0.00638703
ENSRNOG00000046667	Fosb	0.772194	4.90129	8.73148e-06	0.00107227
ENSRNOG00000046834	C3	0.922109	3.13095	4.05095e-05	0.00419107
ENSRNOG00000047014	Homer1	0.722804	3.88333	0.000218872	0.0191102
ENSRNOG00000047046	Plin4	0.884328	2.37933	0.00028605	0.0240044
ENSRNOG00000047746	AABR07000398.1	-0.827139	6.21683	1.5007e-07	2.57592e-05
ENSRNOG00000047891	Foxg1	1.84143	3.23128	7.45599e-17	3.21779e-14
ENSRNOG00000049537	Rn50_13_0828.1	-1.47786	0.861269	8.6398e-07	0.000130504
ENSRNOG00000049695	Myh4	4.08626	4.4301	4.29731e-87	8.11387e-84
ENSRNOG00000049918	Lrg1	1.16077	1.90737	9.39317e-06	0.00113192
ENSRNOG00000050223	LOC100911794	1.25708	2.81027	6.25481e-08	1.12475e-05
ENSRNOG00000050647	Hspa1b	0.736242	4.49463	3.9579e-05	0.00412304
ENSRNOG00000051073	Rn50_X_1141.3	1.05461	0.637019	0.000535846	0.042156
ENSRNOG00000051264	Dlx6as	0.947998	2.80946	3.44291e-05	0.00366234
ENSRNOG00000056162	Mrfap1	1.06052	6.50222	1.77743e-11	4.88148e-09
ENSRNOG00000056596	Alas1	-0.823034	5.3689	3.70482e-07	5.89066e-05
ENSRNOG00000057315	Kcnh3	2.51871	2.73077	6.02814e-25	3.95892e-22
ENSRNOG00000058105	Hbb	-0.541699	9.85745	0.000645624	0.0495033
ENSRNOG00000058555	AABR07070810.1	-1.44941	1.0627	5.48483e-07	8.36852e-05
ENSRNOG00000059081	AABR07026032.4	1.33284	0.821322	7.67538e-06	0.000950301
ENSRNOG00000059605	Ddn	2.1545	6.13232	9.13378e-40	7.26136e-37
ENSRNOG00000059947	Sdc1	-1.28711	1.89514	1.00308e-06	0.000148544
ENSRNOG00000060289	AABR07037548.1	-1.76068	0.736614	5.81758e-09	1.22048e-06
ENSRNOG00000060775	Lmo7	0.787726	4.53357	1.14315e-05	0.00133855
ENSRNOG00000060949	Anxa8	-2.18149	2.6488	1.99952e-19	1.16164e-16
ENSRNOG00000061215	Crym	0.637746	5.36676	7.85425e-05	0.00765409

## Sheet: EW vs. W DEGs
Genes differentially expressed in hypothalamus of exercised Wistar and Wistar rats
Ensembl ID	Gene	logFC	logCPM	PValue	FDR
ENSRNOG00000000640	Egr2	-1.33961	2.31824	4.68119e-08	2.07969e-05
ENSRNOG00000001618	Ripk4	1.60021	0.863028	1.22191e-07	4.73257e-05
ENSRNOG00000002158	Ibsp	-2.15509	0.339043	3.94541e-11	2.38381e-08
ENSRNOG00000002979	Tbx19	0.983002	2.79827	1.49588e-05	0.00358656
ENSRNOG00000003038	Sft2d2	1.37553	1.93097	1.44162e-07	5.44391e-05
ENSRNOG00000003300	Btg2	-0.589967	5.47513	0.000219173	0.0366484
ENSRNOG00000003745	Atf3	-1.87405	2.27959	7.85266e-14	7.90763e-11
ENSRNOG00000003977	Dusp1	-0.836039	6.19959	1.06504e-07	4.34794e-05
ENSRNOG00000004294	Ascl1	1.48065	1.70237	5.4579e-08	2.35548e-05
ENSRNOG00000004327	Ddc	-0.735061	5.89425	3.35556e-06	0.000956335
ENSRNOG00000004642	Lmx1a	-0.839174	3.54103	4.97706e-05	0.0102294
ENSRNOG00000004730	Meis2	1.22641	4.01158	3.28997e-10	1.91135e-07
ENSRNOG00000004834	Llgl2	1.28438	1.30394	5.82691e-06	0.00162992
ENSRNOG00000005154	Fam150b	1.37144	1.82817	4.01751e-07	0.000131923
ENSRNOG00000005404	Rasgrp1	0.613278	5.8409	0.000102363	0.0192215
ENSRNOG00000005600	Nr4a2	-0.784264	4.76245	6.87101e-06	0.00182082
ENSRNOG00000006296	Six6	1.13388	3.14546	2.09852e-07	7.54689e-05
ENSRNOG00000006653	Slc38a4	1.41512	1.64037	2.1484e-07	7.54689e-05
ENSRNOG00000006846	En2	-1.13503	0.921939	0.00014549	0.0261622
ENSRNOG00000007561	Glb1l2	1.09363	1.27601	9.53756e-05	0.0182361
ENSRNOG00000007607	Nr4a1	-0.857995	5.05349	2.88745e-07	9.69221e-05
ENSRNOG00000007830	Apold1	-0.995184	4.70724	1.65473e-08	7.81082e-06
ENSRNOG00000007887	Elk4	0.887397	3.48401	1.86688e-05	0.00427261
ENSRNOG00000008015	Fos	-0.646987	6.33947	3.58438e-05	0.00773459
ENSRNOG00000008046	Tmem30b	1.84822	0.80964	2.59765e-09	1.30792e-06
ENSRNOG00000008449	Neurod4	2.18902	1.46035	9.51365e-15	1.10541e-11
ENSRNOG00000009269	Cga	2.21233	5.78924	4.11063e-41	2.0697e-37
ENSRNOG00000009284	Foxa1	-1.12473	1.77841	3.43522e-05	0.00762166
ENSRNOG00000009565	Pdk4	-0.75641	3.97328	0.000103075	0.0192215
ENSRNOG00000009967	Otof	0.628751	4.96933	0.000203301	0.0348962
ENSRNOG00000010047	Ddit4l	1.37151	0.601836	5.97466e-06	0.00164086
ENSRNOG00000011425	Ptpn3	0.774965	4.09651	4.98763e-05	0.0102294
ENSRNOG00000011815	Sgk1	-0.610964	7.49404	7.69922e-05	0.0149098
ENSRNOG00000011823	Tfap2b	1.12077	1.48255	7.43805e-05	0.0145911
ENSRNOG00000012283	Chrna6	-1.43085	3.64533	7.05445e-12	4.84352e-09
ENSRNOG00000012448	Chrnb3	-0.760991	3.65969	0.000180405	0.031322
ENSRNOG00000012478	Shox2	1.16794	1.25617	4.43722e-05	0.00944002
ENSRNOG00000012481	Ppm1j	1.46091	0.666287	8.57364e-07	0.000275542
ENSRNOG00000012660	Postn	-2.29734	2.44795	8.37027e-20	1.40481e-16
ENSRNOG00000012686	Pomc	4.06693	8.35081	8.57847e-122	1.29578e-117
ENSRNOG00000012723	Trim55	-1.16261	0.273619	0.000267941	0.0426026
ENSRNOG00000013133	Foxa2	-1.25614	0.713621	3.48159e-05	0.00762166
ENSRNOG00000013610	Chrna5	-1.26888	1.2378	9.65318e-06	0.00239035
ENSRNOG00000013928	Dsp	2.39566	2.48301	9.22146e-22	2.3215e-18
ENSRNOG00000014143	Col24a1	2.05359	2.9517	3.94801e-19	5.42134e-16
ENSRNOG00000014252	Irf2bp1	1.64016	3.86745	9.19013e-16	1.15681e-12
ENSRNOG00000014314	Slc39a4	-1.27237	2.03242	1.74157e-06	0.000526128
ENSRNOG00000014350	Cyr61	-0.994975	4.2404	8.36947e-08	3.51169e-05
ENSRNOG00000015155	Tnnc2	-1.3297	2.73492	1.1028e-07	4.38361e-05
ENSRNOG00000015365	Col4a3	0.805717	2.92944	0.000308819	0.0475991
ENSRNOG00000015667	Epcam	2.0983	3.22627	6.46494e-21	1.22066e-17
ENSRNOG00000015867	Chst9	1.62743	1.26519	4.04367e-08	1.8509e-05
ENSRNOG00000016102	Ebf3	-0.602579	5.15732	0.000254062	0.0412646
ENSRNOG00000016385	Gabrd	1.27762	2.16368	1.05991e-06	0.00033354
ENSRNOG00000016793	Tshb	4.40046	3.68881	6.17886e-78	4.66658e-74
ENSRNOG00000017302	Slc6a3	-1.84869	5.99657	6.19167e-30	1.8705e-26
ENSRNOG00000017448	Exoc3l2	1.10501	0.94514	0.000143232	0.0260665
ENSRNOG00000017645	Mylpf	-1.66987	3.06609	3.79717e-12	2.86781e-09
ENSRNOG00000017676	Plvap	0.980611	3.14737	6.80185e-06	0.00182082
ENSRNOG00000017786	Acta1	-1.38594	4.75001	1.39342e-14	1.5034e-11
ENSRNOG00000017854	Ucp2	0.590495	6.51383	0.000159322	0.0279832
ENSRNOG00000019584	Dlk1	1.07343	7.61093	4.92362e-12	3.54149e-09
ENSRNOG00000019745	Actn3	-1.30787	2.16732	1.12169e-06	0.000345778
ENSRNOG00000019857	Gng7	0.651644	5.42116	5.34961e-05	0.0107741
ENSRNOG00000020272	RGD1310209	1.19263	4.96142	2.65524e-12	2.22819e-09
ENSRNOG00000020332	Tnnt3	-2.11805	3.38604	2.09331e-19	3.16194e-16
ENSRNOG00000020410	Th	-1.04316	6.90239	2.9187e-11	1.83695e-08
ENSRNOG00000020650	Slc17a7	0.688026	5.11828	5.01143e-05	0.0102294
ENSRNOG00000020836	Rorc	1.65856	1.10084	1.50287e-08	7.32288e-06
ENSRNOG00000021225	Oxt	1.08167	7.98543	3.20492e-12	2.54791e-09
ENSRNOG00000021434	Usp51	0.939965	2.09048	0.000220788	0.0366484
ENSRNOG00000022777	Six1	1.51964	2.46769	3.95883e-10	2.21475e-07
ENSRNOG00000023688	Drd1	0.76857	3.40958	0.000283788	0.044192
ENSRNOG00000024640	Oacyl	1.77167	2.01471	1.04427e-11	6.85811e-09
ENSRNOG00000025012	Chat	1.31937	0.941983	7.81982e-06	0.00203652
ENSRNOG00000025998	Aim1	1.18806	1.41914	1.75707e-05	0.00408316
ENSRNOG00000027761	Htatsf1	0.806427	6.77673	2.37838e-07	8.16489e-05
ENSRNOG00000030747	LOC690468	-0.704598	3.96713	0.000281573	0.044192
ENSRNOG00000033261	Fam107a	0.568093	6.99349	0.0002478	0.0406849
ENSRNOG00000033570	Arhgap8	1.04981	1.44747	0.000141819	0.0260665
ENSRNOG00000043098	Mt2A	0.666931	5.02074	7.29581e-05	0.0145004
ENSRNOG00000045989	Hba-a3	1.51503	4.6403	0.000211149	0.0358361
ENSRNOG00000046667	Fosb	-1.22058	4.90129	1.21581e-12	1.08028e-09
ENSRNOG00000047040	Lhb	1.31363	3.23028	1.30619e-09	6.80344e-07
ENSRNOG00000047393	Krt18	0.751265	3.53251	0.000263616	0.0423609
ENSRNOG00000047891	Foxg1	1.65063	3.23128	1.35189e-13	1.27627e-10
ENSRNOG00000048672	Tmem207	-1.37585	0.770025	8.44253e-06	0.00216143
ENSRNOG00000049385	Adamtsl4	0.848271	3.95707	1.16137e-05	0.00282944
ENSRNOG00000049695	Myh4	-2.59927	4.4301	8.77189e-39	3.31249e-35
ENSRNOG00000050573	Tgfbr3l	1.68164	1.77214	4.50094e-10	2.4281e-07
ENSRNOG00000052499	Rab27a	0.793894	4.32115	1.54262e-05	0.00364082
ENSRNOG00000056580	En1	-1.3133	1.30589	8.98798e-06	0.00226272
ENSRNOG00000057315	Kcnh3	1.11261	2.73077	2.29139e-06	0.000665605
ENSRNOG00000058186	Errfi1	-0.593071	6.15589	0.000157385	0.0279683
ENSRNOG00000058388	Zfp36	-0.856788	5.14416	2.03272e-07	7.48885e-05
ENSRNOG00000058626	Kcnh8	1.34233	1.31334	2.01765e-06	0.000597581
ENSRNOG00000059219	Myo15a	2.541	2.05273	1.65311e-21	3.56718e-18
ENSRNOG00000062141	Slc18a3	1.16516	1.53965	2.70653e-05	0.00610182
