# Supplementary material for: Transcriptomic responses of hypothalamus to acute exercise in type 2 diabetic Goto-Kakizaki rats
Source: PeerJ. 2019 Sep 24;7:e7743. doi: 10.7717/peerj.7743 (PMC6764357; doi:10.7717/peerj.7743)
Supplement: Table S4 [file peerj-07-7743-s004.xlsx]

## Sheet: GO GK vs. W 
The significantly enriched GO terms and KEGG pathways
GOID	GOTerm	Ontology Source	Term PValue	Term PValue Corrected with Benjamini-Hochberg	Associated Genes Found
GO:0033865	nucleoside bisphosphate metabolic process	GO_BiologicalProcess-EBI-UniProt-GOA_26.01.2019_00h00	3.00882e-05	0.0264776	[Acaa2, Acadsb, Acot4, Acsl5, Acsm5, Crot, Elovl1, Far2, Hmgcs2, Mccc2, Mlycd, Pank1, Pipox]
GO:0034032	purine nucleoside bisphosphate metabolic process	GO_BiologicalProcess-EBI-UniProt-GOA_26.01.2019_00h00	3.00882e-05	0.0264776	[Acaa2, Acadsb, Acot4, Acsl5, Acsm5, Crot, Elovl1, Far2, Hmgcs2, Mccc2, Mlycd, Pank1, Pipox]
GO:0033875	ribonucleoside bisphosphate metabolic process	GO_BiologicalProcess-EBI-UniProt-GOA_26.01.2019_00h00	3.00882e-05	0.0264776	[Acaa2, Acadsb, Acot4, Acsl5, Acsm5, Crot, Elovl1, Far2, Hmgcs2, Mccc2, Mlycd, Pank1, Pipox]
GO:0008625	extrinsic apoptotic signaling pathway via death domain receptors	GO_BiologicalProcess-EBI-UniProt-GOA_26.01.2019_00h00	4.12087e-05	0.0181318	[Atf3, Bad, Bloc1s2, Dedd2, Hmox1, Lgals3, Mal, RGD735029, Sfrp2, Zswim2]
GO:0090083	regulation of inclusion body assembly	GO_BiologicalProcess-EBI-UniProt-GOA_26.01.2019_00h00	0.000111977	0.0328467	[Dnajb1, Dnajb2, Hspa1a, Hspa1b, Sncaip]
GO:0090084	negative regulation of inclusion body assembly	GO_BiologicalProcess-EBI-UniProt-GOA_26.01.2019_00h00	0.000118982	0.026176	[Dnajb1, Dnajb2, Hspa1a, Hspa1b]
GO:0019752	carboxylic acid metabolic process	GO_BiologicalProcess-EBI-UniProt-GOA_26.01.2019_00h00	0.000131826	0.0232013	[Abcg2, Acaa2, Acad9, Acadsb, Acot4, Acsl5, Acsm5, Adh6, Adtrp, Aldh3a2, Alox15, Alox5, Aloxe3, Aspg, C1qtnf9, Crot, Cyp4f6, Dhfr, Dhrs9, Dpyd, Elovl1, Eno4, Ephx2, Gatb, Gclm, Hacd2, Itih2, Itih3, LOC681458, Mccc2, Mecr, Met, Mlycd, Mrs2, Mthfd1l, Nit2, Nr1d1, P4ha1, Pipox, Pla2g3, Plod2, Pnpla3, Pon3, Sars2, Shmt2, Slc27a3, Slc27a6, Slc7a11, Sphk1, Uros]
GO:0006629	lipid metabolic process	GO_BiologicalProcess-EBI-UniProt-GOA_26.01.2019_00h00	0.000153908	0.0225731	[Abca1, Acaa2, Acad9, Acadsb, Acot4, Acsl5, Acsm5, Adh6, Adtrp, Agmo, Akr1b8, Akr1c19, Aldh3a2, Alox15, Aloxe3, Apod, Aspg, Bmp5, C1qtnf9, Cidea, Crot, Csf1r, Cubn, Dhrs9, Ebp, Elovl1, Ephx2, Far2, Galc, Gpld1, Hacd2, Hmgcs2, Hmox1, Isyna1, Kdsr, LOC681458, Lpcat2, Lyn, Mecr, Met, Mlycd, Mogat2, Mppe1, Nr1d1, Phf1, Pip5kl1, Pla2g3, Plcd1, Plcd4, Pnlip, Pnpla1, Pnpla3, RT1-A1, Sgpp1, Slc27a3, Slc2…
GO:0048871	multicellular organismal homeostasis	GO_BiologicalProcess-EBI-UniProt-GOA_26.01.2019_00h00	0.000167656	0.0210767	[Adam8, Alox15, Aloxe3, Ampd3, C1qtnf9, Car2, Cd7, Cidea, Crocc, Csf1r, F2r, Fcgr2a, G0s2, Grhl3, Il18, Lcn2, Mc3r, Met, Metrnl, Mfap2, Nr1d1, Oxt, Pask, Pbld1, Pth1r, Sgpp1, Slc11a1, Slc35d3, Snx10, Ybx2]
GO:0061077	chaperone-mediated protein folding	GO_BiologicalProcess-EBI-UniProt-GOA_26.01.2019_00h00	0.000182496	0.0200746	[Chordc1, Dnajb1, Dnajb2, Hspa13, Hspa1a, Hspa1b, Hspa9, Hspb1]
GO:0044255	cellular lipid metabolic process	GO_BiologicalProcess-EBI-UniProt-GOA_26.01.2019_00h00	0.000207386	0.0202777	[Acaa2, Acad9, Acadsb, Acot4, Acsl5, Acsm5, Adh6, Adtrp, Agmo, Akr1b8, Aldh3a2, Alox15, Aloxe3, Apod, Aspg, C1qtnf9, Crot, Csf1r, Dhrs9, Elovl1, Ephx2, Galc, Gpld1, Hacd2, Hmgcs2, Hmox1, Isyna1, Kdsr, LOC681458, Lpcat2, Lyn, Mecr, Met, Mlycd, Mogat2, Mppe1, Phf1, Pip5kl1, Pla2g3, Plcd4, Pnpla1, Pnpla3, RT1-A1, Slc27a3, Slc27a6, Socs5, Sphk1, Sptlc1, Sptlc3, Srd5a1, Thrsp, Ttr]
GO:0001676	long-chain fatty acid metabolic process	GO_BiologicalProcess-EBI-UniProt-GOA_26.01.2019_00h00	0.000242404	0.0213315	[Acad9, Acot4, Acsl5, Adtrp, Alox15, Aloxe3, Ephx2, Pnpla3, Slc27a3, Slc27a6, Sphk1]
GO:1901617	organic hydroxy compound biosynthetic process	GO_BiologicalProcess-EBI-UniProt-GOA_26.01.2019_00h00	0.00027933	0.0223464	[Alox15, Bmp5, Chrna7, Dhfr, Ebp, Hmgcs2, Isyna1, Nr1d1, P2ry6, Plcd1, Plcd4, Pnpo, Pth1r, Slc7a11, Sphk1, Sptlc1, Tgfb2, Tm7sf2]
GO:0009409	response to cold	GO_BiologicalProcess-EBI-UniProt-GOA_26.01.2019_00h00	0.000323208	0.0237019	[Chrna7, Cirbp, Hspa1a, Hspa1b, Il18, Metrnl, P2rx3, Rbm3, Tgfb2]
GO:0051186	cofactor metabolic process	GO_BiologicalProcess-EBI-UniProt-GOA_26.01.2019_00h00	0.000351332	0.0237825	[Acaa2, Acadsb, Acot4, Acsl5, Acsm5, Alas2, Crot, Cubn, Dhfr, Elovl1, Eno4, Far2, Gclm, Gstm4, Gstt3, Hba-a1, Hbb, Hmgcs2, Hmox1, Hmox2, Hspa9, Mccc2, Mlycd, Mthfd1l, Pank1, Pipox, Pnpo, Shmt2, Slc7a11, Spta1, Uros]
GO:0009266	response to temperature stimulus	GO_BiologicalProcess-EBI-UniProt-GOA_26.01.2019_00h00	0.000360171	0.0226393	[Chordc1, Chrna7, Cirbp, Hmgcs2, Hmox1, Hsf4, Hspa13, Hspa1a, Hspa1b, Hspa9, Il18, Lyn, Metrnl, P2rx3, Phf1, RT1-A1, Rbm3, Socs3, Tgfb2]
GO:0043436	oxoacid metabolic process	GO_BiologicalProcess-EBI-UniProt-GOA_26.01.2019_00h00	0.000372197	0.0218356	[Abcg2, Acaa2, Acad9, Acadsb, Acot4, Acsl5, Acsm5, Adh6, Adtrp, Aldh3a2, Alox15, Alox5, Aloxe3, Aspg, C1qtnf9, Crot, Cyp4f6, Dhfr, Dhrs9, Dpyd, Elovl1, Eno4, Ephx2, Gatb, Gclm, Hacd2, Itih2, Itih3, LOC681458, Mccc2, Mecr, Met, Mlycd, Mrs2, Mthfd1l, Nit2, Nr1d1, P4ha1, Pipox, Pla2g3, Plod2, Pnpla3, Pon3, Sars2, Shmt2, Slc27a3, Slc27a6, Slc7a11, Sphk1, Uros]
GO:0033554	cellular response to stress	GO_BiologicalProcess-EBI-UniProt-GOA_26.01.2019_00h00	0.000383058	0.0210682	[Acaa2, Adam8, Alox15, Ankzf1, Apod, Atf3, Atrip, Bad, Car2, Ccng1, Cdc7, Cdk9, Chordc1, Cirbp, Clca1, Cryab, Cspg5, Dhfr, Dlg1, Dnajb1, Dnajb2, Dnmt3b, Eme2, Fancd2, Fbxo5, Fcgr2b, Gpr37l1, Gtf2h4, Hdac10, Hmox1, Hsf4, Hspa13, Hspa1a, Hspa1b, Hspa9, Hspb1, Il18, Ino80e, Kptn, LOC500077, Lcn2, Lyn, Mapk15, Matn2, Mdc1, Met, Mlh1, Mlkl, Mpg, Msra, Mum1, Neil1, Nprl3, Nrg1, Nucks1, Parg, Pask, Pdgf…
GO:0002819	regulation of adaptive immune response	GO_BiologicalProcess-EBI-UniProt-GOA_26.01.2019_00h00	0.000436032	0.0213171	[Alox15, Cd1d1, Cd48, Fcgr2a, Hspa1a, Hspa1b, Il18, Irf7, Mlh1, Phf1, RT1-A1, RT1-CE10, RT1-CE5, RT1-N2, RT1-N3, Slc11a1, Socs5]
GO:0070841	inclusion body assembly	GO_BiologicalProcess-EBI-UniProt-GOA_26.01.2019_00h00	0.000456301	0.021134	[Dnajb1, Dnajb2, Hspa1a, Hspa1b, Sncaip]
GO:0035458	cellular response to interferon-beta	GO_BiologicalProcess-EBI-UniProt-GOA_26.01.2019_00h00	0.000488357	0.0214877	[Ifit1, LOC100910934, LOC100910979, MGC105567, MGC108823, RGD1309362]
GO:0048002	antigen processing and presentation of peptide antigen	GO_BiologicalProcess-EBI-UniProt-GOA_26.01.2019_00h00	0.000491105	0.0205796	[Ctse, LOC100364500, Phf1, RT1-A1, RT1-CE10, RT1-CE4, RT1-CE5, RT1-N2, RT1-N3, Slc11a1, Tapbp]
GO:0034605	cellular response to heat	GO_BiologicalProcess-EBI-UniProt-GOA_26.01.2019_00h00	0.000535324	0.0214129	[Chordc1, Hmox1, Hsf4, Hspa13, Hspa1a, Hspa1b, Hspa9, Lyn, Phf1, RT1-A1]
GO:0035383	thioester metabolic process	GO_BiologicalProcess-EBI-UniProt-GOA_26.01.2019_00h00	0.000535324	0.0214129	[Acaa2, Acadsb, Acot4, Acsl5, Acsm5, Elovl1, Far2, Hmgcs2, Mlycd, Pipox]
GO:0006637	acyl-CoA metabolic process	GO_BiologicalProcess-EBI-UniProt-GOA_26.01.2019_00h00	0.000535324	0.0214129	[Acaa2, Acadsb, Acot4, Acsl5, Acsm5, Elovl1, Far2, Hmgcs2, Mlycd, Pipox]
GO:0006082	organic acid metabolic process	GO_BiologicalProcess-EBI-UniProt-GOA_26.01.2019_00h00	0.000608569	0.0223142	[Abcg2, Acaa2, Acad9, Acadsb, Acot4, Acsl5, Acsm5, Adh6, Adtrp, Aldh3a2, Alox15, Alox5, Aloxe3, Aspg, C1qtnf9, Crot, Cyp4f6, Dhfr, Dhrs9, Dpyd, Elovl1, Eno4, Ephx2, Gatb, Gclm, Hacd2, Itih2, Itih3, LOC681458, Mccc2, Mecr, Met, Mlycd, Mrs2, Mthfd1l, Nit2, Nr1d1, P4ha1, Pipox, Pla2g3, Plod2, Pnpla3, Pon3, Sars2, Shmt2, Slc27a3, Slc27a6, Slc7a11, Sphk1, Uros]
GO:1901615	organic hydroxy compound metabolic process	GO_BiologicalProcess-EBI-UniProt-GOA_26.01.2019_00h00	0.000614731	0.0216385	[Abca1, Adh6, Akr1b8, Aldh3a2, Alox15, Bmp5, Chrna7, Cubn, Dhfr, Ebp, Ephx2, Hmgcs2, Isyna1, Mrs2, Nr1d1, P2ry6, Plcd1, Plcd4, Pnpo, Pth1r, Slc7a11, Sncaip, Sphk1, Sptlc1, Srd5a1, Tgfb2, Tkfc, Tm7sf2, Ttr]
GO:1903312	negative regulation of mRNA metabolic process	GO_BiologicalProcess-EBI-UniProt-GOA_26.01.2019_00h00	0.000640591	0.0216815	[C1qbp, C4a, Cdk9, Cirbp, Hspa1a, Hspa1b, Pkp1, Slc11a1, Syncrip, Zfp36]
GO:0006631	fatty acid metabolic process	GO_BiologicalProcess-EBI-UniProt-GOA_26.01.2019_00h00	0.00070515	0.0229827	[Acaa2, Acad9, Acadsb, Acot4, Acsl5, Acsm5, Adtrp, Aldh3a2, Alox15, Aloxe3, C1qtnf9, Crot, Elovl1, Ephx2, Hacd2, LOC681458, Mecr, Met, Mlycd, Pla2g3, Pnpla3, Slc27a3, Slc27a6, Sphk1]
GO:0046519	sphingoid metabolic process	GO_BiologicalProcess-EBI-UniProt-GOA_26.01.2019_00h00	0.000830866	0.0252125	[Kdsr, Sphk1, Sptlc1, Sptlc3]
GO:0002682	regulation of immune system process	GO_BiologicalProcess-EBI-UniProt-GOA_26.01.2019_00h00	0.000840845	0.0246648	[Adam8, Adtrp, Alox15, Apod, Bad, C1qbp, C4a, Car2, Ccl3, Cd101, Cd1d1, Cd276, Cd48, Colec11, Csf1r, Dlg1, Esrra, Fancd2, Fcgr2a, Fcgr2b, Gpld1, Gpr183, Hmox1, Hspa1a, Hspa1b, Hspa9, Htra1, Icoslg, Il18, Irf3, Irf7, Lamp1, Lat, Lgals3, Lgals9, Lrch1, Lyn, Met, Mlh1, Nr1d1, Pask, Pdgfd, Phf1, Polr3c, Ptpn22, RT1-A1, RT1-CE10, RT1-CE5, RT1-N2, RT1-N3, Slc11a1, Slc4a1, Slc7a11, Socs5, Spta1, Tgfb2, …
GO:0032787	monocarboxylic acid metabolic process	GO_BiologicalProcess-EBI-UniProt-GOA_26.01.2019_00h00	0.00109464	0.0291905	[Acaa2, Acad9, Acadsb, Acot4, Acsl5, Acsm5, Adh6, Adtrp, Aldh3a2, Alox15, Aloxe3, Aspg, C1qtnf9, Crot, Dhrs9, Elovl1, Eno4, Ephx2, Hacd2, LOC681458, Mecr, Met, Mlycd, Mrs2, Nit2, Nr1d1, Pla2g3, Pnpla3, Pon3, Slc27a3, Slc27a6, Sphk1]
GO:0002824	positive regulation of adaptive immune response based on somatic recombination of immune receptors built from immunoglobulin superfamily domains	GO_BiologicalProcess-EBI-UniProt-GOA_26.01.2019_00h00	0.00110014	0.0284743	[Cd1d1, Hspa1a, Hspa1b, Il18, Mlh1, Phf1, RT1-A1, RT1-CE10, RT1-CE5, RT1-N2, RT1-N3, Slc11a1, Socs5]
GO:0001916	positive regulation of T cell mediated cytotoxicity	GO_BiologicalProcess-EBI-UniProt-GOA_26.01.2019_00h00	0.0011816	0.0288835	[Cd1d1, Hspa1a, Hspa1b, Phf1, RT1-A1, RT1-CE10, RT1-CE5, RT1-N2, RT1-N3]
GO:0006575	cellular modified amino acid metabolic process	GO_BiologicalProcess-EBI-UniProt-GOA_26.01.2019_00h00	0.00119285	0.0283704	[Aldh9a1, Crot, Dhfr, Gclm, Gstm4, Gstt3, Hbb, Mthfd1l, P4ha1, Pipox, Plod2, Shmt2, Slc7a11, Ttr]
GO:0002821	positive regulation of adaptive immune response	GO_BiologicalProcess-EBI-UniProt-GOA_26.01.2019_00h00	0.00124335	0.0287934	[Cd1d1, Hspa1a, Hspa1b, Il18, Mlh1, Phf1, RT1-A1, RT1-CE10, RT1-CE5, RT1-N2, RT1-N3, Slc11a1, Socs5]
GO:0035456	response to interferon-beta	GO_BiologicalProcess-EBI-UniProt-GOA_26.01.2019_00h00	0.00126287	0.0284955	[Ifit1, LOC100910934, LOC100910979, MGC105567, MGC108823, RGD1309362]
GO:0097164	ammonium ion metabolic process	GO_BiologicalProcess-EBI-UniProt-GOA_26.01.2019_00h00	0.00141171	0.0310577	[Aldh9a1, Chrna7, Crot, Gpld1, Hdac10, Kdsr, Lpcat2, Pla2g3, Sncaip, Sphk1, Sptlc1, Sptlc3, Srd5a1, Tgfb2]
GO:0097191	extrinsic apoptotic signaling pathway	GO_BiologicalProcess-EBI-UniProt-GOA_26.01.2019_00h00	0.00146293	0.0313996	[Atf3, Bad, Bloc1s2, Dedd2, G0s2, Gclm, Hmox1, Lcn2, Lgals3, Mal, Met, RGD735029, Sfrp2, Tgfb2, Zswim2]
GO:0051085	chaperone cofactor-dependent protein refolding	GO_BiologicalProcess-EBI-UniProt-GOA_26.01.2019_00h00	0.00154274	0.0315724	[Dnajb1, Hspa13, Hspa1a, Hspa1b, Hspa9]
GO:0002250	adaptive immune response	GO_BiologicalProcess-EBI-UniProt-GOA_26.01.2019_00h00	0.00155058	0.0310115	[Alox15, C1qbp, C4a, Cd1d1, Cd48, Cd7, Dlg1, Fcgr2a, Gpr183, Hspa1a, Hspa1b, Il18, Irf7, Lat, Lyn, Mlh1, Phf1, RT1-A1, RT1-CE10, RT1-CE5, RT1-N2, RT1-N3, Slc11a1, Socs5]
GO:0031343	positive regulation of cell killing	GO_BiologicalProcess-EBI-UniProt-GOA_26.01.2019_00h00	0.00163552	0.0319835	[Bad, Cd1d1, Hspa1a, Hspa1b, Lamp1, Phf1, RT1-A1, RT1-CE10, RT1-CE5, RT1-N2, RT1-N3]
GO:0019372	lipoxygenase pathway	GO_BiologicalProcess-EBI-UniProt-GOA_26.01.2019_00h00	0.00165963	0.0317494	[Alox15, Aloxe3, Pla2g3]
GO:0002711	positive regulation of T cell mediated immunity	GO_BiologicalProcess-EBI-UniProt-GOA_26.01.2019_00h00	0.00169107	0.0316625	[Cd1d1, Hspa1a, Hspa1b, Il18, Phf1, RT1-A1, RT1-CE10, RT1-CE5, RT1-N2, RT1-N3]
GO:0042398	cellular modified amino acid biosynthetic process	GO_BiologicalProcess-EBI-UniProt-GOA_26.01.2019_00h00	0.0018955	0.0340417	[Aldh9a1, Dhfr, Gclm, Mthfd1l, Plod2, Slc7a11]
GO:0002443	leukocyte mediated immunity	GO_BiologicalProcess-EBI-UniProt-GOA_26.01.2019_00h00	0.00208495	0.0359756	[C1qbp, C4a, Ccl3, Cd1d1, Dlg1, Fcgr2a, Hmox1, Hspa1a, Hspa1b, Il18, Irf7, Lamp1, Lat, Lyn, Mlh1, Phf1, Pla2g3, RT1-A1, RT1-CE10, RT1-CE5, RT1-N2, RT1-N3, Slc11a1]
GO:0061436	establishment of skin barrier	GO_BiologicalProcess-EBI-UniProt-GOA_26.01.2019_00h00	0.00229211	0.0387896	[Alox15, Aloxe3, Grhl3, Met]
GO:0030148	sphingolipid biosynthetic process	GO_BiologicalProcess-EBI-UniProt-GOA_26.01.2019_00h00	0.00229435	0.0380948	[Aloxe3, Elovl1, Hacd2, Kdsr, Phf1, RT1-A1, Sphk1, Sptlc1, Sptlc3]
GO:1901570	fatty acid derivative biosynthetic process	GO_BiologicalProcess-EBI-UniProt-GOA_26.01.2019_00h00	0.00230012	0.0374835	[Acsl5, Alox15, Alox5, Elovl1, Far2, Hmgcs2, Sphk1]
GO:0002684	positive regulation of immune system process	GO_BiologicalProcess-EBI-UniProt-GOA_26.01.2019_00h00	0.00241401	0.0386241	[Adam8, Bad, C1qbp, C4a, Car2, Ccl3, Cd101, Cd1d1, Cd276, Colec11, Csf1r, Fcgr2a, Gpld1, Gpr183, Hmox1, Hspa1a, Hspa1b, Icoslg, Il18, Irf3, Irf7, Lamp1, Lgals3, Lgals9, Lyn, Met, Mlh1, Nr1d1, Pask, Pdgfd, Phf1, Polr3c, Ptpn22, RT1-A1, RT1-CE10, RT1-CE5, RT1-N2, RT1-N3, Slc11a1, Slc4a1, Socs5, Spta1, Tgfb2, Tkfc, Vegfb]
GO:0033029	regulation of neutrophil apoptotic process	GO_BiologicalProcess-EBI-UniProt-GOA_26.01.2019_00h00	0.00242995	0.038185	[Fcgr2b, Il18, Slc7a11]
GO:1902041	regulation of extrinsic apoptotic signaling pathway via death domain receptors	GO_BiologicalProcess-EBI-UniProt-GOA_26.01.2019_00h00	0.00243402	0.0375779	[Atf3, Hmox1, Lgals3, Mal, Sfrp2, Zswim2]
GO:0043618	regulation of transcription from RNA polymerase II promoter in response to stress	GO_BiologicalProcess-EBI-UniProt-GOA_26.01.2019_00h00	0.00243402	0.0375779	[Atf3, Dnajb1, Hmox1, Hsf4, Hspa1a, Hspa1b]
GO:0046165	alcohol biosynthetic process	GO_BiologicalProcess-EBI-UniProt-GOA_26.01.2019_00h00	0.00248167	0.0376529	[Bmp5, Dhfr, Ebp, Hmgcs2, Isyna1, P2ry6, Plcd1, Plcd4, Pth1r, Sphk1, Sptlc1, Tm7sf2]
GO:0001912	positive regulation of leukocyte mediated cytotoxicity	GO_BiologicalProcess-EBI-UniProt-GOA_26.01.2019_00h00	0.00258981	0.0379839	[Cd1d1, Hspa1a, Hspa1b, Lamp1, Phf1, RT1-A1, RT1-CE10, RT1-CE5, RT1-N2, RT1-N3]
GO:0006066	alcohol metabolic process	GO_BiologicalProcess-EBI-UniProt-GOA_26.01.2019_00h00	0.00279554	0.0396786	[Abca1, Adh6, Akr1b8, Aldh3a2, Bmp5, Cubn, Dhfr, Ebp, Ephx2, Hmgcs2, Isyna1, P2ry6, Plcd1, Plcd4, Pth1r, Sphk1, Sptlc1, Tkfc, Tm7sf2, Ttr]
GO:0046173	polyol biosynthetic process	GO_BiologicalProcess-EBI-UniProt-GOA_26.01.2019_00h00	0.00283686	0.039626	[Dhfr, Isyna1, P2ry6, Plcd1, Plcd4, Pth1r, Sphk1, Sptlc1]
GO:0097009	energy homeostasis	GO_BiologicalProcess-EBI-UniProt-GOA_26.01.2019_00h00	0.00291997	0.0401497	[Ampd3, C1qtnf9, Metrnl, Pask, Slc35d3]
GO:0031341	regulation of cell killing	GO_BiologicalProcess-EBI-UniProt-GOA_26.01.2019_00h00	0.00294324	0.0398469	[Bad, Cd1d1, Fcgr2a, Hspa1a, Hspa1b, Lamp1, Phf1, RT1-A1, RT1-CE10, RT1-CE5, RT1-N2, RT1-N3]
GO:0043620	regulation of DNA-templated transcription in response to stress	GO_BiologicalProcess-EBI-UniProt-GOA_26.01.2019_00h00	0.00308007	0.0410675	[Atf3, Dnajb1, Hmox1, Hsf4, Hspa1a, Hspa1b]
GO:0002474	antigen processing and presentation of peptide antigen via MHC class I	GO_BiologicalProcess-EBI-UniProt-GOA_26.01.2019_00h00	0.00310024	0.0407195	[LOC100364500, Phf1, RT1-A1, RT1-CE10, RT1-CE4, RT1-CE5, RT1-N2, RT1-N3, Tapbp]
GO:0002708	positive regulation of lymphocyte mediated immunity	GO_BiologicalProcess-EBI-UniProt-GOA_26.01.2019_00h00	0.00311171	0.0402692	[Cd1d1, Hspa1a, Hspa1b, Il18, Lamp1, Mlh1, Phf1, RT1-A1, RT1-CE10, RT1-CE5, RT1-N2, RT1-N3]
GO:0006952	defense response	GO_BiologicalProcess-EBI-UniProt-GOA_26.01.2019_00h00	0.00319948	0.040805	[Abcc9, Adam8, Alox5, Apod, C1qbp, C4a, Ccl3, Cd1d1, Cd276, Chi3l1, Chrna7, Colec11, Csf1r, Cyp4f6, Defb17, Ephx2, F2r, Fancd2, Fcgr2a, Hmox1, Hspa1a, Hspa1b, Htra1, Ifit1, Il17ra, Il18, Irf3, Irf7, Irf8, Kcnj8, LOC100910934, LOC100910979, LOC685067, Lamp1, Lat, Lcn2, Lgals3, Lgals9, Lrsam1, Lyn, MGC105567, MGC108823, Met, Metrnl, Mx2, Nr1d1, Pask, Phf1, Polr3c, Ptpn22, RGD1309362, RT1-A1, Sgpp1,…
GO:0001914	regulation of T cell mediated cytotoxicity	GO_BiologicalProcess-EBI-UniProt-GOA_26.01.2019_00h00	0.00333292	0.0418996	[Cd1d1, Hspa1a, Hspa1b, Phf1, RT1-A1, RT1-CE10, RT1-CE5, RT1-N2, RT1-N3]
GO:0032570	response to progesterone	GO_BiologicalProcess-EBI-UniProt-GOA_26.01.2019_00h00	0.00334565	0.0414672	[Bad, Fosb, Met, Nrg1, Oxt, Socs3, Sphk1, Tgfb2]
GO:0046460	neutral lipid biosynthetic process	GO_BiologicalProcess-EBI-UniProt-GOA_26.01.2019_00h00	0.00337027	0.0411922	[Acsl5, Gpld1, Mogat2, Pnpla3, Thrsp]
GO:0046463	acylglycerol biosynthetic process	GO_BiologicalProcess-EBI-UniProt-GOA_26.01.2019_00h00	0.00337027	0.0411922	[Acsl5, Gpld1, Mogat2, Pnpla3, Thrsp]
GO:0019432	triglyceride biosynthetic process	GO_BiologicalProcess-EBI-UniProt-GOA_26.01.2019_00h00	0.00337027	0.0411922	[Acsl5, Gpld1, Mogat2, Pnpla3, Thrsp]
GO:0042026	protein refolding	GO_BiologicalProcess-EBI-UniProt-GOA_26.01.2019_00h00	0.00337027	0.0411922	[Dnajb2, Hspa13, Hspa1a, Hspa1b, Hspa9]
GO:0097201	negative regulation of transcription from RNA polymerase II promoter in response to stress	GO_BiologicalProcess-EBI-UniProt-GOA_26.01.2019_00h00	0.00338854	0.0408482	[Dnajb1, Hspa1a, Hspa1b]
GO:0032781	positive regulation of ATPase activity	GO_BiologicalProcess-EBI-UniProt-GOA_26.01.2019_00h00	0.00339843	0.0404138	[Dnajb1, Dnajb2, Gtf2h4, Hspa1a, Hspa1b, Ncaph, RT1-CE16]
GO:0051307	meiotic chromosome separation	GO_BiologicalProcess-EBI-UniProt-GOA_26.01.2019_00h00	0.00344822	0.0399268	[Eme2, Mapk15, Mlh1, Ncaph]
GO:0007584	response to nutrient	GO_BiologicalProcess-EBI-UniProt-GOA_26.01.2019_00h00	0.00348133	0.0397867	[Abca1, Abcg2, Acsl5, Alox5, Arsb, C4a, Cubn, Dnmt3b, Dpyd, Gclm, Gdap1, Hmgcs2, Hmox1, Hspa1a, Hspa1b, Hspa9, Myo5b, P2rx3, Sfrp2, Sgpp1, Sphk1, Tgfb2, Tnc, Tpcn2]
GO:0008610	lipid biosynthetic process	GO_BiologicalProcess-EBI-UniProt-GOA_26.01.2019_00h00	0.00376481	0.0424748	[Acsl5, Acsm5, Agmo, Alox15, Aloxe3, Bmp5, Dhrs9, Ebp, Elovl1, Gpld1, Hacd2, Hmgcs2, Isyna1, Kdsr, LOC681458, Lpcat2, Mecr, Mlycd, Mogat2, Mppe1, Nr1d1, Phf1, Pnpla3, RT1-A1, Sphk1, Sptlc1, Sptlc3, Srd5a1, Thrsp, Tm7sf2]
GO:0001910	regulation of leukocyte mediated cytotoxicity	GO_BiologicalProcess-EBI-UniProt-GOA_26.01.2019_00h00	0.00391385	0.0425208	[Cd1d1, Fcgr2a, Hspa1a, Hspa1b, Lamp1, Phf1, RT1-A1, RT1-CE10, RT1-CE5, RT1-N2, RT1-N3]
GO:0030199	collagen fibril organization	GO_BiologicalProcess-EBI-UniProt-GOA_26.01.2019_00h00	0.00407855	0.0437698	[Col11a1, P4ha1, Phf1, Plod2, RT1-A1, Sfrp2, Tgfb2]
GO:0042089	cytokine biosynthetic process	GO_BiologicalProcess-EBI-UniProt-GOA_26.01.2019_00h00	0.00411421	0.0436206	[Cd276, Cx3cr1, Hspb1, Il18, Irf3, Irf7, Tia1, Trib2, Zfp36]
GO:0046653	tetrahydrofolate metabolic process	GO_BiologicalProcess-EBI-UniProt-GOA_26.01.2019_00h00	0.0041522	0.0434993	[Dhfr, Mthfd1l, Pipox, Shmt2]
GO:0050778	positive regulation of immune response	GO_BiologicalProcess-EBI-UniProt-GOA_26.01.2019_00h00	0.00437207	0.0447374	[Adam8, C1qbp, C4a, Cd1d1, Cd276, Colec11, Fcgr2a, Gpld1, Hspa1a, Hspa1b, Icoslg, Il18, Irf3, Irf7, Lamp1, Lgals9, Lyn, Met, Mlh1, Nr1d1, Phf1, Polr3c, Ptpn22, RT1-A1, RT1-CE10, RT1-CE5, RT1-N2, RT1-N3, Slc11a1, Socs5, Tgfb2, Tkfc]
GO:0015909	long-chain fatty acid transport	GO_BiologicalProcess-EBI-UniProt-GOA_26.01.2019_00h00	0.00445497	0.0445497	[Acsl5, Crot, Pla2g3, Pla2r1, Plin2, Slc27a3, Slc27a6]
GO:0002931	response to ischemia	GO_BiologicalProcess-EBI-UniProt-GOA_26.01.2019_00h00	0.00445497	0.0445497	[Csf1r, Cx3cr1, Hspa1a, Hspa1b, Hspb1, Met, Mlycd]
GO:0002456	T cell mediated immunity	GO_BiologicalProcess-EBI-UniProt-GOA_26.01.2019_00h00	0.00452178	0.0447098	[Cd1d1, Dlg1, Hspa1a, Hspa1b, Il18, Phf1, RT1-A1, RT1-CE10, RT1-CE5, RT1-N2, RT1-N3, Slc11a1]
GO:0006643	membrane lipid metabolic process	GO_BiologicalProcess-EBI-UniProt-GOA_26.01.2019_00h00	0.00453801	0.0443716	[Agmo, Aloxe3, Elovl1, Galc, Gpld1, Hacd2, Kdsr, Mppe1, Phf1, RT1-A1, Sphk1, Sptlc1, Sptlc3]
GO:0007288	sperm axoneme assembly	GO_BiologicalProcess-EBI-UniProt-GOA_26.01.2019_00h00	0.00454828	0.0439833	[Cfap157, Dnah1, Pla2g3]
GO:0030432	peristalsis	GO_BiologicalProcess-EBI-UniProt-GOA_26.01.2019_00h00	0.00454828	0.0439833	[Dlg1, P2rx3, Sstr2]
GO:2000402	negative regulation of lymphocyte migration	GO_BiologicalProcess-EBI-UniProt-GOA_26.01.2019_00h00	0.00454828	0.0439833	[Adtrp, Apod, Lrch1]
GO:0001781	neutrophil apoptotic process	GO_BiologicalProcess-EBI-UniProt-GOA_26.01.2019_00h00	0.00454828	0.0439833	[Fcgr2b, Il18, Slc7a11]
GO:0046520	sphingoid biosynthetic process	GO_BiologicalProcess-EBI-UniProt-GOA_26.01.2019_00h00	0.00454828	0.0439833	[Sphk1, Sptlc1, Sptlc3]
GO:2000425	regulation of apoptotic cell clearance	GO_BiologicalProcess-EBI-UniProt-GOA_26.01.2019_00h00	0.00494715	0.0473206	[Alox15, C4a, Hspa1a, Hspa1b]
GO:0044283	small molecule biosynthetic process	GO_BiologicalProcess-EBI-UniProt-GOA_26.01.2019_00h00	0.00501706	0.0474732	[Acsm5, Alox15, Alox5, Aloxe3, Ampd3, Atf3, Bmp5, Dhfr, Dhrs9, Dpyd, Ebp, Elovl1, Eno4, Hacd2, Hmgcs2, Isyna1, LOC681458, Mecr, Mlycd, Mthfd1l, Nr1d1, Nudt16, P2ry6, Plcd1, Plcd4, Plod2, Pnpo, Pth1r, Shmt2, Sphk1, Sptlc1, Tm7sf2, Uros]
GO:0034105	positive regulation of tissue remodeling	GO_BiologicalProcess-EBI-UniProt-GOA_26.01.2019_00h00	0.00501892	0.0469856	[Adam8, Car2, Fcgr2a, Il18, Sgpp1]
GO:0034694	response to prostaglandin	GO_BiologicalProcess-EBI-UniProt-GOA_26.01.2019_00h00	0.00501892	0.0469856	[Hmgcs2, Oxt, P2ry6, Plcd1, Tnc]
GO:0070723	response to cholesterol	GO_BiologicalProcess-EBI-UniProt-GOA_26.01.2019_00h00	0.00501892	0.0469856	[Abca1, Acsl5, Ccl3, Gpld1, Hmgcs2]
GO:0042107	cytokine metabolic process	GO_BiologicalProcess-EBI-UniProt-GOA_26.01.2019_00h00	0.00503171	0.0466095	[Cd276, Cx3cr1, Hspb1, Il18, Irf3, Irf7, Tia1, Trib2, Zfp36]
GO:0033993	response to lipid	GO_BiologicalProcess-EBI-UniProt-GOA_26.01.2019_00h00	0.00505057	0.0458196	[Abca1, Abcg2, Acsl5, Adtrp, Alas2, Alox15, Bad, Car2, Ccl3, Cryab, Cx3cr1, Dnmt3b, Dpyd, Esrra, F2r, Fam107a, Fcgr2a, Fcgr2b, Fosb, Gdap1, Glb1, Gpld1, Gpr83, Hmgcs2, Hspb1, Ifi27, Il18, Irf3, Irf8, Kcnj8, LOC681458, Lcn2, Lyn, Mapk15, Met, Nr1d1, Nr1i2, Nr2c1, Nrg1, Nts, Oxt, P2ry6, Phf1, Plcd1, Pnlip, RT1-A1, RT1-CE16, Rpl32, Sgpp1, Slc11a1, Socs3, Sphk1, Srd5a1, Sstr2, Tgfb2, Tnc, Tpcn2, Uba5…
GO:0009408	response to heat	GO_BiologicalProcess-EBI-UniProt-GOA_26.01.2019_00h00	0.00526448	0.0472729	[Chordc1, Hmox1, Hsf4, Hspa13, Hspa1a, Hspa1b, Hspa9, Lyn, P2rx3, Phf1, RT1-A1, Socs3]
GO:0072687	meiotic spindle	GO_CellularComponent-EBI-UniProt-GOA_26.01.2019_00h00	0.000432584	0.0223926	[Fbxo5, Hspa1a, Hspa1b, Mapk15]
GO:0042611	MHC protein complex	GO_CellularComponent-EBI-UniProt-GOA_26.01.2019_00h00	0.00112364	0.0282516	[LOC100364500, Phf1, RT1-A1, RT1-CE10, RT1-CE4, RT1-CE5, RT1-DMa, RT1-DMb]
GO:0042612	MHC class I protein complex	GO_CellularComponent-EBI-UniProt-GOA_26.01.2019_00h00	0.00308007	0.0410675	[LOC100364500, Phf1, RT1-A1, RT1-CE10, RT1-CE4, RT1-CE5]
GO:0044432	endoplasmic reticulum part	GO_CellularComponent-EBI-UniProt-GOA_26.01.2019_00h00	0.00387096	0.0425806	[Acsl5, Agmo, Aldh3a2, Cd1d1, Cspg5, Cyp4b1, Cyp4f6, Dhrs9, Dlg1, Dnajb2, Dnajc14, Ebp, Elovl1, Fmo5, Grm6, Hacd2, Hdhd2, Hmox1, Hspa13, Kdsr, LOC100910934, LOC100910979, LOC103690028, LOC681458, Lpcat2, MGC105567, MGC108823, Met, Mogat2, Mppe1, P4ha1, Phf1, Plod2, RGD1309362, RT1-A1, Sec16b, Sgpp1, Slc35b3, Sptlc1, Sptlc3, Srd5a1, Stx17, Tapbp, Tm7sf2, Ttyh1, Txndc16]
GO:0002178	palmitoyltransferase complex	GO_CellularComponent-EBI-UniProt-GOA_26.01.2019_00h00	0.00454828	0.0439833	[Golga7b, Sptlc1, Sptlc3]
GO:0042175	nuclear outer membrane-endoplasmic reticulum membrane network	GO_CellularComponent-EBI-UniProt-GOA_26.01.2019_00h00	0.00503425	0.0461473	[Acsl5, Agmo, Aldh3a2, Cd1d1, Cspg5, Cyp4b1, Cyp4f6, Dhrs9, Dlg1, Dnajb2, Dnajc14, Ebp, Elovl1, Fmo5, Grm6, Hacd2, Hdhd2, Hmox1, Kdsr, LOC100910934, LOC100910979, LOC103690028, LOC681458, Lpcat2, MGC105567, MGC108823, Met, Mogat2, Phf1, Plod2, RGD1309362, RT1-A1, Sec16b, Sgpp1, Slc35b3, Sptlc1, Sptlc3, Srd5a1, Stx17, Tapbp, Tm7sf2, Ttyh1]
GO:0005540	hyaluronic acid binding	GO_MolecularFunction-EBI-UniProt-GOA_26.01.2019_00h00	0.000456301	0.021134	[Bcan, C1qbp, Layn, Ncan, Stab2]
GO:0044183	protein binding involved in protein folding	GO_MolecularFunction-EBI-UniProt-GOA_26.01.2019_00h00	0.000574945	0.0219979	[Hspa13, Hspa1a, Hspa1b, Hspa9, Hspb1]
GO:0016298	lipase activity	GO_MolecularFunction-EBI-UniProt-GOA_26.01.2019_00h00	0.000735086	0.0231027	[Aspg, Gpld1, Hmox1, Pla2g3, Plcd1, Plcd4, Pld6, Pnlip, Pnpla1, Pnpla3, Sec23ip]
GO:0004064	arylesterase activity	GO_MolecularFunction-EBI-UniProt-GOA_26.01.2019_00h00	0.00106271	0.0301671	[Apmap, Car2, Pon3]
GO:0004620	phospholipase activity	GO_MolecularFunction-EBI-UniProt-GOA_26.01.2019_00h00	0.00108058	0.0297161	[Aspg, Gpld1, Hmox1, Pla2g3, Plcd1, Plcd4, Pld6, Pnpla3, Sec23ip]
GO:0016627	oxidoreductase activity, acting on the CH-CH group of donors	GO_MolecularFunction-EBI-UniProt-GOA_26.01.2019_00h00	0.00149808	0.0313884	[Acad9, Acadsb, Dpyd, Dus3l, Mecr, Srd5a1, Tm7sf2]
GO:0030492	hemoglobin binding	GO_MolecularFunction-EBI-UniProt-GOA_26.01.2019_00h00	0.00165963	0.0317494	[Ahsp, Cubn, Hbb]
GO:0008168	methyltransferase activity	GO_MolecularFunction-EBI-UniProt-GOA_26.01.2019_00h00	0.00188503	0.0345589	[Asmt, C4a, Dnmt3b, Fdxacb1, Hspa1a, Hspa1b, Mettl17, Mettl18, Mettl2b, Mettl7a, Prdm9, Shmt2, Thumpd2, Trmt10a, Trmt2a]
GO:0043168	anion binding	GO_MolecularFunction-EBI-UniProt-GOA_26.01.2019_00h00	0.00198287	0.0348986	[Abca1, Abcb10, Abcc9, Abcg2, Abcg3l3, Acad9, Acadsb, Acbd4, Acsl5, Acsm5, Adap2, Akr1b8, Alas2, Alox15, Anxa8, Atp11b, Atp2c2, Bad, Baiap2l2, Bcan, C1qbp, Ccl3, Cdc7, Cdk9, Cdkl4, Chordc1, Col11a1, Cpne8, Csf1r, Dhfr, Dnah1, Dnah12, Dnah17, Dnah8, Dpyd, Dus3l, Fcho2, Fmo5, Gatb, Gltpd2, Gstm4, Hspa13, Hspa1a, Hspa1b, Hspa9, Kcnj8, LOC100910934, LOC100910979, LOC103690086, LOC103691744, LOC300308…
GO:0015645	fatty acid ligase activity	GO_MolecularFunction-EBI-UniProt-GOA_26.01.2019_00h00	0.00229211	0.0387896	[Acsl5, Acsm5, Slc27a3, Slc27a6]
GO:0016408	C-acyltransferase activity	GO_MolecularFunction-EBI-UniProt-GOA_26.01.2019_00h00	0.00229211	0.0387896	[Acaa2, Acsm5, Sptlc1, Sptlc3]
GO:0016702	oxidoreductase activity, acting on single donors with incorporation of molecular oxygen, incorporation of two atoms of oxygen	GO_MolecularFunction-EBI-UniProt-GOA_26.01.2019_00h00	0.00251479	0.0375087	[Alox15, Alox5, Aloxe3, P4ha1, Pir]
GO:0046872	metal ion binding	GO_MolecularFunction-EBI-UniProt-GOA_26.01.2019_00h00	0.00259368	0.0374171	[Acsm5, Adam8, Adap2, Adh6, Agbl3, Agmo, Alox15, Alox5, Aloxe3, Ampd3, Ankzf1, Anxa8, Arsb, Aspa, Atp11b, Atp2c2, Bcan, C4a, Capn12, Car2, Chordc1, Col11a1, Colec11, Cpped1, Cryab, Cubn, Cyp4b1, Cyp4f6, Dnpep, Dpyd, Dus3l, Egr2, Eno4, Enpp5, Ephx2, Eri2, Esrra, Fbln2, Fth1, Galnt3, Galt, Gyg1, Harbi1, Hba-a1, Hbb, Hdac10, Hdhd2, Heph, Hmox1, Hmox2, Hspa1a, Hspa1b, LOC100909824, LOC100910577, LOC1…
GO:0016701	oxidoreductase activity, acting on single donors with incorporation of molecular oxygen	GO_MolecularFunction-EBI-UniProt-GOA_26.01.2019_00h00	0.00291997	0.0401497	[Alox15, Alox5, Aloxe3, P4ha1, Pir]
GO:0043169	cation binding	GO_MolecularFunction-EBI-UniProt-GOA_26.01.2019_00h00	0.00343656	0.0403223	[Acsm5, Adam8, Adap2, Adh6, Agbl3, Agmo, Alas2, Alox15, Alox5, Aloxe3, Ampd3, Ankzf1, Anxa8, Arsb, Aspa, Atp11b, Atp2c2, Bcan, C4a, Capn12, Car2, Chordc1, Chrna7, Col11a1, Colec11, Cpped1, Cryab, Cubn, Cyp4b1, Cyp4f6, Dnpep, Dpyd, Dus3l, Egr2, Eno4, Enpp5, Ephx2, Eri2, Esrra, Fbln2, Fth1, Galnt3, Galt, Gyg1, Harbi1, Hba-a1, Hbb, Hdac10, Hdhd2, Heph, Hmox1, Hmox2, Hspa1a, Hspa1b, LOC100909824, LOC…
GO:0016628	oxidoreductase activity, acting on the CH-CH group of donors, NAD or NADP as acceptor	GO_MolecularFunction-EBI-UniProt-GOA_26.01.2019_00h00	0.00344822	0.0399268	[Dpyd, Mecr, Srd5a1, Tm7sf2]
GO:0001671	ATPase activator activity	GO_MolecularFunction-EBI-UniProt-GOA_26.01.2019_00h00	0.0038684	0.043091	[Dnajb1, Dnajb2, Gtf2h4, Ncaph, RT1-CE16]
GO:0051861	glycolipid binding	GO_MolecularFunction-EBI-UniProt-GOA_26.01.2019_00h00	0.0041522	0.0434993	[Hspa1a, Hspa1b, Lyn, Mppe1]
GO:0016741	transferase activity, transferring one-carbon groups	GO_MolecularFunction-EBI-UniProt-GOA_26.01.2019_00h00	0.00422432	0.0437341	[Asmt, C4a, Dnmt3b, Fdxacb1, Hspa1a, Hspa1b, Mettl17, Mettl18, Mettl2b, Mettl7a, Prdm9, Shmt2, Thumpd2, Trmt10a, Trmt2a]
GO:0016747	transferase activity, transferring acyl groups other than amino-acyl groups	GO_MolecularFunction-EBI-UniProt-GOA_26.01.2019_00h00	0.00442304	0.0447388	[Acaa2, Acsm5, Alas2, Crot, Elovl1, Golga7b, Lpcat2, Mogat1, Mogat2, Naa50, Nat8f1, Osgep, Pnpla3, Sptlc1, Sptlc3, Taf12]
GO:0016405	CoA-ligase activity	GO_MolecularFunction-EBI-UniProt-GOA_26.01.2019_00h00	0.00494715	0.0473206	[Acsl5, Acsm5, Slc27a3, Slc27a6]
GO:0051787	misfolded protein binding	GO_MolecularFunction-EBI-UniProt-GOA_26.01.2019_00h00	0.00494715	0.0473206	[Hspa13, Hspa1a, Hspa1b, Hspa9]

## Sheet: KEGG GK vs. W
GOID	GOTerm	Term PValue	Term PValue Corrected with Benjamini-Hochberg	Associated Genes Found
KEGG:04612	Antigen processing and presentation	9.32793e-06	0.000755563	[Hspa1a, Hspa1b, RT1-A1, RT1-CE10, RT1-CE16, RT1-CE4, RT1-CE5, RT1-CE7, RT1-DMa, RT1-DMb, RT1-N2, RT1-N3, Tapbp]
KEGG:05332	Graft-versus-host disease	4.64115e-05	0.00187966	[RT1-A1, RT1-CE10, RT1-CE16, RT1-CE4, RT1-CE5, RT1-CE7, RT1-DMa, RT1-DMb, RT1-N2, RT1-N3]
KEGG:05330	Allograft rejection	6.67122e-05	0.00180123	[RT1-A1, RT1-CE10, RT1-CE16, RT1-CE4, RT1-CE5, RT1-CE7, RT1-DMa, RT1-DMb, RT1-N2, RT1-N3]
KEGG:04940	Type I diabetes mellitus	0.000130516	0.00264295	[RT1-A1, RT1-CE10, RT1-CE16, RT1-CE4, RT1-CE5, RT1-CE7, RT1-DMa, RT1-DMb, RT1-N2, RT1-N3]
KEGG:05416	Viral myocarditis	0.000134363	0.00217669	[Itgal, RT1-A1, RT1-CE10, RT1-CE16, RT1-CE4, RT1-CE5, RT1-CE7, RT1-DMa, RT1-DMb, RT1-N2, RT1-N3]
KEGG:05320	Autoimmune thyroid disease	0.000145025	0.00195784	[RT1-A1, RT1-CE10, RT1-CE16, RT1-CE4, RT1-CE5, RT1-CE7, RT1-DMa, RT1-DMb, RT1-N2, RT1-N3]
KEGG:04514	Cell adhesion molecules (CAMs)	0.000258916	0.00299603	[Cd276, Cldn11, Icoslg, Itgal, RT1-A1, RT1-CE10, RT1-CE16, RT1-CE4, RT1-CE5, RT1-CE7, RT1-DMa, RT1-DMb, RT1-N2, RT1-N3, Selplg]
KEGG:04145	Phagosome	0.000298226	0.00301953	[Colec11, Fcgr2a, Fcgr2b, Lamp1, Pla2r1, RT1-A1, RT1-CE10, RT1-CE16, RT1-CE4, RT1-CE5, RT1-CE7, RT1-DMa, RT1-DMb, RT1-N2, RT1-N3, Tubb2b]
KEGG:05168	Herpes simplex infection	0.000312178	0.0028096	[C1qbp, Ifit1, Irf3, Irf7, RT1-A1, RT1-CE10, RT1-CE16, RT1-CE4, RT1-CE5, RT1-CE7, RT1-DMa, RT1-DMb, RT1-N2, RT1-N3, Socs3, Srsf5, Taf13]
KEGG:00561	Glycerolipid metabolism	0.000495531	0.0040138	[Akr1b8, Aldh3a2, Aldh9a1, Mogat1, Mogat2, Pnlip, Pnpla3, Tkfc]
KEGG:00600	Sphingolipid metabolism	0.000596085	0.00438935	[Galc, Glb1, Kdsr, Sgpp1, Sphk1, Sptlc1, Sptlc3]
KEGG:04216	Ferroptosis	0.00129235	0.00872337	[Acsl5, Alox15, Fth1, Gclm, Hmox1, Slc7a11]
KEGG:05150	Staphylococcus aureus infection	0.00192554	0.0119976	[C4a, Fcgr2a, Fcgr2b, Itgal, Krt10, RT1-DMa, RT1-DMb, Selplg]
KEGG:05203	Viral carcinogenesis	0.0023305	0.0134836	[Bad, Dlg1, Egr2, Gtf2h4, Hdac10, Irf3, Irf7, Lyn, RT1-A1, RT1-CE10, RT1-CE16, RT1-CE4, RT1-CE5, RT1-CE7, RT1-N2, RT1-N3]
KEGG:00071	Fatty acid degradation	0.00265584	0.0143415	[Acaa2, Acadsb, Acsl5, Adh6, Aldh3a2, Aldh9a1]
KEGG:05169	Epstein-Barr virus infection	0.00271867	0.0137633	[Irf3, Irf7, Itgal, Lyn, Mapk12, RT1-A1, RT1-CE10, RT1-CE16, RT1-CE4, RT1-CE5, RT1-CE7, RT1-DMa, RT1-DMb, RT1-N2, RT1-N3, Tapbp]
KEGG:00410	beta-Alanine metabolism	0.00281076	0.0133925	[Aldh3a2, Aldh9a1, Dpyd, LOC688778, Mlycd]
KEGG:00062	Fatty acid elongation	0.00321592	0.0144716	[Acaa2, Acot4, Elovl1, Hacd2, Mecr]
KEGG:04146	Peroxisome	0.00482286	0.0205606	[Acsl5, Crot, Ephx2, Far2, Mlycd, Mpv17l, Pex6, Pipox]
KEGG:00340	Histidine metabolism	0.00527277	0.0213547	[Aldh3a2, Aldh9a1, Aspa, LOC688778]
KEGG:04623	Cytosolic DNA-sensing pathway	0.0064173	0.0247524	[Il18, Irf3, Irf7, Polr3c, Polr3e, Polr3k]
KEGG:00280	Valine, leucine and isoleucine degradation	0.0064173	0.0247524	[Acaa2, Acadsb, Aldh3a2, Aldh9a1, Hmgcs2, Mccc2]
KEGG:00860	Porphyrin and chlorophyll metabolism	0.00730466	0.0268944	[Alas2, Heph, Hmox1, Hmox2, Uros]
KEGG:05144	Malaria	0.00895974	0.0315539	[Hba-a1, Hbb, Il18, Itgal, Met, Tgfb2]
KEGG:05152	Tuberculosis	0.0131678	0.0444414	[Bad, Fcgr2a, Fcgr2b, Hspa9, Il18, Lamp1, Mapk12, Pla2r1, RT1-DMa, RT1-DMb, Sphk1, Tgfb2]
KEGG:05166	Human T-cell leukemia virus 1 infection	0.0133133	0.0431351	[Dlg1, Egr2, Itgal, RT1-A1, RT1-CE10, RT1-CE16, RT1-CE4, RT1-CE5, RT1-CE7, RT1-DMa, RT1-DMb, RT1-N2, RT1-N3, Tgfb2, Zfp36]
KEGG:05167	Kaposi sarcoma-associated herpesvirus infection	0.0133206	0.0414988	[Irf3, Irf7, Lyn, Mapk12, RT1-A1, RT1-CE10, RT1-CE16, RT1-CE4, RT1-CE5, RT1-CE7, RT1-N2, RT1-N3, Zfp36]
KEGG:04380	Osteoclast differentiation	0.0155578	0.0466734	[Csf1r, Fcgr2a, Fcgr2b, Fosb, Lilrb3l, Mapk12, Pirb, Socs3, Tgfb2]
KEGG:00670	One carbon pool by folate	0.0156784	0.0453555	[Dhfr, Mthfd1l, Shmt2]
KEGG:01040	Biosynthesis of unsaturated fatty acids	0.0164494	0.0459448	[Acot4, Elovl1, Hacd2, LOC681458]
KEGG:05170	Human immunodeficiency virus 1 infection	0.0195363	0.0494512	[Ap1s3, Bad, Cul5, Irf3, Mapk12, RT1-A1, RT1-CE10, RT1-CE16, RT1-CE4, RT1-CE5, RT1-CE7, RT1-N2, RT1-N3, Tapbp]

## Sheet: GO EGK vs. GK
GOID	GOTerm	Ontology Source	Term PValue	Term PValue Corrected with Benjamini-Hochberg	Associated Genes Found
GO:0032787	monocarboxylic acid metabolic process	GO_BiologicalProcess-EBI-UniProt-GOA_26.01.2019_00h00	1.05935e-13	2.92381e-11	[Aacs, Abhd5, Acacb, Acsl5, Actn3, Adh6, Adtrp, Aldh3a2, Amacr, C3, Cd36, Crem, Elovl1, Elovl5, Eno3, Fabp4, Hacd2, LOC681458, Lpl, Pgam2, Pnpla3, Pon3, Ptgr1, Ptgs2, Slc1a3, Snca, Sphk1, Ugt1a2]
GO:0006631	fatty acid metabolic process	GO_BiologicalProcess-EBI-UniProt-GOA_26.01.2019_00h00	1.67736e-11	2.31476e-09	[Aacs, Abhd5, Acacb, Acsl5, Adtrp, Aldh3a2, Amacr, C3, Cd36, Crem, Elovl1, Elovl5, Fabp4, Hacd2, LOC681458, Lpl, Pnpla3, Ptgr1, Ptgs2, Snca, Sphk1]
GO:0030239	myofibril assembly	GO_BiologicalProcess-EBI-UniProt-GOA_26.01.2019_00h00	4.00146e-10	2.76101e-08	[Acta1, Casq1, Klhl41, Krt8, Mef2c, Mybpc2, Mylpf, Neb, Nrap, Tnnt3]
GO:0044057	regulation of system process	GO_BiologicalProcess-EBI-UniProt-GOA_26.01.2019_00h00	1.07436e-09	4.23604e-08	[Actn3, Adora2a, Aqp1, Baiap2, Casq1, Cck, Drd1, Homer1, Hspa1a, Hspa1b, Inhba, Mef2c, Mlip, Mt2A, Mylpf, Nov, Ptgs2, Ptk2b, Sphk1, Srl, Tmem100, Tmem38a, Tnnc2, Tnnt3]
GO:0006665	sphingolipid metabolic process	GO_BiologicalProcess-EBI-UniProt-GOA_26.01.2019_00h00	2.93294e-09	8.99435e-08	[Acer3, Cers2, Crem, Elovl1, Elovl5, Hacd2, Kdsr, Neu2, Sphk1, Sptlc1, Sptlc3, Sptssa]
GO:0055002	striated muscle cell development	GO_BiologicalProcess-EBI-UniProt-GOA_26.01.2019_00h00	3.2853e-09	9.06742e-08	[Acta1, Actn3, Casq1, Homer1, Klhl41, Krt8, Mef2c, Mybpc2, Mylpf, Neb, Nrap, Sdc1, Tnnt3]
GO:0008610	lipid biosynthetic process	GO_BiologicalProcess-EBI-UniProt-GOA_26.01.2019_00h00	4.32337e-09	1.08477e-07	[Abhd5, Acacb, Acer3, Acsl5, Amacr, C3, Cers2, Cga, Elovl1, Elovl5, Hacd2, Kdsr, LOC681458, Lpl, Pnpla3, Ptgs2, Sphk1, Sptlc1, Sptlc3, Sptssa, Srl, Thrsp]
GO:0055001	muscle cell development	GO_BiologicalProcess-EBI-UniProt-GOA_26.01.2019_00h00	5.93126e-09	1.36419e-07	[Acta1, Actn3, Casq1, Homer1, Klhl41, Krt8, Mef2c, Mybpc2, Mylpf, Neb, Nrap, Sdc1, Tnnt3]
GO:0030148	sphingolipid biosynthetic process	GO_BiologicalProcess-EBI-UniProt-GOA_26.01.2019_00h00	9.39536e-09	1.99471e-07	[Acer3, Cers2, Elovl1, Elovl5, Hacd2, Kdsr, Sphk1, Sptlc1, Sptlc3, Sptssa]
GO:0051924	regulation of calcium ion transport	GO_BiologicalProcess-EBI-UniProt-GOA_26.01.2019_00h00	2.66614e-08	5.25611e-07	[Adora2a, Akap5, Arc, Camk2a, Casq1, Drd1, Homer1, Hrc, Hspa1a, Hspa1b, Ptgs2, Ptk2b, Snca, Tmem38a, Wfs1]
GO:0051146	striated muscle cell differentiation	GO_BiologicalProcess-EBI-UniProt-GOA_26.01.2019_00h00	2.94496e-08	5.41873e-07	[Acta1, Actn3, Casq1, Homer1, Klhl41, Krt8, Mef2c, Mybpc2, Mylpf, Neb, Neu2, Nov, Nrap, Sdc1, Tnnt3]
GO:0010927	cellular component assembly involved in morphogenesis	GO_BiologicalProcess-EBI-UniProt-GOA_26.01.2019_00h00	3.22752e-08	5.56747e-07	[Acta1, Casq1, Klhl41, Krt8, Mef2c, Mybpc2, Mylpf, Neb, Nrap, Tnnt3]
GO:0010959	regulation of metal ion transport	GO_BiologicalProcess-EBI-UniProt-GOA_26.01.2019_00h00	3.95622e-08	6.42305e-07	[Adora2a, Akap5, Arc, Camk2a, Casq1, Drd1, Homer1, Hrc, Hspa1a, Hspa1b, Mt2A, Ptgs2, Ptk2b, Slc31a2, Snca, Tesc, Tmem38a, Wfs1]
GO:0051235	maintenance of location	GO_BiologicalProcess-EBI-UniProt-GOA_26.01.2019_00h00	4.63318e-08	7.10421e-07	[Abhd5, Acacb, Alb, Arc, C3, Casq1, Cidea, Drd1, Lpl, Plin2, Ptk2b, Slc17a7, Slc30a3, Snca, Srl, Tmem38a]
GO:0043270	positive regulation of ion transport	GO_BiologicalProcess-EBI-UniProt-GOA_26.01.2019_00h00	5.27359e-08	7.66058e-07	[Acsl5, Adora2a, Akap5, Arc, Camk2a, Casq1, Cck, Chrm1, Drd1, Homer1, Hspa1a, Hspa1b, Pla2r1, Snca, Tesc, Wfs1]
GO:0009612	response to mechanical stimulus	GO_BiologicalProcess-EBI-UniProt-GOA_26.01.2019_00h00	5.5052e-08	7.59717e-07	[Acta1, Ano3, Aqp1, Cd36, Fosb, Hspa1a, Hspa1b, Kcnj4, Meis2, Myh4, Pde2a, Postn, Ptgs2, Ptk2b, Slc1a3]
GO:0006643	membrane lipid metabolic process	GO_BiologicalProcess-EBI-UniProt-GOA_26.01.2019_00h00	8.32709e-08	1.09442e-06	[Acer3, Cers2, Crem, Elovl1, Elovl5, Hacd2, Kdsr, Neu2, Sphk1, Sptlc1, Sptlc3, Sptssa]
GO:0046519	sphingoid metabolic process	GO_BiologicalProcess-EBI-UniProt-GOA_26.01.2019_00h00	1.18371e-07	1.36126e-06	[Acer3, Kdsr, Sphk1, Sptlc1, Sptlc3]
GO:0048747	muscle fiber development	GO_BiologicalProcess-EBI-UniProt-GOA_26.01.2019_00h00	1.2783e-07	1.41124e-06	[Acta1, Actn3, Homer1, Klhl41, Mybpc2, Mylpf, Neb, Nrap]
GO:0048167	regulation of synaptic plasticity	GO_BiologicalProcess-EBI-UniProt-GOA_26.01.2019_00h00	1.4352e-07	1.52352e-06	[Adora2a, Arc, Baiap2, Camk2a, Drd1, Itpka, Lzts1, Mef2c, Plk2, Ptgs2, Ptk2b, Rgs14, Snca]
GO:0003012	muscle system process	GO_BiologicalProcess-EBI-UniProt-GOA_26.01.2019_00h00	1.82066e-07	1.86112e-06	[Acta1, Actn3, Casq1, Drd1, Homer1, Mef2c, Mlip, Mybpc2, Myh4, Mylpf, Pgam2, Ptgs2, Sphk1, Srl, Tmem38a, Tnnc2, Tnnt3]
GO:0072330	monocarboxylic acid biosynthetic process	GO_BiologicalProcess-EBI-UniProt-GOA_26.01.2019_00h00	1.95693e-07	1.92897e-06	[Acacb, Actn3, Amacr, Elovl1, Elovl5, Eno3, Hacd2, LOC681458, Lpl, Pgam2, Ptgs2, Slc1a3, Sphk1]
GO:0046467	membrane lipid biosynthetic process	GO_BiologicalProcess-EBI-UniProt-GOA_26.01.2019_00h00	3.3087e-07	3.14897e-06	[Acer3, Cers2, Elovl1, Elovl5, Hacd2, Kdsr, Sphk1, Sptlc1, Sptlc3, Sptssa]
GO:0042692	muscle cell differentiation	GO_BiologicalProcess-EBI-UniProt-GOA_26.01.2019_00h00	3.61951e-07	3.32995e-06	[Acta1, Actn3, Casq1, Homer1, Klhl41, Krt8, Mef2c, Mybpc2, Mylpf, Neb, Neu2, Nov, Nrap, Sdc1, Tnnt3]
GO:0006936	muscle contraction	GO_BiologicalProcess-EBI-UniProt-GOA_26.01.2019_00h00	5.05387e-07	4.49957e-06	[Actn3, Casq1, Drd1, Homer1, Mybpc2, Myh4, Mylpf, Pgam2, Ptgs2, Sphk1, Srl, Tmem38a, Tnnc2, Tnnt3]
GO:0050890	cognition	GO_BiologicalProcess-EBI-UniProt-GOA_26.01.2019_00h00	7.98949e-07	6.89093e-06	[Arc, Cck, Chrm1, Drd1, Gpr88, Hspa1a, Hspa1b, Mef2c, Meis2, Plk2, Ppp1r1b, Ptgs2, Rgs14, Slc17a7, Tbr1]
GO:0019934	cGMP-mediated signaling	GO_BiologicalProcess-EBI-UniProt-GOA_26.01.2019_00h00	8.78102e-07	7.34412e-06	[Aqp1, Mt2A, Pde10a, Pde2a, Ptk2b, Srl]
GO:0007611	learning or memory	GO_BiologicalProcess-EBI-UniProt-GOA_26.01.2019_00h00	1.03962e-06	8.43929e-06	[Arc, Cck, Drd1, Gpr88, Hspa1a, Hspa1b, Mef2c, Meis2, Plk2, Ppp1r1b, Ptgs2, Rgs14, Slc17a7, Tbr1]
GO:0031032	actomyosin structure organization	GO_BiologicalProcess-EBI-UniProt-GOA_26.01.2019_00h00	1.14961e-06	9.06551e-06	[Acta1, Casq1, Klhl41, Krt8, Mef2c, Mybpc2, Mylpf, Neb, Nrap, Ptk2b, Tnnt3]
GO:0048520	positive regulation of behavior	GO_BiologicalProcess-EBI-UniProt-GOA_26.01.2019_00h00	1.22569e-06	9.39692e-06	[Adora2a, Alb, Cck, Drd1, Mef2c, Mt2A]
GO:0019216	regulation of lipid metabolic process	GO_BiologicalProcess-EBI-UniProt-GOA_26.01.2019_00h00	1.63457e-06	1.2193e-05	[Abhd5, Acacb, Acsl5, Bcl11b, C3, Cd36, Cga, Cidea, Elovl5, Ptgs2, Ptk2b, Snca, Srl, Thrsp]
GO:0048148	behavioral response to cocaine	GO_BiologicalProcess-EBI-UniProt-GOA_26.01.2019_00h00	1.67831e-06	1.21899e-05	[Drd1, Homer1, Hspa1a, Hspa1b, Ppp1r1b, Snca]
GO:0007613	memory	GO_BiologicalProcess-EBI-UniProt-GOA_26.01.2019_00h00	2.13641e-06	1.51192e-05	[Arc, Cck, Drd1, Hspa1a, Hspa1b, Plk2, Ppp1r1b, Ptgs2, Rgs14, Slc17a7]
GO:0046520	sphingoid biosynthetic process	GO_BiologicalProcess-EBI-UniProt-GOA_26.01.2019_00h00	2.19972e-06	1.51781e-05	[Acer3, Sphk1, Sptlc1, Sptlc3]
GO:0045214	sarcomere organization	GO_BiologicalProcess-EBI-UniProt-GOA_26.01.2019_00h00	2.99365e-06	2.01524e-05	[Casq1, Klhl41, Krt8, Mef2c, Mybpc2, Tnnt3]
GO:0046173	polyol biosynthetic process	GO_BiologicalProcess-EBI-UniProt-GOA_26.01.2019_00h00	5.92063e-06	3.80022e-05	[Acer3, Itpka, Mas1, Ptk2b, Snca, Sphk1, Sptlc1]
GO:0051928	positive regulation of calcium ion transport	GO_BiologicalProcess-EBI-UniProt-GOA_26.01.2019_00h00	6.14905e-06	3.85713e-05	[Akap5, Camk2a, Casq1, Drd1, Homer1, Hspa1a, Hspa1b, Snca, Wfs1]
GO:0050806	positive regulation of synaptic transmission	GO_BiologicalProcess-EBI-UniProt-GOA_26.01.2019_00h00	6.21168e-06	3.80983e-05	[Adora2a, Arc, Baiap2, Drd1, Plk2, Ptgs2, Ptk2b, Rgs14, Slc1a3, Snca, Sphk1]
GO:0014074	response to purine-containing compound	GO_BiologicalProcess-EBI-UniProt-GOA_26.01.2019_00h00	8.37279e-06	4.91679e-05	[Aacs, Adora2a, Alas1, Aqp1, Fosb, Pde2a, Ptgs2, Ptk2b, Sdc1, Sphk1, Tmem38a]
GO:0046460	neutral lipid biosynthetic process	GO_BiologicalProcess-EBI-UniProt-GOA_26.01.2019_00h00	1.0407e-05	5.86189e-05	[Acsl5, C3, Lpl, Pnpla3, Thrsp]
GO:0046463	acylglycerol biosynthetic process	GO_BiologicalProcess-EBI-UniProt-GOA_26.01.2019_00h00	1.0407e-05	5.86189e-05	[Acsl5, C3, Lpl, Pnpla3, Thrsp]
GO:0019432	triglyceride biosynthetic process	GO_BiologicalProcess-EBI-UniProt-GOA_26.01.2019_00h00	1.0407e-05	5.86189e-05	[Acsl5, C3, Lpl, Pnpla3, Thrsp]
GO:0035336	long-chain fatty-acyl-CoA metabolic process	GO_BiologicalProcess-EBI-UniProt-GOA_26.01.2019_00h00	1.17013e-05	6.33249e-05	[Acsl5, Elovl1, Elovl5, Far2]
GO:0006638	neutral lipid metabolic process	GO_BiologicalProcess-EBI-UniProt-GOA_26.01.2019_00h00	1.30081e-05	6.90428e-05	[Abhd5, Acsl5, C3, Cd36, Lpl, Pnpla3, Snca, Thrsp]
GO:1901570	fatty acid derivative biosynthetic process	GO_BiologicalProcess-EBI-UniProt-GOA_26.01.2019_00h00	1.3936e-05	7.25725e-05	[Acsl5, Elovl1, Elovl5, Far2, Ptgs2, Sphk1]
GO:0035384	thioester biosynthetic process	GO_BiologicalProcess-EBI-UniProt-GOA_26.01.2019_00h00	1.4167e-05	7.2409e-05	[Acacb, Acsl5, Elovl1, Elovl5, Snca]
GO:0071616	acyl-CoA biosynthetic process	GO_BiologicalProcess-EBI-UniProt-GOA_26.01.2019_00h00	1.4167e-05	7.2409e-05	[Acacb, Acsl5, Elovl1, Elovl5, Snca]
GO:0006633	fatty acid biosynthetic process	GO_BiologicalProcess-EBI-UniProt-GOA_26.01.2019_00h00	1.47279e-05	7.39073e-05	[Acacb, Elovl1, Elovl5, Hacd2, LOC681458, Lpl, Ptgs2, Sphk1]
GO:0010752	regulation of cGMP-mediated signaling	GO_BiologicalProcess-EBI-UniProt-GOA_26.01.2019_00h00	1.51917e-05	7.48733e-05	[Mt2A, Pde10a, Pde2a, Ptk2b]
GO:0007612	learning	GO_BiologicalProcess-EBI-UniProt-GOA_26.01.2019_00h00	1.5532e-05	7.52077e-05	[Arc, Cck, Drd1, Gpr88, Meis2, Ppp1r1b, Ptgs2, Rgs14, Tbr1]
GO:0009266	response to temperature stimulus	GO_BiologicalProcess-EBI-UniProt-GOA_26.01.2019_00h00	1.65338e-05	7.86782e-05	[Ano1, Ano3, Arpp21, Casq1, Cdkn1a, Dio2, Hspa1a, Hspa1b, Lpl, Ptgs2, Srl]
GO:0035383	thioester metabolic process	GO_BiologicalProcess-EBI-UniProt-GOA_26.01.2019_00h00	1.71247e-05	8.01089e-05	[Acacb, Acsl5, Elovl1, Elovl5, Far2, Mcee, Snca]
GO:0006637	acyl-CoA metabolic process	GO_BiologicalProcess-EBI-UniProt-GOA_26.01.2019_00h00	1.71247e-05	8.01089e-05	[Acacb, Acsl5, Elovl1, Elovl5, Far2, Mcee, Snca]
GO:0019722	calcium-mediated signaling	GO_BiologicalProcess-EBI-UniProt-GOA_26.01.2019_00h00	1.72207e-05	7.92152e-05	[Actn3, Akap5, Casq1, Cd24, Drd1, Ptk2b, Sphk1, Srl, Tmem100, Tmem38a]
GO:0050795	regulation of behavior	GO_BiologicalProcess-EBI-UniProt-GOA_26.01.2019_00h00	1.84434e-05	8.3449e-05	[Adora2a, Alb, Cck, Drd1, Mef2c, Mt2A, Srl]
GO:0019751	polyol metabolic process	GO_BiologicalProcess-EBI-UniProt-GOA_26.01.2019_00h00	1.87459e-05	8.34494e-05	[Acer3, Itpka, Mas1, Ptk2b, Snca, Sphk1, Sptlc1, Srl]
GO:0060359	response to ammonium ion	GO_BiologicalProcess-EBI-UniProt-GOA_26.01.2019_00h00	1.95841e-05	8.57968e-05	[Chrm1, Drd1, Fosb, Homer1, Hspa1a, Hspa1b, Ppp1r1b, Ptk2b, Snca, Srl]
GO:0043279	response to alkaloid	GO_BiologicalProcess-EBI-UniProt-GOA_26.01.2019_00h00	2.04314e-05	8.81104e-05	[Adora2a, Drd1, Fosb, Homer1, Hspa1a, Hspa1b, Ppp1r1b, Ptk2b, Snca, Tmem38a]
GO:0019915	lipid storage	GO_BiologicalProcess-EBI-UniProt-GOA_26.01.2019_00h00	2.06834e-05	8.78251e-05	[Abhd5, Acacb, C3, Cidea, Lpl, Plin2]
GO:0006941	striated muscle contraction	GO_BiologicalProcess-EBI-UniProt-GOA_26.01.2019_00h00	2.09472e-05	8.75975e-05	[Actn3, Casq1, Homer1, Myh4, Mylpf, Pgam2, Tmem38a, Tnnc2, Tnnt3]
GO:0010754	negative regulation of cGMP-mediated signaling	GO_BiologicalProcess-EBI-UniProt-GOA_26.01.2019_00h00	2.63228e-05	0.000108434	[Mt2A, Pde10a, Pde2a]
GO:0006641	triglyceride metabolic process	GO_BiologicalProcess-EBI-UniProt-GOA_26.01.2019_00h00	2.82378e-05	0.000114612	[Abhd5, Acsl5, C3, Cd36, Lpl, Pnpla3, Thrsp]
GO:0035337	fatty-acyl-CoA metabolic process	GO_BiologicalProcess-EBI-UniProt-GOA_26.01.2019_00h00	3.02636e-05	0.000121055	[Acsl5, Elovl1, Elovl5, Far2]
GO:0010226	response to lithium ion	GO_BiologicalProcess-EBI-UniProt-GOA_26.01.2019_00h00	3.20351e-05	0.00012631	[Acta1, Cdh1, Fabp4, Ptgs2, Ptk2b]
GO:0014902	myotube differentiation	GO_BiologicalProcess-EBI-UniProt-GOA_26.01.2019_00h00	3.4543e-05	0.00013428	[Acta1, Actn3, Homer1, Klhl41, Mef2c, Neu2, Nov]
GO:0042220	response to cocaine	GO_BiologicalProcess-EBI-UniProt-GOA_26.01.2019_00h00	3.68852e-05	0.000141393	[Drd1, Homer1, Hspa1a, Hspa1b, Ppp1r1b, Ptk2b, Snca]
GO:0090207	regulation of triglyceride metabolic process	GO_BiologicalProcess-EBI-UniProt-GOA_26.01.2019_00h00	4.08018e-05	0.000154264	[Abhd5, Acsl5, C3, Cd36, Thrsp]
GO:0006636	unsaturated fatty acid biosynthetic process	GO_BiologicalProcess-EBI-UniProt-GOA_26.01.2019_00h00	4.08018e-05	0.000154264	[Elovl1, Elovl5, LOC681458, Ptgs2, Sphk1]
GO:0003009	skeletal muscle contraction	GO_BiologicalProcess-EBI-UniProt-GOA_26.01.2019_00h00	4.58277e-05	0.000168646	[Actn3, Casq1, Homer1, Tnnc2, Tnnt3]
GO:0033865	nucleoside bisphosphate metabolic process	GO_BiologicalProcess-EBI-UniProt-GOA_26.01.2019_00h00	5.06406e-05	0.000183905	[Acacb, Acsl5, Elovl1, Elovl5, Far2, Mcee, Snca]
GO:0034032	purine nucleoside bisphosphate metabolic process	GO_BiologicalProcess-EBI-UniProt-GOA_26.01.2019_00h00	5.06406e-05	0.000183905	[Acacb, Acsl5, Elovl1, Elovl5, Far2, Mcee, Snca]
GO:0033875	ribonucleoside bisphosphate metabolic process	GO_BiologicalProcess-EBI-UniProt-GOA_26.01.2019_00h00	5.06406e-05	0.000183905	[Acacb, Acsl5, Elovl1, Elovl5, Far2, Mcee, Snca]
GO:0060291	long-term synaptic potentiation	GO_BiologicalProcess-EBI-UniProt-GOA_26.01.2019_00h00	5.38405e-05	0.000192987	[Adora2a, Arc, Drd1, Plk2, Ptk2b, Rgs14, Snca]
GO:0009108	coenzyme biosynthetic process	GO_BiologicalProcess-EBI-UniProt-GOA_26.01.2019_00h00	5.42551e-05	0.000191979	[Acacb, Acsl5, Actn3, Elovl1, Elovl5, Eno3, Mocos, Pgam2, Snca]
GO:0033866	nucleoside bisphosphate biosynthetic process	GO_BiologicalProcess-EBI-UniProt-GOA_26.01.2019_00h00	5.73056e-05	0.000200207	[Acacb, Acsl5, Elovl1, Elovl5, Snca]
GO:0034033	purine nucleoside bisphosphate biosynthetic process	GO_BiologicalProcess-EBI-UniProt-GOA_26.01.2019_00h00	5.73056e-05	0.000200207	[Acacb, Acsl5, Elovl1, Elovl5, Snca]
GO:0034030	ribonucleoside bisphosphate biosynthetic process	GO_BiologicalProcess-EBI-UniProt-GOA_26.01.2019_00h00	5.73056e-05	0.000200207	[Acacb, Acsl5, Elovl1, Elovl5, Snca]
GO:0060078	regulation of postsynaptic membrane potential	GO_BiologicalProcess-EBI-UniProt-GOA_26.01.2019_00h00	6.10445e-05	0.000210603	[Adora2a, Baiap2, Chrm1, Gabrd, Mef2c, Ptk2b, Slc17a7, Snca]
GO:0045834	positive regulation of lipid metabolic process	GO_BiologicalProcess-EBI-UniProt-GOA_26.01.2019_00h00	6.10445e-05	0.000210603	[Abhd5, Acsl5, Cd36, Cga, Elovl5, Ptgs2, Ptk2b, Srl]
GO:0072376	protein activation cascade	GO_BiologicalProcess-EBI-UniProt-GOA_26.01.2019_00h00	6.25035e-05	0.000212975	[C3, C4b, Cfd, F12, Hspa1a, Hspa1b]
GO:0035249	synaptic transmission, glutamatergic	GO_BiologicalProcess-EBI-UniProt-GOA_26.01.2019_00h00	6.44481e-05	0.000216923	[Adora2a, Drd1, Homer1, Mef2c, Ptgs2, Ptk2b, Slc17a7]
GO:0051188	cofactor biosynthetic process	GO_BiologicalProcess-EBI-UniProt-GOA_26.01.2019_00h00	7.0261e-05	0.000228141	[Acacb, Acsl5, Actn3, Alas1, Elovl1, Elovl5, Eno3, Mocos, Pgam2, Snca]
GO:0090257	regulation of muscle system process	GO_BiologicalProcess-EBI-UniProt-GOA_26.01.2019_00h00	7.53741e-05	0.000239118	[Actn3, Casq1, Mef2c, Mlip, Ptgs2, Sphk1, Srl, Tmem38a, Tnnc2, Tnnt3]
GO:0055003	cardiac myofibril assembly	GO_BiologicalProcess-EBI-UniProt-GOA_26.01.2019_00h00	7.62195e-05	0.000239052	[Mybpc2, Mylpf, Neb, Nrap]
GO:0043154	negative regulation of cysteine-type endopeptidase activity involved in apoptotic process	GO_BiologicalProcess-EBI-UniProt-GOA_26.01.2019_00h00	7.81907e-05	0.000242479	[Adora2a, Arc, Hspa1a, Hspa1b, Ptgs2, Snca]
GO:0097755	positive regulation of blood vessel diameter	GO_BiologicalProcess-EBI-UniProt-GOA_26.01.2019_00h00	7.81907e-05	0.000242479	[Adora2a, Alb, Drd1, Hspa1a, Hspa1b, Mt2A]
GO:0035338	long-chain fatty-acyl-CoA biosynthetic process	GO_BiologicalProcess-EBI-UniProt-GOA_26.01.2019_00h00	8.84237e-05	0.000271166	[Acsl5, Elovl1, Elovl5]
GO:0046512	sphingosine biosynthetic process	GO_BiologicalProcess-EBI-UniProt-GOA_26.01.2019_00h00	8.84237e-05	0.000271166	[Acer3, Sphk1, Sptlc1]
GO:0006639	acylglycerol metabolic process	GO_BiologicalProcess-EBI-UniProt-GOA_26.01.2019_00h00	9.0803e-05	0.000275403	[Abhd5, Acsl5, C3, Cd36, Lpl, Pnpla3, Thrsp]
GO:0072347	response to anesthetic	GO_BiologicalProcess-EBI-UniProt-GOA_26.01.2019_00h00	9.3213e-05	0.000279639	[Drd1, Fosb, Homer1, Hspa1a, Hspa1b, Ppp1r1b, Ptk2b, Snca]
GO:0051966	regulation of synaptic transmission, glutamatergic	GO_BiologicalProcess-EBI-UniProt-GOA_26.01.2019_00h00	0.000111172	0.000329931	[Adora2a, Drd1, Homer1, Mef2c, Ptgs2, Ptk2b]
GO:1905954	positive regulation of lipid localization	GO_BiologicalProcess-EBI-UniProt-GOA_26.01.2019_00h00	0.000111172	0.000329931	[Acacb, Acsl5, C3, Lpl, Pla2r1, Sgpp1]
GO:2000117	negative regulation of cysteine-type endopeptidase activity	GO_BiologicalProcess-EBI-UniProt-GOA_26.01.2019_00h00	0.000111172	0.000329931	[Adora2a, Arc, Hspa1a, Hspa1b, Ptgs2, Snca]
GO:0010522	regulation of calcium ion transport into cytosol	GO_BiologicalProcess-EBI-UniProt-GOA_26.01.2019_00h00	0.000112814	0.000331241	[Akap5, Arc, Casq1, Drd1, Ptk2b, Snca, Tmem38a]
GO:0003018	vascular process in circulatory system	GO_BiologicalProcess-EBI-UniProt-GOA_26.01.2019_00h00	0.000115334	0.000335077	[Adora2a, Alb, Drd1, Hspa1a, Hspa1b, Mt2A, Pde2a, Ptgs2, Srl]
GO:0006670	sphingosine metabolic process	GO_BiologicalProcess-EBI-UniProt-GOA_26.01.2019_00h00	0.000120758	0.000347178	[Acer3, Sphk1, Sptlc1]
GO:1903169	regulation of calcium ion transmembrane transport	GO_BiologicalProcess-EBI-UniProt-GOA_26.01.2019_00h00	0.000138316	0.000393558	[Arc, Casq1, Drd1, Hspa1a, Hspa1b, Ptk2b, Snca, Tmem38a]
GO:0051279	regulation of release of sequestered calcium ion into cytosol	GO_BiologicalProcess-EBI-UniProt-GOA_26.01.2019_00h00	0.000144801	0.000407807	[Arc, Casq1, Drd1, Ptk2b, Snca, Tmem38a]
GO:0050881	musculoskeletal movement	GO_BiologicalProcess-EBI-UniProt-GOA_26.01.2019_00h00	0.000151467	0.000422271	[Actn3, Casq1, Homer1, Tnnc2, Tnnt3]
GO:0050805	negative regulation of synaptic transmission	GO_BiologicalProcess-EBI-UniProt-GOA_26.01.2019_00h00	0.00015435	0.000426007	[Arc, Drd1, Plk2, Ptgs2, Ptk2b, Snca]
GO:0048741	skeletal muscle fiber development	GO_BiologicalProcess-EBI-UniProt-GOA_26.01.2019_00h00	0.000159285	0.000435273	[Acta1, Actn3, Homer1, Klhl41]
GO:0046949	fatty-acyl-CoA biosynthetic process	GO_BiologicalProcess-EBI-UniProt-GOA_26.01.2019_00h00	0.000159918	0.00043272	[Acsl5, Elovl1, Elovl5]
GO:0035296	regulation of tube diameter	GO_BiologicalProcess-EBI-UniProt-GOA_26.01.2019_00h00	0.000163464	0.00043802	[Adora2a, Alb, Drd1, Hspa1a, Hspa1b, Mt2A, Ptgs2, Srl]
GO:0097746	regulation of blood vessel diameter	GO_BiologicalProcess-EBI-UniProt-GOA_26.01.2019_00h00	0.000163464	0.00043802	[Adora2a, Alb, Drd1, Hspa1a, Hspa1b, Mt2A, Ptgs2, Srl]
GO:0034605	cellular response to heat	GO_BiologicalProcess-EBI-UniProt-GOA_26.01.2019_00h00	0.000164391	0.000436269	[Ano1, Arpp21, Cdkn1a, Hspa1a, Hspa1b, Ptgs2]
GO:0050729	positive regulation of inflammatory response	GO_BiologicalProcess-EBI-UniProt-GOA_26.01.2019_00h00	0.000178392	0.000468915	[C3, Cd24, F12, Fabp4, Pde2a, Ptgs2, Snca]
GO:0008542	visual learning	GO_BiologicalProcess-EBI-UniProt-GOA_26.01.2019_00h00	0.000179618	0.000467685	[Cck, Drd1, Meis2, Ppp1r1b, Rgs14]
GO:0051209	release of sequestered calcium ion into cytosol	GO_BiologicalProcess-EBI-UniProt-GOA_26.01.2019_00h00	0.000187264	0.000483036	[Arc, Casq1, Drd1, Ptk2b, Snca, Srl, Tmem38a]
GO:0019935	cyclic-nucleotide-mediated signaling	GO_BiologicalProcess-EBI-UniProt-GOA_26.01.2019_00h00	0.000190569	0.000487009	[Adora2a, Aqp1, Crem, Drd1, Mt2A, Pde10a, Pde2a, Ptk2b, Srl]
GO:0021879	forebrain neuron differentiation	GO_BiologicalProcess-EBI-UniProt-GOA_26.01.2019_00h00	0.000195108	0.000494035	[Bcl11b, Drd1, Foxg1, Inhba, Tbr1]
GO:0007632	visual behavior	GO_BiologicalProcess-EBI-UniProt-GOA_26.01.2019_00h00	0.000195108	0.000494035	[Cck, Drd1, Meis2, Ppp1r1b, Rgs14]
GO:0006956	complement activation	GO_BiologicalProcess-EBI-UniProt-GOA_26.01.2019_00h00	0.000195108	0.000494035	[C3, C4b, Cfd, Hspa1a, Hspa1b]
GO:1901617	organic hydroxy compound biosynthetic process	GO_BiologicalProcess-EBI-UniProt-GOA_26.01.2019_00h00	0.000204069	0.000512029	[Acer3, Actn3, Amacr, Itpka, Mas1, Ptk2b, Snca, Sphk1, Sptlc1]
GO:0045187	regulation of circadian sleep/wake cycle, sleep	GO_BiologicalProcess-EBI-UniProt-GOA_26.01.2019_00h00	0.000206024	0.000512276	[Adora2a, Alb, Drd1, Mt2A]
GO:0051283	negative regulation of sequestering of calcium ion	GO_BiologicalProcess-EBI-UniProt-GOA_26.01.2019_00h00	0.000206079	0.000507837	[Arc, Casq1, Drd1, Ptk2b, Snca, Srl, Tmem38a]
GO:0030497	fatty acid elongation	GO_BiologicalProcess-EBI-UniProt-GOA_26.01.2019_00h00	0.000206485	0.000504334	[Elovl1, Elovl5, Hacd2]
GO:0007616	long-term memory	GO_BiologicalProcess-EBI-UniProt-GOA_26.01.2019_00h00	0.000211596	0.000512284	[Arc, Hspa1a, Hspa1b, Rgs14, Slc17a7]
GO:0051282	regulation of sequestering of calcium ion	GO_BiologicalProcess-EBI-UniProt-GOA_26.01.2019_00h00	0.000216042	0.000518502	[Arc, Casq1, Drd1, Ptk2b, Snca, Srl, Tmem38a]
GO:1904018	positive regulation of vasculature development	GO_BiologicalProcess-EBI-UniProt-GOA_26.01.2019_00h00	0.000225108	0.000535601	[Aqp1, C3, Lrg1, Plk2, Ptgs2, Ptk2b, Sphk1, Tmem100]
GO:0051208	sequestering of calcium ion	GO_BiologicalProcess-EBI-UniProt-GOA_26.01.2019_00h00	0.000226391	0.000534051	[Arc, Casq1, Drd1, Ptk2b, Snca, Srl, Tmem38a]
GO:0014904	myotube cell development	GO_BiologicalProcess-EBI-UniProt-GOA_26.01.2019_00h00	0.000232762	0.000544427	[Acta1, Actn3, Homer1, Klhl41]
GO:1901568	fatty acid derivative metabolic process	GO_BiologicalProcess-EBI-UniProt-GOA_26.01.2019_00h00	0.000237136	0.000549996	[Acsl5, Elovl1, Elovl5, Far2, Ptgr1, Ptgs2, Sphk1]
GO:0060402	calcium ion transport into cytosol	GO_BiologicalProcess-EBI-UniProt-GOA_26.01.2019_00h00	0.000243178	0.00055931	[Akap5, Arc, Casq1, Drd1, Ptk2b, Snca, Srl, Tmem38a]
GO:0015800	acidic amino acid transport	GO_BiologicalProcess-EBI-UniProt-GOA_26.01.2019_00h00	0.000247734	0.000565079	[Adora2a, Cck, Slc17a7, Slc1a3, Snca]
GO:0001676	long-chain fatty acid metabolic process	GO_BiologicalProcess-EBI-UniProt-GOA_26.01.2019_00h00	0.000249998	0.00056557	[Acsl5, Adtrp, Cd36, Pnpla3, Ptgs2, Sphk1]
GO:0008306	associative learning	GO_BiologicalProcess-EBI-UniProt-GOA_26.01.2019_00h00	0.000249998	0.00056557	[Cck, Drd1, Meis2, Ppp1r1b, Rgs14, Tbr1]
GO:0050880	regulation of blood vessel size	GO_BiologicalProcess-EBI-UniProt-GOA_26.01.2019_00h00	0.000252649	0.00056692	[Adora2a, Alb, Drd1, Hspa1a, Hspa1b, Mt2A, Ptgs2, Srl]
GO:1905952	regulation of lipid localization	GO_BiologicalProcess-EBI-UniProt-GOA_26.01.2019_00h00	0.000259859	0.000578395	[Abhd5, Acacb, Acsl5, C3, Lpl, Pla2r1, Sgpp1]
GO:0042761	very long-chain fatty acid biosynthetic process	GO_BiologicalProcess-EBI-UniProt-GOA_26.01.2019_00h00	0.000261018	0.000576327	[Elovl1, Elovl5, Hacd2]
GO:0010883	regulation of lipid storage	GO_BiologicalProcess-EBI-UniProt-GOA_26.01.2019_00h00	0.000261908	0.000573703	[Abhd5, Acacb, C3, Lpl]
GO:0034767	positive regulation of ion transmembrane transport	GO_BiologicalProcess-EBI-UniProt-GOA_26.01.2019_00h00	0.000262421	0.0005703	[Acsl5, Arc, Casq1, Drd1, Hspa1a, Hspa1b, Snca, Tesc]
GO:0035150	regulation of tube size	GO_BiologicalProcess-EBI-UniProt-GOA_26.01.2019_00h00	0.000262421	0.0005703	[Adora2a, Alb, Drd1, Hspa1a, Hspa1b, Mt2A, Ptgs2, Srl]
GO:0014850	response to muscle activity	GO_BiologicalProcess-EBI-UniProt-GOA_26.01.2019_00h00	0.000293586	0.000633045	[Akap5, Myh4, Postn, Srl]
GO:0042749	regulation of circadian sleep/wake cycle	GO_BiologicalProcess-EBI-UniProt-GOA_26.01.2019_00h00	0.000293586	0.000633045	[Adora2a, Alb, Drd1, Mt2A]
GO:0015909	long-chain fatty acid transport	GO_BiologicalProcess-EBI-UniProt-GOA_26.01.2019_00h00	0.000310506	0.000664339	[Acsl5, Cd36, Fabp4, Pla2r1, Plin2]
GO:0045938	positive regulation of circadian sleep/wake cycle, sleep	GO_BiologicalProcess-EBI-UniProt-GOA_26.01.2019_00h00	0.000324062	0.000688009	[Adora2a, Alb, Mt2A]
GO:0001963	synaptic transmission, dopaminergic	GO_BiologicalProcess-EBI-UniProt-GOA_26.01.2019_00h00	0.00032792	0.000690886	[Adora2a, Drd1, Ptgs2, Snca]
GO:0050802	circadian sleep/wake cycle, sleep	GO_BiologicalProcess-EBI-UniProt-GOA_26.01.2019_00h00	0.000365038	0.000763261	[Adora2a, Alb, Drd1, Mt2A]
GO:0021872	forebrain generation of neurons	GO_BiologicalProcess-EBI-UniProt-GOA_26.01.2019_00h00	0.000384647	0.000792258	[Bcl11b, Drd1, Foxg1, Inhba, Tbr1]
GO:0043647	inositol phosphate metabolic process	GO_BiologicalProcess-EBI-UniProt-GOA_26.01.2019_00h00	0.000384647	0.000792258	[Itpka, Mas1, Ptk2b, Snca, Srl]
GO:0046165	alcohol biosynthetic process	GO_BiologicalProcess-EBI-UniProt-GOA_26.01.2019_00h00	0.000384796	0.000786694	[Acer3, Itpka, Mas1, Ptk2b, Snca, Sphk1, Sptlc1]
GO:0046683	response to organophosphorus	GO_BiologicalProcess-EBI-UniProt-GOA_26.01.2019_00h00	0.000391845	0.000795215	[Alas1, Aqp1, Fosb, Pde2a, Ptgs2, Ptk2b, Sdc1, Sphk1]
GO:0044242	cellular lipid catabolic process	GO_BiologicalProcess-EBI-UniProt-GOA_26.01.2019_00h00	0.000420177	0.000846489	[Abhd5, Acacb, Acer3, Acsl5, Adtrp, Lpl, Neu2, Pnpla3]
GO:0033559	unsaturated fatty acid metabolic process	GO_BiologicalProcess-EBI-UniProt-GOA_26.01.2019_00h00	0.00045145	0.0009029	[Elovl1, Elovl5, LOC681458, Ptgr1, Ptgs2, Sphk1]
GO:0097553	calcium ion transmembrane import into cytosol	GO_BiologicalProcess-EBI-UniProt-GOA_26.01.2019_00h00	0.000453875	0.000901219	[Arc, Casq1, Drd1, Ptk2b, Snca, Srl, Tmem38a]
GO:0060079	excitatory postsynaptic potential	GO_BiologicalProcess-EBI-UniProt-GOA_26.01.2019_00h00	0.00047466	0.000935759	[Adora2a, Baiap2, Mef2c, Ptk2b, Slc17a7, Snca]
GO:0043534	blood vessel endothelial cell migration	GO_BiologicalProcess-EBI-UniProt-GOA_26.01.2019_00h00	0.00047466	0.000935759	[Adtrp, Egr3, Mef2c, Plk2, Ptgs2, Ptk2b]
GO:0022410	circadian sleep/wake cycle process	GO_BiologicalProcess-EBI-UniProt-GOA_26.01.2019_00h00	0.000494364	0.000967691	[Adora2a, Alb, Drd1, Mt2A]
GO:0046890	regulation of lipid biosynthetic process	GO_BiologicalProcess-EBI-UniProt-GOA_26.01.2019_00h00	0.000511909	0.000994978	[Acsl5, C3, Cga, Elovl5, Ptgs2, Srl, Thrsp]
GO:0060996	dendritic spine development	GO_BiologicalProcess-EBI-UniProt-GOA_26.01.2019_00h00	0.000523865	0.0010111	[Arc, Baiap2, Camk2a, Itpka, Mef2c, Plk2]
GO:0001659	temperature homeostasis	GO_BiologicalProcess-EBI-UniProt-GOA_26.01.2019_00h00	0.000532754	0.00102111	[Actn3, Cd36, Cidea, Dio2, Drd1, Fabp4, G0s2, Ptgs2]
GO:0060292	long-term synaptic depression	GO_BiologicalProcess-EBI-UniProt-GOA_26.01.2019_00h00	0.000543894	0.00102818	[Arc, Drd1, Plk2, Ptk2b]
GO:0010919	regulation of inositol phosphate biosynthetic process	GO_BiologicalProcess-EBI-UniProt-GOA_26.01.2019_00h00	0.000569456	0.00106918	[Mas1, Ptk2b, Snca]
GO:0032958	inositol phosphate biosynthetic process	GO_BiologicalProcess-EBI-UniProt-GOA_26.01.2019_00h00	0.000596851	0.00111305	[Itpka, Mas1, Ptk2b, Snca]
GO:0042745	circadian sleep/wake cycle	GO_BiologicalProcess-EBI-UniProt-GOA_26.01.2019_00h00	0.000596851	0.00111305	[Adora2a, Alb, Drd1, Mt2A]
GO:0006937	regulation of muscle contraction	GO_BiologicalProcess-EBI-UniProt-GOA_26.01.2019_00h00	0.000598325	0.00110831	[Actn3, Casq1, Ptgs2, Sphk1, Tmem38a, Tnnc2, Tnnt3]
GO:0045017	glycerolipid biosynthetic process	GO_BiologicalProcess-EBI-UniProt-GOA_26.01.2019_00h00	0.000598325	0.00110831	[Abhd5, Acsl5, C3, Lpl, Pnpla3, Srl, Thrsp]
GO:0099565	chemical synaptic transmission, postsynaptic	GO_BiologicalProcess-EBI-UniProt-GOA_26.01.2019_00h00	0.000634122	0.00116678	[Adora2a, Baiap2, Mef2c, Ptk2b, Slc17a7, Snca]
GO:0098754	detoxification	GO_BiologicalProcess-EBI-UniProt-GOA_26.01.2019_00h00	0.000664306	0.00120624	[Akr7a3, Hbb, Mgst1, Mt2A, Pon3, Ptgs2]
GO:0031644	regulation of neurological system process	GO_BiologicalProcess-EBI-UniProt-GOA_26.01.2019_00h00	0.000670441	0.00120942	[Baiap2, Cck, Homer1, Mt2A, Nov, Ptk2b, Tmem100]
GO:0009408	response to heat	GO_BiologicalProcess-EBI-UniProt-GOA_26.01.2019_00h00	0.000670441	0.00120942	[Ano1, Arpp21, Casq1, Cdkn1a, Hspa1a, Hspa1b, Ptgs2]
GO:0021542	dentate gyrus development	GO_BiologicalProcess-EBI-UniProt-GOA_26.01.2019_00h00	0.000671657	0.00120375	[Drd1, Mef2c, Neurod6]
GO:0010884	positive regulation of lipid storage	GO_BiologicalProcess-EBI-UniProt-GOA_26.01.2019_00h00	0.000671657	0.00120375	[Acacb, C3, Lpl]
GO:0010866	regulation of triglyceride biosynthetic process	GO_BiologicalProcess-EBI-UniProt-GOA_26.01.2019_00h00	0.000671657	0.00120375	[Acsl5, C3, Thrsp]
GO:0002209	behavioral defense response	GO_BiologicalProcess-EBI-UniProt-GOA_26.01.2019_00h00	0.000713571	0.00127062	[Cck, Drd1, Gng7, Mef2c]
GO:0001662	behavioral fear response	GO_BiologicalProcess-EBI-UniProt-GOA_26.01.2019_00h00	0.000713571	0.00127062	[Cck, Drd1, Gng7, Mef2c]
GO:0045766	positive regulation of angiogenesis	GO_BiologicalProcess-EBI-UniProt-GOA_26.01.2019_00h00	0.00072223	0.00127779	[Aqp1, C3, Lrg1, Plk2, Ptgs2, Ptk2b, Sphk1]
GO:0032890	regulation of organic acid transport	GO_BiologicalProcess-EBI-UniProt-GOA_26.01.2019_00h00	0.000730715	0.00128457	[Acsl5, Adora2a, Cck, Pla2r1, Snca]
GO:0014075	response to amine	GO_BiologicalProcess-EBI-UniProt-GOA_26.01.2019_00h00	0.000775007	0.00135381	[Adora2a, Drd1, Ppp1r1b, Sphk1, Srl]
GO:0010507	negative regulation of autophagy	GO_BiologicalProcess-EBI-UniProt-GOA_26.01.2019_00h00	0.000775007	0.00135381	[Hspa1a, Hspa1b, Lzts1, Snca, Srl]
GO:1904064	positive regulation of cation transmembrane transport	GO_BiologicalProcess-EBI-UniProt-GOA_26.01.2019_00h00	0.000777139	0.001349	[Arc, Casq1, Drd1, Hspa1a, Hspa1b, Snca, Tesc]
GO:0051968	positive regulation of synaptic transmission, glutamatergic	GO_BiologicalProcess-EBI-UniProt-GOA_26.01.2019_00h00	0.000777596	0.00134135	[Adora2a, Drd1, Ptgs2, Ptk2b]
GO:0071498	cellular response to fluid shear stress	GO_BiologicalProcess-EBI-UniProt-GOA_26.01.2019_00h00	0.000784844	0.00134545	[Mef2c, Ptgs2, Ptk2b]
GO:0034312	diol biosynthetic process	GO_BiologicalProcess-EBI-UniProt-GOA_26.01.2019_00h00	0.000784844	0.00134545	[Acer3, Sphk1, Sptlc1]
GO:0048663	neuron fate commitment	GO_BiologicalProcess-EBI-UniProt-GOA_26.01.2019_00h00	0.000821271	0.0013992	[Bcl11b, Foxg1, Hspa1a, Hspa1b, Tbr1]
GO:0043500	muscle adaptation	GO_BiologicalProcess-EBI-UniProt-GOA_26.01.2019_00h00	0.000907986	0.00153745	[Acta1, Actn3, Casq1, Mef2c, Mlip, Srl]
GO:0014874	response to stimulus involved in regulation of muscle adaptation	GO_BiologicalProcess-EBI-UniProt-GOA_26.01.2019_00h00	0.000909465	0.00153056	[Actn3, Casq1, Srl]
GO:2000427	positive regulation of apoptotic cell clearance	GO_BiologicalProcess-EBI-UniProt-GOA_26.01.2019_00h00	0.000909465	0.00153056	[C3, Hspa1a, Hspa1b]
GO:0032892	positive regulation of organic acid transport	GO_BiologicalProcess-EBI-UniProt-GOA_26.01.2019_00h00	0.00091764	0.00153496	[Acsl5, Adora2a, Cck, Pla2r1]
GO:0042596	fear response	GO_BiologicalProcess-EBI-UniProt-GOA_26.01.2019_00h00	0.00091764	0.00153496	[Cck, Drd1, Gng7, Mef2c]
GO:0045445	myoblast differentiation	GO_BiologicalProcess-EBI-UniProt-GOA_26.01.2019_00h00	0.00097246	0.00161686	[Arc, Klhl41, Mef2c, Neu2, Sdc1]
GO:0019217	regulation of fatty acid metabolic process	GO_BiologicalProcess-EBI-UniProt-GOA_26.01.2019_00h00	0.00097246	0.00161686	[Acacb, Acsl5, Elovl5, Ptgs2, Snca]
GO:0007219	Notch signaling pathway	GO_BiologicalProcess-EBI-UniProt-GOA_26.01.2019_00h00	0.00103065	0.00170334	[Cfd, Llgl2, Nov, Perp, Pgam2, Postn, Tmem100]
GO:2000425	regulation of apoptotic cell clearance	GO_BiologicalProcess-EBI-UniProt-GOA_26.01.2019_00h00	0.00104595	0.00171835	[C3, Hspa1a, Hspa1b]
GO:0097164	ammonium ion metabolic process	GO_BiologicalProcess-EBI-UniProt-GOA_26.01.2019_00h00	0.00110318	0.00180165	[Acer3, Drd1, Kdsr, Snca, Sphk1, Sptlc1, Sptlc3]
GO:0046889	positive regulation of lipid biosynthetic process	GO_BiologicalProcess-EBI-UniProt-GOA_26.01.2019_00h00	0.00114342	0.00185637	[Acsl5, Cga, Elovl5, Ptgs2, Srl]
GO:0002042	cell migration involved in sprouting angiogenesis	GO_BiologicalProcess-EBI-UniProt-GOA_26.01.2019_00h00	0.00115967	0.00187174	[Adtrp, Egr3, Plk2, Ptgs2]
GO:0042403	thyroid hormone metabolic process	GO_BiologicalProcess-EBI-UniProt-GOA_26.01.2019_00h00	0.00119473	0.00191712	[Cga, Crym, Dio2]
GO:0034311	diol metabolic process	GO_BiologicalProcess-EBI-UniProt-GOA_26.01.2019_00h00	0.00119473	0.00191712	[Acer3, Sphk1, Sptlc1]
GO:1904427	positive regulation of calcium ion transmembrane transport	GO_BiologicalProcess-EBI-UniProt-GOA_26.01.2019_00h00	0.00120506	0.00192252	[Casq1, Drd1, Hspa1a, Hspa1b, Snca]
GO:0060998	regulation of dendritic spine development	GO_BiologicalProcess-EBI-UniProt-GOA_26.01.2019_00h00	0.00120506	0.00192252	[Arc, Baiap2, Itpka, Mef2c, Plk2]
GO:1903035	negative regulation of response to wounding	GO_BiologicalProcess-EBI-UniProt-GOA_26.01.2019_00h00	0.00126913	0.0020131	[Adtrp, Cd24, Cers2, F12, Sgpp1]
GO:0050848	regulation of calcium-mediated signaling	GO_BiologicalProcess-EBI-UniProt-GOA_26.01.2019_00h00	0.00126913	0.0020131	[Actn3, Akap5, Cd24, Ptk2b, Tmem100]
GO:0015908	fatty acid transport	GO_BiologicalProcess-EBI-UniProt-GOA_26.01.2019_00h00	0.00133568	0.00210655	[Acsl5, Cd36, Fabp4, Pla2r1, Plin2]
GO:0050994	regulation of lipid catabolic process	GO_BiologicalProcess-EBI-UniProt-GOA_26.01.2019_00h00	0.00134387	0.00210743	[Abhd5, Acacb, Acsl5, Cidea]
GO:0042755	eating behavior	GO_BiologicalProcess-EBI-UniProt-GOA_26.01.2019_00h00	0.00134387	0.00210743	[Adora2a, Cck, Cd36, Drd1]
GO:0042447	hormone catabolic process	GO_BiologicalProcess-EBI-UniProt-GOA_26.01.2019_00h00	0.00135619	0.00211474	[Pon3, Sgpp1, Ugt1a2]
GO:0021756	striatum development	GO_BiologicalProcess-EBI-UniProt-GOA_26.01.2019_00h00	0.00135619	0.00211474	[Bcl11b, Drd1, Inhba]
GO:0009313	oligosaccharide catabolic process	GO_BiologicalProcess-EBI-UniProt-GOA_26.01.2019_00h00	0.00135619	0.00211474	[Hspa1a, Hspa1b, Neu2]
GO:0006835	dicarboxylic acid transport	GO_BiologicalProcess-EBI-UniProt-GOA_26.01.2019_00h00	0.00140477	0.00217818	[Adora2a, Cck, Slc17a7, Slc1a3, Snca]
GO:0071242	cellular response to ammonium ion	GO_BiologicalProcess-EBI-UniProt-GOA_26.01.2019_00h00	0.00140477	0.00217818	[Chrm1, Drd1, Hspa1a, Hspa1b, Srl]
GO:0044272	sulfur compound biosynthetic process	GO_BiologicalProcess-EBI-UniProt-GOA_26.01.2019_00h00	0.00140477	0.00217818	[Acacb, Acsl5, Elovl1, Elovl5, Snca]
GO:0046689	response to mercury ion	GO_BiologicalProcess-EBI-UniProt-GOA_26.01.2019_00h00	0.00153073	0.00234712	[Alb, Aqp1, Pgam2]
GO:0046928	regulation of neurotransmitter secretion	GO_BiologicalProcess-EBI-UniProt-GOA_26.01.2019_00h00	0.00153728	0.00234414	[Adora2a, Camk2a, Drd1, Mef2c, Snca, Sphk1]
GO:0062013	positive regulation of small molecule metabolic process	GO_BiologicalProcess-EBI-UniProt-GOA_26.01.2019_00h00	0.00153728	0.00234414	[Acsl5, Actn3, Elovl5, Mas1, Ptgs2, Snca]
GO:0090208	positive regulation of triglyceride metabolic process	GO_BiologicalProcess-EBI-UniProt-GOA_26.01.2019_00h00	0.00171873	0.00260642	[Abhd5, Acsl5, Cd36]
GO:0019433	triglyceride catabolic process	GO_BiologicalProcess-EBI-UniProt-GOA_26.01.2019_00h00	0.00171873	0.00260642	[Abhd5, Lpl, Pnpla3]
GO:0042753	positive regulation of circadian rhythm	GO_BiologicalProcess-EBI-UniProt-GOA_26.01.2019_00h00	0.00171873	0.00260642	[Adora2a, Alb, Mt2A]
GO:0014048	regulation of glutamate secretion	GO_BiologicalProcess-EBI-UniProt-GOA_26.01.2019_00h00	0.00171873	0.00260642	[Adora2a, Cck, Snca]
GO:0072073	kidney epithelium development	GO_BiologicalProcess-EBI-UniProt-GOA_26.01.2019_00h00	0.00185199	0.00279317	[Aqp1, Cd24, Epcam, Irx1, Mef2c, Sdc1]
GO:0016052	carbohydrate catabolic process	GO_BiologicalProcess-EBI-UniProt-GOA_26.01.2019_00h00	0.00192039	0.00288059	[Actn3, Eno3, Hspa1a, Hspa1b, Neu2, Pgam2]
GO:0043502	regulation of muscle adaptation	GO_BiologicalProcess-EBI-UniProt-GOA_26.01.2019_00h00	0.00205607	0.00303462	[Actn3, Casq1, Mef2c, Mlip, Srl]
GO:0006672	ceramide metabolic process	GO_BiologicalProcess-EBI-UniProt-GOA_26.01.2019_00h00	0.00205607	0.00303462	[Acer3, Cers2, Neu2, Sptlc1, Sptssa]
GO:0010880	regulation of release of sequestered calcium ion into cytosol by sarcoplasmic reticulum	GO_BiologicalProcess-EBI-UniProt-GOA_26.01.2019_00h00	0.00213652	0.00313659	[Arc, Casq1, Tmem38a]
GO:0048512	circadian behavior	GO_BiologicalProcess-EBI-UniProt-GOA_26.01.2019_00h00	0.00214906	0.00313832	[Adora2a, Alb, Drd1, Mt2A]
GO:0007215	glutamate receptor signaling pathway	GO_BiologicalProcess-EBI-UniProt-GOA_26.01.2019_00h00	0.00224846	0.00324909	[Arc, Camk2a, Homer1, Mef2c, Ptk2b]
GO:0099601	regulation of neurotransmitter receptor activity	GO_BiologicalProcess-EBI-UniProt-GOA_26.01.2019_00h00	0.0022862	0.00328642	[Arc, Homer1, Mef2c, Ptk2b]
GO:0021544	subpallium development	GO_BiologicalProcess-EBI-UniProt-GOA_26.01.2019_00h00	0.00236699	0.00338492	[Bcl11b, Drd1, Inhba]
GO:0000038	very long-chain fatty acid metabolic process	GO_BiologicalProcess-EBI-UniProt-GOA_26.01.2019_00h00	0.00236699	0.00338492	[Elovl1, Elovl5, Hacd2]
GO:0021761	limbic system development	GO_BiologicalProcess-EBI-UniProt-GOA_26.01.2019_00h00	0.00245418	0.00347361	[Akap5, Drd1, Mas1, Mef2c, Neurod6, Tbr1]
GO:0014808	release of sequestered calcium ion into cytosol by sarcoplasmic reticulum	GO_BiologicalProcess-EBI-UniProt-GOA_26.01.2019_00h00	0.00287273	0.00402474	[Arc, Casq1, Tmem38a]
GO:0007205	protein kinase C-activating G protein-coupled receptor signaling pathway	GO_BiologicalProcess-EBI-UniProt-GOA_26.01.2019_00h00	0.00287273	0.00402474	[Adora2a, Cck, Srl]
GO:1903793	positive regulation of anion transport	GO_BiologicalProcess-EBI-UniProt-GOA_26.01.2019_00h00	0.00289513	0.00403564	[Acsl5, Adora2a, Cck, Pla2r1]
GO:0018958	phenol-containing compound metabolic process	GO_BiologicalProcess-EBI-UniProt-GOA_26.01.2019_00h00	0.00290435	0.00402814	[Cga, Crym, Dio2, Drd1, Snca]
GO:0002040	sprouting angiogenesis	GO_BiologicalProcess-EBI-UniProt-GOA_26.01.2019_00h00	0.00302578	0.00417558	[Adtrp, Egr3, Plk2, Ptgs2, Ptk2b]
GO:0007274	neuromuscular synaptic transmission	GO_BiologicalProcess-EBI-UniProt-GOA_26.01.2019_00h00	0.0031486	0.00432344	[Cd24, Chrm1, Egr3]
GO:0055094	response to lipoprotein particle	GO_BiologicalProcess-EBI-UniProt-GOA_26.01.2019_00h00	0.0031486	0.00432344	[Adtrp, Cd36, Lpl]
GO:1903514	release of sequestered calcium ion into cytosol by endoplasmic reticulum	GO_BiologicalProcess-EBI-UniProt-GOA_26.01.2019_00h00	0.0031486	0.00432344	[Arc, Casq1, Tmem38a]
GO:0014047	glutamate secretion	GO_BiologicalProcess-EBI-UniProt-GOA_26.01.2019_00h00	0.0031486	0.00432344	[Adora2a, Cck, Snca]
GO:0042310	vasoconstriction	GO_BiologicalProcess-EBI-UniProt-GOA_26.01.2019_00h00	0.00327957	0.004481	[Drd1, Hspa1a, Hspa1b, Ptgs2, Srl]
GO:0048814	regulation of dendrite morphogenesis	GO_BiologicalProcess-EBI-UniProt-GOA_26.01.2019_00h00	0.00341206	0.00463906	[Akap5, Arc, Baiap2, Itpka, Lzts1]
GO:0045744	negative regulation of G protein-coupled receptor signaling pathway	GO_BiologicalProcess-EBI-UniProt-GOA_26.01.2019_00h00	0.0034187	0.0046253	[Hspa1a, Hspa1b, Rgs14, Snca]
GO:0032026	response to magnesium ion	GO_BiologicalProcess-EBI-UniProt-GOA_26.01.2019_00h00	0.00344018	0.00463166	[C3, Snca, Sphk1]
GO:0032414	positive regulation of ion transmembrane transporter activity	GO_BiologicalProcess-EBI-UniProt-GOA_26.01.2019_00h00	0.00354835	0.0047541	[Arc, Casq1, Hspa1a, Hspa1b, Tesc]
GO:0042752	regulation of circadian rhythm	GO_BiologicalProcess-EBI-UniProt-GOA_26.01.2019_00h00	0.00354835	0.0047541	[Adora2a, Alb, Crem, Drd1, Mt2A]
GO:0009409	response to cold	GO_BiologicalProcess-EBI-UniProt-GOA_26.01.2019_00h00	0.00360662	0.00480882	[Dio2, Hspa1a, Hspa1b, Lpl]
GO:0046461	neutral lipid catabolic process	GO_BiologicalProcess-EBI-UniProt-GOA_26.01.2019_00h00	0.00374775	0.00497298	[Abhd5, Lpl, Pnpla3]
GO:0046464	acylglycerol catabolic process	GO_BiologicalProcess-EBI-UniProt-GOA_26.01.2019_00h00	0.00374775	0.00497298	[Abhd5, Lpl, Pnpla3]
GO:0001956	positive regulation of neurotransmitter secretion	GO_BiologicalProcess-EBI-UniProt-GOA_26.01.2019_00h00	0.00374775	0.00497298	[Adora2a, Snca, Sphk1]
GO:0042311	vasodilation	GO_BiologicalProcess-EBI-UniProt-GOA_26.01.2019_00h00	0.00374775	0.00497298	[Adora2a, Alb, Drd1]
GO:0010565	regulation of cellular ketone metabolic process	GO_BiologicalProcess-EBI-UniProt-GOA_26.01.2019_00h00	0.00398068	0.00520696	[Acacb, Acsl5, Elovl5, Ptgs2, Snca]
GO:0071300	cellular response to retinoic acid	GO_BiologicalProcess-EBI-UniProt-GOA_26.01.2019_00h00	0.00400324	0.00521176	[Aqp1, Mef2c, Ptk2b, Tesc]
GO:0070723	response to cholesterol	GO_BiologicalProcess-EBI-UniProt-GOA_26.01.2019_00h00	0.00407158	0.00527585	[Aacs, Acsl5, Inhba]
GO:0002675	positive regulation of acute inflammatory response	GO_BiologicalProcess-EBI-UniProt-GOA_26.01.2019_00h00	0.00407158	0.00527585	[C3, F12, Ptgs2]
GO:0006692	prostanoid metabolic process	GO_BiologicalProcess-EBI-UniProt-GOA_26.01.2019_00h00	0.00407158	0.00527585	[Ptgr1, Ptgs2, Sphk1]
GO:0006693	prostaglandin metabolic process	GO_BiologicalProcess-EBI-UniProt-GOA_26.01.2019_00h00	0.00407158	0.00527585	[Ptgr1, Ptgs2, Sphk1]
GO:0042307	positive regulation of protein import into nucleus	GO_BiologicalProcess-EBI-UniProt-GOA_26.01.2019_00h00	0.00407158	0.00527585	[Akap5, Cdh1, Ptgs2]
GO:0009166	nucleotide catabolic process	GO_BiologicalProcess-EBI-UniProt-GOA_26.01.2019_00h00	0.00413281	0.00533016	[Actn3, Eno3, Pde10a, Pde2a, Pgam2]
GO:0097756	negative regulation of blood vessel diameter	GO_BiologicalProcess-EBI-UniProt-GOA_26.01.2019_00h00	0.00428904	0.00550594	[Drd1, Hspa1a, Hspa1b, Ptgs2, Srl]
GO:0071402	cellular response to lipoprotein particle stimulus	GO_BiologicalProcess-EBI-UniProt-GOA_26.01.2019_00h00	0.00441191	0.00563745	[Adtrp, Cd36, Lpl]
GO:0045923	positive regulation of fatty acid metabolic process	GO_BiologicalProcess-EBI-UniProt-GOA_26.01.2019_00h00	0.00441191	0.00563745	[Acsl5, Elovl5, Ptgs2]
GO:0031646	positive regulation of neurological system process	GO_BiologicalProcess-EBI-UniProt-GOA_26.01.2019_00h00	0.00442837	0.0056324	[Baiap2, Cck, Mt2A, Ptk2b]
GO:0044070	regulation of anion transport	GO_BiologicalProcess-EBI-UniProt-GOA_26.01.2019_00h00	0.00461409	0.00584169	[Acsl5, Adora2a, Cck, Pla2r1, Snca]
GO:0032411	positive regulation of transporter activity	GO_BiologicalProcess-EBI-UniProt-GOA_26.01.2019_00h00	0.00461409	0.00584169	[Arc, Casq1, Hspa1a, Hspa1b, Tesc]
GO:0036314	response to sterol	GO_BiologicalProcess-EBI-UniProt-GOA_26.01.2019_00h00	0.00476899	0.00598292	[Aacs, Acsl5, Inhba]
GO:0048168	regulation of neuronal synaptic plasticity	GO_BiologicalProcess-EBI-UniProt-GOA_26.01.2019_00h00	0.00488293	0.00609814	[Arc, Camk2a, Drd1, Snca]
GO:0010524	positive regulation of calcium ion transport into cytosol	GO_BiologicalProcess-EBI-UniProt-GOA_26.01.2019_00h00	0.00488293	0.00609814	[Akap5, Casq1, Drd1, Snca]
GO:0055007	cardiac muscle cell differentiation	GO_BiologicalProcess-EBI-UniProt-GOA_26.01.2019_00h00	0.00495629	0.00616188	[Mef2c, Mybpc2, Mylpf, Neb, Nrap]
GO:0021766	hippocampus development	GO_BiologicalProcess-EBI-UniProt-GOA_26.01.2019_00h00	0.00513398	0.00635416	[Akap5, Drd1, Mas1, Mef2c, Neurod6]
GO:0032273	positive regulation of protein polymerization	GO_BiologicalProcess-EBI-UniProt-GOA_26.01.2019_00h00	0.00550282	0.00678026	[Baiap2, Hspa1a, Hspa1b, Ptk2b, Wipf3]
GO:1901292	nucleoside phosphate catabolic process	GO_BiologicalProcess-EBI-UniProt-GOA_26.01.2019_00h00	0.00550282	0.00678026	[Actn3, Eno3, Pde10a, Pde2a, Pgam2]
GO:1904591	positive regulation of protein import	GO_BiologicalProcess-EBI-UniProt-GOA_26.01.2019_00h00	0.00553429	0.00678872	[Akap5, Cdh1, Ptgs2]
GO:1903831	signal transduction involved in cellular response to ammonium ion	GO_BiologicalProcess-EBI-UniProt-GOA_26.01.2019_00h00	0.00553429	0.00678872	[Chrm1, Hspa1a, Hspa1b]
GO:1905144	response to acetylcholine	GO_BiologicalProcess-EBI-UniProt-GOA_26.01.2019_00h00	0.00553429	0.00678872	[Chrm1, Hspa1a, Hspa1b]
GO:0095500	acetylcholine receptor signaling pathway	GO_BiologicalProcess-EBI-UniProt-GOA_26.01.2019_00h00	0.00553429	0.00678872	[Chrm1, Hspa1a, Hspa1b]
GO:1905145	cellular response to acetylcholine	GO_BiologicalProcess-EBI-UniProt-GOA_26.01.2019_00h00	0.00553429	0.00678872	[Chrm1, Hspa1a, Hspa1b]
GO:0090316	positive regulation of intracellular protein transport	GO_BiologicalProcess-EBI-UniProt-GOA_26.01.2019_00h00	0.00589	0.0071931	[Akap5, Cdh1, Chrm1, Ptgs2, Tmem30b]
GO:0050766	positive regulation of phagocytosis	GO_BiologicalProcess-EBI-UniProt-GOA_26.01.2019_00h00	0.00615391	0.00744947	[C3, Cd36, Hspa1a, Hspa1b]
GO:0034405	response to fluid shear stress	GO_BiologicalProcess-EBI-UniProt-GOA_26.01.2019_00h00	0.00636917	0.00767638	[Mef2c, Ptgs2, Ptk2b]
GO:0006958	complement activation, classical pathway	GO_BiologicalProcess-EBI-UniProt-GOA_26.01.2019_00h00	0.00636917	0.00767638	[C3, Hspa1a, Hspa1b]
GO:0043462	regulation of ATPase activity	GO_BiologicalProcess-EBI-UniProt-GOA_26.01.2019_00h00	0.00671837	0.00806205	[Hspa1a, Hspa1b, Tnnt3, Tpm2]
GO:0014888	striated muscle adaptation	GO_BiologicalProcess-EBI-UniProt-GOA_26.01.2019_00h00	0.00681319	0.00814044	[Acta1, Actn3, Mef2c]
GO:0051084	'de novo' posttranslational protein folding	GO_BiologicalProcess-EBI-UniProt-GOA_26.01.2019_00h00	0.00681319	0.00814044	[Hspa1a, Hspa1b, Ugt1a2]
GO:1901021	positive regulation of calcium ion transmembrane transporter activity	GO_BiologicalProcess-EBI-UniProt-GOA_26.01.2019_00h00	0.00681319	0.00814044	[Casq1, Hspa1a, Hspa1b]
GO:1902476	chloride transmembrane transport	GO_BiologicalProcess-EBI-UniProt-GOA_26.01.2019_00h00	0.00701304	0.00834309	[Ano1, Gabrd, Slc17a7, Slc1a3]
GO:0097061	dendritic spine organization	GO_BiologicalProcess-EBI-UniProt-GOA_26.01.2019_00h00	0.00701304	0.00834309	[Arc, Baiap2, Homer1, Itpka]
GO:2000060	positive regulation of ubiquitin-dependent protein catabolic process	GO_BiologicalProcess-EBI-UniProt-GOA_26.01.2019_00h00	0.00701304	0.00834309	[Hspa1a, Hspa1b, Plk2, Ptk2b]
GO:0006882	cellular zinc ion homeostasis	GO_BiologicalProcess-EBI-UniProt-GOA_26.01.2019_00h00	0.00727518	0.00861781	[Mt2A, Slc30a3, Slc39a4]
GO:0050873	brown fat cell differentiation	GO_BiologicalProcess-EBI-UniProt-GOA_26.01.2019_00h00	0.00727518	0.00861781	[Fabp4, Lrg1, Ptgs2]
GO:0006458	'de novo' protein folding	GO_BiologicalProcess-EBI-UniProt-GOA_26.01.2019_00h00	0.00727518	0.00861781	[Hspa1a, Hspa1b, Ugt1a2]
GO:0016242	negative regulation of macroautophagy	GO_BiologicalProcess-EBI-UniProt-GOA_26.01.2019_00h00	0.00727518	0.00861781	[Hspa1a, Hspa1b, Lzts1]
GO:0035418	protein localization to synapse	GO_BiologicalProcess-EBI-UniProt-GOA_26.01.2019_00h00	0.00762772	0.00899679	[Baiap2, Camk2a, Grasp, Homer1]
GO:0071280	cellular response to copper ion	GO_BiologicalProcess-EBI-UniProt-GOA_26.01.2019_00h00	0.0077553	0.00910835	[Aqp1, Mt2A, Snca]
GO:0019228	neuronal action potential	GO_BiologicalProcess-EBI-UniProt-GOA_26.01.2019_00h00	0.0077553	0.00910835	[Drd1, Gpr88, Mt2A]
GO:0055069	zinc ion homeostasis	GO_BiologicalProcess-EBI-UniProt-GOA_26.01.2019_00h00	0.0082537	0.00965264	[Mt2A, Slc30a3, Slc39a4]
GO:0098664	G protein-coupled serotonin receptor signaling pathway	GO_BiologicalProcess-EBI-UniProt-GOA_26.01.2019_00h00	0.0082537	0.00965264	[Chrm1, Drd1, Srl]
GO:1990776	response to angiotensin	GO_BiologicalProcess-EBI-UniProt-GOA_26.01.2019_00h00	0.0082537	0.00965264	[Camk2a, Mas1, Ptgs2]
GO:0043620	regulation of DNA-templated transcription in response to stress	GO_BiologicalProcess-EBI-UniProt-GOA_26.01.2019_00h00	0.0082537	0.00965264	[Hspa1a, Hspa1b, Rgs14]
GO:0055013	cardiac muscle cell development	GO_BiologicalProcess-EBI-UniProt-GOA_26.01.2019_00h00	0.00827685	0.00963886	[Mybpc2, Mylpf, Neb, Nrap]
GO:0033555	multicellular organismal response to stress	GO_BiologicalProcess-EBI-UniProt-GOA_26.01.2019_00h00	0.00827685	0.00963886	[Cck, Drd1, Gng7, Mef2c]
GO:0019229	regulation of vasoconstriction	GO_BiologicalProcess-EBI-UniProt-GOA_26.01.2019_00h00	0.00827685	0.00963886	[Drd1, Hspa1a, Hspa1b, Ptgs2]
GO:0106027	neuron projection organization	GO_BiologicalProcess-EBI-UniProt-GOA_26.01.2019_00h00	0.00861457	0.00999001	[Arc, Baiap2, Homer1, Itpka]
GO:0043267	negative regulation of potassium ion transport	GO_BiologicalProcess-EBI-UniProt-GOA_26.01.2019_00h00	0.00877055	0.0101283	[Akap5, Mt2A, Ptk2b]
GO:0048641	regulation of skeletal muscle tissue development	GO_BiologicalProcess-EBI-UniProt-GOA_26.01.2019_00h00	0.00930598	0.0106575	[Actn3, Klhl41, Mef2c]
GO:0007210	serotonin receptor signaling pathway	GO_BiologicalProcess-EBI-UniProt-GOA_26.01.2019_00h00	0.00930598	0.0106575	[Chrm1, Drd1, Srl]
GO:1902930	regulation of alcohol biosynthetic process	GO_BiologicalProcess-EBI-UniProt-GOA_26.01.2019_00h00	0.00930598	0.0106575	[Mas1, Ptk2b, Snca]
GO:0055006	cardiac cell development	GO_BiologicalProcess-EBI-UniProt-GOA_26.01.2019_00h00	0.00968145	0.0110417	[Mybpc2, Mylpf, Neb, Nrap]
GO:0061001	regulation of dendritic spine morphogenesis	GO_BiologicalProcess-EBI-UniProt-GOA_26.01.2019_00h00	0.00986011	0.0111991	[Arc, Baiap2, Itpka]
GO:0006942	regulation of striated muscle contraction	GO_BiologicalProcess-EBI-UniProt-GOA_26.01.2019_00h00	0.0100553	0.011374	[Actn3, Casq1, Tmem38a, Tnnt3]
GO:0051281	positive regulation of release of sequestered calcium ion into cytosol	GO_BiologicalProcess-EBI-UniProt-GOA_26.01.2019_00h00	0.0104331	0.0117532	[Casq1, Drd1, Snca]
GO:0002455	humoral immune response mediated by circulating immunoglobulin	GO_BiologicalProcess-EBI-UniProt-GOA_26.01.2019_00h00	0.0104331	0.0117532	[C3, Hspa1a, Hspa1b]
GO:0008637	apoptotic mitochondrial changes	GO_BiologicalProcess-EBI-UniProt-GOA_26.01.2019_00h00	0.0104383	0.0117113	[Arc, Camk2a, Cck, Cd24]
GO:0072080	nephron tubule development	GO_BiologicalProcess-EBI-UniProt-GOA_26.01.2019_00h00	0.0104383	0.0117113	[Aqp1, Cd24, Irx1, Mef2c]
GO:0009311	oligosaccharide metabolic process	GO_BiologicalProcess-EBI-UniProt-GOA_26.01.2019_00h00	0.011025	0.0123194	[Hspa1a, Hspa1b, Neu2]
GO:0090307	mitotic spindle assembly	GO_BiologicalProcess-EBI-UniProt-GOA_26.01.2019_00h00	0.011025	0.0123194	[Hspa1a, Hspa1b, Klhl41]
GO:0031113	regulation of microtubule polymerization	GO_BiologicalProcess-EBI-UniProt-GOA_26.01.2019_00h00	0.011025	0.0123194	[Hspa1a, Hspa1b, Snca]
GO:0043277	apoptotic cell clearance	GO_BiologicalProcess-EBI-UniProt-GOA_26.01.2019_00h00	0.011025	0.0123194	[C3, Hspa1a, Hspa1b]
GO:0099072	regulation of postsynaptic membrane neurotransmitter receptor levels	GO_BiologicalProcess-EBI-UniProt-GOA_26.01.2019_00h00	0.0112325	0.0125007	[Akap5, Arc, Camk2a, Grasp]
GO:0097035	regulation of membrane lipid distribution	GO_BiologicalProcess-EBI-UniProt-GOA_26.01.2019_00h00	0.011636	0.0128977	[Ano3, Atp11a, Tmem30b]
GO:0051955	regulation of amino acid transport	GO_BiologicalProcess-EBI-UniProt-GOA_26.01.2019_00h00	0.011636	0.0128977	[Adora2a, Cck, Snca]
GO:0061326	renal tubule development	GO_BiologicalProcess-EBI-UniProt-GOA_26.01.2019_00h00	0.0116438	0.0128547	[Aqp1, Cd24, Irx1, Mef2c]
GO:0090398	cellular senescence	GO_BiologicalProcess-EBI-UniProt-GOA_26.01.2019_00h00	0.0122661	0.0134878	[Cdkn1a, Pla2r1, Plk2]
GO:0002437	inflammatory response to antigenic stimulus	GO_BiologicalProcess-EBI-UniProt-GOA_26.01.2019_00h00	0.0122661	0.0134878	[C3, Cd24, Rasgrp1]
GO:0046503	glycerolipid catabolic process	GO_BiologicalProcess-EBI-UniProt-GOA_26.01.2019_00h00	0.0122661	0.0134878	[Abhd5, Lpl, Pnpla3]
GO:0051590	positive regulation of neurotransmitter transport	GO_BiologicalProcess-EBI-UniProt-GOA_26.01.2019_00h00	0.0122661	0.0134878	[Adora2a, Snca, Sphk1]
GO:0007052	mitotic spindle organization	GO_BiologicalProcess-EBI-UniProt-GOA_26.01.2019_00h00	0.0124951	0.0136851	[Hspa1a, Hspa1b, Klhl41, Plk2]
GO:2001238	positive regulation of extrinsic apoptotic signaling pathway	GO_BiologicalProcess-EBI-UniProt-GOA_26.01.2019_00h00	0.0129155	0.0140896	[G0s2, Inhba, Tnfrsf12a]
GO:1900449	regulation of glutamate receptor signaling pathway	GO_BiologicalProcess-EBI-UniProt-GOA_26.01.2019_00h00	0.0129155	0.0140896	[Arc, Mef2c, Ptk2b]
GO:0001975	response to amphetamine	GO_BiologicalProcess-EBI-UniProt-GOA_26.01.2019_00h00	0.0129155	0.0140896	[Adora2a, Drd1, Ppp1r1b]
GO:0045661	regulation of myoblast differentiation	GO_BiologicalProcess-EBI-UniProt-GOA_26.01.2019_00h00	0.0129155	0.0140896	[Klhl41, Mef2c, Neu2]
GO:0045933	positive regulation of muscle contraction	GO_BiologicalProcess-EBI-UniProt-GOA_26.01.2019_00h00	0.0129155	0.0140896	[Actn3, Ptgs2, Sphk1]
GO:0050775	positive regulation of dendrite morphogenesis	GO_BiologicalProcess-EBI-UniProt-GOA_26.01.2019_00h00	0.0129155	0.0140896	[Akap5, Baiap2, Itpka]
GO:2000379	positive regulation of reactive oxygen species metabolic process	GO_BiologicalProcess-EBI-UniProt-GOA_26.01.2019_00h00	0.0129353	0.0140557	[Cdkn1a, Ptgs2, Ptk2b, Snca]
GO:0051353	positive regulation of oxidoreductase activity	GO_BiologicalProcess-EBI-UniProt-GOA_26.01.2019_00h00	0.0135842	0.0147029	[Ptk2b, Snca, Srl]
GO:0010830	regulation of myotube differentiation	GO_BiologicalProcess-EBI-UniProt-GOA_26.01.2019_00h00	0.0135842	0.0147029	[Actn3, Neu2, Nov]
GO:0030282	bone mineralization	GO_BiologicalProcess-EBI-UniProt-GOA_26.01.2019_00h00	0.0138451	0.0149267	[Actn3, Mef2c, Ptgs2, Ptk2b]
GO:0003300	cardiac muscle hypertrophy	GO_BiologicalProcess-EBI-UniProt-GOA_26.01.2019_00h00	0.0138451	0.0149267	[Mef2c, Mlip, Mylpf, Srl]
GO:0032768	regulation of monooxygenase activity	GO_BiologicalProcess-EBI-UniProt-GOA_26.01.2019_00h00	0.0142723	0.0153274	[Ptk2b, Snca, Srl]
GO:0042306	regulation of protein import into nucleus	GO_BiologicalProcess-EBI-UniProt-GOA_26.01.2019_00h00	0.0142723	0.0153274	[Akap5, Cdh1, Ptgs2]
GO:1900271	regulation of long-term synaptic potentiation	GO_BiologicalProcess-EBI-UniProt-GOA_26.01.2019_00h00	0.0142723	0.0153274	[Adora2a, Arc, Drd1]
GO:0017001	antibiotic catabolic process	GO_BiologicalProcess-EBI-UniProt-GOA_26.01.2019_00h00	0.0149799	0.016025	[Hbb, Snca, Ugt1a2]
GO:0033627	cell adhesion mediated by integrin	GO_BiologicalProcess-EBI-UniProt-GOA_26.01.2019_00h00	0.015707	0.0167379	[Cd24, Nov, Tesc]
GO:0033209	tumor necrosis factor-mediated signaling pathway	GO_BiologicalProcess-EBI-UniProt-GOA_26.01.2019_00h00	0.0164536	0.0174662	[Krt8, Ptk2b, Sphk1]
GO:0033280	response to vitamin D	GO_BiologicalProcess-EBI-UniProt-GOA_26.01.2019_00h00	0.0164536	0.0174662	[Crym, Ptgs2, Sgpp1]
GO:0051930	regulation of sensory perception of pain	GO_BiologicalProcess-EBI-UniProt-GOA_26.01.2019_00h00	0.0164536	0.0174662	[Cck, Nov, Tmem100]
GO:0046824	positive regulation of nucleocytoplasmic transport	GO_BiologicalProcess-EBI-UniProt-GOA_26.01.2019_00h00	0.0164536	0.0174662	[Akap5, Cdh1, Ptgs2]
GO:0010676	positive regulation of cellular carbohydrate metabolic process	GO_BiologicalProcess-EBI-UniProt-GOA_26.01.2019_00h00	0.0164536	0.0174662	[Actn3, Mas1, Snca]
GO:0051931	regulation of sensory perception	GO_BiologicalProcess-EBI-UniProt-GOA_26.01.2019_00h00	0.01722	0.0182096	[Cck, Nov, Tmem100]
GO:1904589	regulation of protein import	GO_BiologicalProcess-EBI-UniProt-GOA_26.01.2019_00h00	0.01722	0.0182096	[Akap5, Cdh1, Ptgs2]
GO:2000273	positive regulation of signaling receptor activity	GO_BiologicalProcess-EBI-UniProt-GOA_26.01.2019_00h00	0.01722	0.0182096	[Arc, Hspa1a, Hspa1b]
GO:0002673	regulation of acute inflammatory response	GO_BiologicalProcess-EBI-UniProt-GOA_26.01.2019_00h00	0.0180059	0.0189681	[C3, F12, Ptgs2]
GO:0060986	endocrine hormone secretion	GO_BiologicalProcess-EBI-UniProt-GOA_26.01.2019_00h00	0.0188116	0.0197415	[Aqp1, Cga, Inhba]
GO:0031638	zymogen activation	GO_BiologicalProcess-EBI-UniProt-GOA_26.01.2019_00h00	0.0196371	0.0205297	[F12, Perp, Prss12]
GO:0033077	T cell differentiation in thymus	GO_BiologicalProcess-EBI-UniProt-GOA_26.01.2019_00h00	0.0204822	0.0213324	[Bcl11b, Egr3, Rasgrp1]
GO:0032835	glomerulus development	GO_BiologicalProcess-EBI-UniProt-GOA_26.01.2019_00h00	0.0204822	0.0213324	[Aqp1, Cd24, Mef2c]
GO:0043278	response to morphine	GO_BiologicalProcess-EBI-UniProt-GOA_26.01.2019_00h00	0.0204822	0.0213324	[Drd1, Fosb, Ppp1r1b]
GO:1900182	positive regulation of protein localization to nucleus	GO_BiologicalProcess-EBI-UniProt-GOA_26.01.2019_00h00	0.0204822	0.0213324	[Akap5, Cdh1, Ptgs2]
GO:0060997	dendritic spine morphogenesis	GO_BiologicalProcess-EBI-UniProt-GOA_26.01.2019_00h00	0.0204822	0.0213324	[Arc, Baiap2, Itpka]
GO:0140238	presynaptic endocytosis	GO_BiologicalProcess-EBI-UniProt-GOA_26.01.2019_00h00	0.0213472	0.0221497	[Cd24, Slc17a7, Snca]
GO:0048488	synaptic vesicle endocytosis	GO_BiologicalProcess-EBI-UniProt-GOA_26.01.2019_00h00	0.0213472	0.0221497	[Cd24, Slc17a7, Snca]
GO:0002931	response to ischemia	GO_BiologicalProcess-EBI-UniProt-GOA_26.01.2019_00h00	0.0213472	0.0221497	[Camk2a, Hspa1a, Hspa1b]
GO:0072091	regulation of stem cell proliferation	GO_BiologicalProcess-EBI-UniProt-GOA_26.01.2019_00h00	0.0222319	0.0229813	[Cd24, Epcam, Foxg1]
GO:0032370	positive regulation of lipid transport	GO_BiologicalProcess-EBI-UniProt-GOA_26.01.2019_00h00	0.0222319	0.0229813	[Acsl5, Pla2r1, Sgpp1]
GO:0071312	cellular response to alkaloid	GO_BiologicalProcess-EBI-UniProt-GOA_26.01.2019_00h00	0.0222319	0.0229813	[Hspa1a, Hspa1b, Tmem38a]
GO:0051187	cofactor catabolic process	GO_BiologicalProcess-EBI-UniProt-GOA_26.01.2019_00h00	0.0231364	0.023827	[Hbb, Snca, Ugt1a2]
GO:0006096	glycolytic process	GO_BiologicalProcess-EBI-UniProt-GOA_26.01.2019_00h00	0.0231364	0.023827	[Actn3, Eno3, Pgam2]
GO:0014072	response to isoquinoline alkaloid	GO_BiologicalProcess-EBI-UniProt-GOA_26.01.2019_00h00	0.0231364	0.023827	[Drd1, Fosb, Ppp1r1b]
GO:0060191	regulation of lipase activity	GO_BiologicalProcess-EBI-UniProt-GOA_26.01.2019_00h00	0.0240606	0.0246868	[Abhd5, Anxa8, Snca]
GO:0030500	regulation of bone mineralization	GO_BiologicalProcess-EBI-UniProt-GOA_26.01.2019_00h00	0.0240606	0.0246868	[Actn3, Mef2c, Ptk2b]
GO:0006757	ATP generation from ADP	GO_BiologicalProcess-EBI-UniProt-GOA_26.01.2019_00h00	0.0240606	0.0246868	[Actn3, Eno3, Pgam2]
GO:0034698	response to gonadotropin	GO_BiologicalProcess-EBI-UniProt-GOA_26.01.2019_00h00	0.0250047	0.0255603	[Alas1, Inhba, Mas1]
GO:0046513	ceramide biosynthetic process	GO_BiologicalProcess-EBI-UniProt-GOA_26.01.2019_00h00	0.0250047	0.0255603	[Cers2, Sptlc1, Sptssa]
GO:0051155	positive regulation of striated muscle cell differentiation	GO_BiologicalProcess-EBI-UniProt-GOA_26.01.2019_00h00	0.0259685	0.0264476	[Actn3, Mef2c, Neu2]
GO:0032642	regulation of chemokine production	GO_BiologicalProcess-EBI-UniProt-GOA_26.01.2019_00h00	0.026952	0.0273483	[Cd24, Lpl, Postn]
GO:0042866	pyruvate biosynthetic process	GO_BiologicalProcess-EBI-UniProt-GOA_26.01.2019_00h00	0.026952	0.0273483	[Actn3, Eno3, Pgam2]
GO:0045913	positive regulation of carbohydrate metabolic process	GO_BiologicalProcess-EBI-UniProt-GOA_26.01.2019_00h00	0.026952	0.0273483	[Actn3, Mas1, Snca]
GO:0048146	positive regulation of fibroblast proliferation	GO_BiologicalProcess-EBI-UniProt-GOA_26.01.2019_00h00	0.0279552	0.0282624	[Aqp1, Cdkn1a, Sphk1]
GO:0070613	regulation of protein processing	GO_BiologicalProcess-EBI-UniProt-GOA_26.01.2019_00h00	0.0279552	0.0282624	[Arc, C3, F12]
GO:1903317	regulation of protein maturation	GO_BiologicalProcess-EBI-UniProt-GOA_26.01.2019_00h00	0.0289781	0.0291896	[Arc, C3, F12]
GO:2000106	regulation of leukocyte apoptotic process	GO_BiologicalProcess-EBI-UniProt-GOA_26.01.2019_00h00	0.0289781	0.0291896	[Cd24, Mef2c, St6gal1]
GO:0046688	response to copper ion	GO_BiologicalProcess-EBI-UniProt-GOA_26.01.2019_00h00	0.0289781	0.0291896	[Aqp1, Mt2A, Snca]
GO:0032436	positive regulation of proteasomal ubiquitin-dependent protein catabolic process	GO_BiologicalProcess-EBI-UniProt-GOA_26.01.2019_00h00	0.0289781	0.0291896	[Hspa1a, Hspa1b, Plk2]
GO:0036465	synaptic vesicle recycling	GO_BiologicalProcess-EBI-UniProt-GOA_26.01.2019_00h00	0.0300207	0.0301298	[Cd24, Slc17a7, Snca]
GO:0008593	regulation of Notch signaling pathway	GO_BiologicalProcess-EBI-UniProt-GOA_26.01.2019_00h00	0.0321645	0.0321645	[Llgl2, Nov, Postn]
GO:0032602	chemokine production	GO_BiologicalProcess-EBI-UniProt-GOA_26.01.2019_00h00	0.0321645	0.0321645	[Cd24, Lpl, Postn]
GO:0046031	ADP metabolic process	GO_BiologicalProcess-EBI-UniProt-GOA_26.01.2019_00h00	0.0321645	0.0321645	[Actn3, Eno3, Pgam2]
GO:0030017	sarcomere	GO_CellularComponent-EBI-UniProt-GOA_26.01.2019_00h00	1.56833e-10	1.44286e-08	[Acta1, Actn3, Casq1, Des, Homer1, Klhl41, Krt8, Mef2c, Mybpc2, Myh4, Mylpf, Neb, Nrap, Tnnc2, Tnnt3]
GO:0044449	contractile fiber part	GO_CellularComponent-EBI-UniProt-GOA_26.01.2019_00h00	4.12037e-10	2.27445e-08	[Acta1, Actn3, Casq1, Des, Homer1, Klhl41, Krt8, Mef2c, Mybpc2, Myh4, Mylpf, Neb, Nrap, Tnnc2, Tnnt3]
GO:0030016	myofibril	GO_CellularComponent-EBI-UniProt-GOA_26.01.2019_00h00	9.432e-10	4.33872e-08	[Acta1, Actn3, Casq1, Des, Homer1, Klhl41, Krt8, Mef2c, Mybpc2, Myh4, Mylpf, Neb, Nrap, Tnnc2, Tnnt3]
GO:0043292	contractile fiber	GO_CellularComponent-EBI-UniProt-GOA_26.01.2019_00h00	1.80474e-09	6.22635e-08	[Acta1, Actn3, Casq1, Des, Homer1, Klhl41, Krt8, Mef2c, Mybpc2, Myh4, Mylpf, Neb, Nrap, Tnnc2, Tnnt3]
GO:0043197	dendritic spine	GO_CellularComponent-EBI-UniProt-GOA_26.01.2019_00h00	8.84271e-08	1.10936e-06	[Akap5, Arc, Baiap2, Camk2a, Ddn, Drd1, Homer1, Itpka, Lzts1, Ppp1r1b, Ptk2b, Rgs14, Slc1a3]
GO:0044309	neuron spine	GO_CellularComponent-EBI-UniProt-GOA_26.01.2019_00h00	1.04195e-07	1.25034e-06	[Akap5, Arc, Baiap2, Camk2a, Ddn, Drd1, Homer1, Itpka, Lzts1, Ppp1r1b, Ptk2b, Rgs14, Slc1a3]
GO:0005811	lipid droplet	GO_CellularComponent-EBI-UniProt-GOA_26.01.2019_00h00	3.37135e-06	2.21546e-05	[Abhd5, Cidea, Fabp4, Ldah, Plin2, Plin4, Pnpla3]
GO:0030018	Z disc	GO_CellularComponent-EBI-UniProt-GOA_26.01.2019_00h00	1.00711e-05	5.79091e-05	[Actn3, Casq1, Des, Homer1, Krt8, Mybpc2, Neb, Nrap]
GO:0031674	I band	GO_CellularComponent-EBI-UniProt-GOA_26.01.2019_00h00	1.87459e-05	8.34494e-05	[Actn3, Casq1, Des, Homer1, Krt8, Mybpc2, Neb, Nrap]
GO:1905961	protein-cysteine S-palmitoyltransferase complex	GO_CellularComponent-EBI-UniProt-GOA_26.01.2019_00h00	4.18304e-05	0.000156016	[Sptlc1, Sptlc3, Sptssa]
GO:0031211	endoplasmic reticulum palmitoyltransferase complex	GO_CellularComponent-EBI-UniProt-GOA_26.01.2019_00h00	4.18304e-05	0.000156016	[Sptlc1, Sptlc3, Sptssa]
GO:0017059	serine C-palmitoyltransferase complex	GO_CellularComponent-EBI-UniProt-GOA_26.01.2019_00h00	4.18304e-05	0.000156016	[Sptlc1, Sptlc3, Sptssa]
GO:0005865	striated muscle thin filament	GO_CellularComponent-EBI-UniProt-GOA_26.01.2019_00h00	6.44873e-05	0.00021444	[Acta1, Mybpc2, Tnnc2, Tnnt3]
GO:0036379	myofilament	GO_CellularComponent-EBI-UniProt-GOA_26.01.2019_00h00	7.62195e-05	0.000239052	[Acta1, Mybpc2, Tnnc2, Tnnt3]
GO:0002178	palmitoyltransferase complex	GO_CellularComponent-EBI-UniProt-GOA_26.01.2019_00h00	0.000120758	0.000347178	[Sptlc1, Sptlc3, Sptssa]
GO:0043198	dendritic shaft	GO_CellularComponent-EBI-UniProt-GOA_26.01.2019_00h00	0.000384647	0.000792258	[Akap5, Baiap2, Drd1, Homer1, Lzts1]
GO:0005901	caveola	GO_CellularComponent-EBI-UniProt-GOA_26.01.2019_00h00	0.00047466	0.000935759	[Adtrp, Aqp1, Cd36, Cdh1, Drd1, Ptgs2]
GO:0016528	sarcoplasm	GO_CellularComponent-EBI-UniProt-GOA_26.01.2019_00h00	0.00053698	0.00102211	[Arc, Casq1, Klhl41, Mef2c, Tmem38a]
GO:0031672	A band	GO_CellularComponent-EBI-UniProt-GOA_26.01.2019_00h00	0.000713571	0.00127062	[Klhl41, Mybpc2, Myh4, Mylpf]
GO:0044853	plasma membrane raft	GO_CellularComponent-EBI-UniProt-GOA_26.01.2019_00h00	0.00142351	0.00219492	[Adtrp, Aqp1, Cd36, Cdh1, Drd1, Ptgs2]
GO:0033017	sarcoplasmic reticulum membrane	GO_CellularComponent-EBI-UniProt-GOA_26.01.2019_00h00	0.00192054	0.00286524	[Casq1, Klhl41, Tmem38a]
GO:0099524	postsynaptic cytosol	GO_CellularComponent-EBI-UniProt-GOA_26.01.2019_00h00	0.00213652	0.00313659	[Baiap2, Camk2a, Homer1]
GO:0030672	synaptic vesicle membrane	GO_CellularComponent-EBI-UniProt-GOA_26.01.2019_00h00	0.00221329	0.0032151	[Lamp5, Otof, Slc17a7, Slc30a3, Snca, Wfs1]
GO:0099501	exocytic vesicle membrane	GO_CellularComponent-EBI-UniProt-GOA_26.01.2019_00h00	0.00221329	0.0032151	[Lamp5, Otof, Slc17a7, Slc30a3, Snca, Wfs1]
GO:0016529	sarcoplasmic reticulum	GO_CellularComponent-EBI-UniProt-GOA_26.01.2019_00h00	0.00242925	0.00345605	[Arc, Casq1, Klhl41, Tmem38a]
GO:0032589	neuron projection membrane	GO_CellularComponent-EBI-UniProt-GOA_26.01.2019_00h00	0.00380142	0.00502006	[Adora2a, Akap5, Ddn, Lamp5]
GO:0099522	region of cytosol	GO_CellularComponent-EBI-UniProt-GOA_26.01.2019_00h00	0.00594293	0.00722576	[Baiap2, Camk2a, Homer1]
GO:1903561	extracellular vesicle	GO_CellularComponent-EBI-UniProt-GOA_26.01.2019_00h00	0.00671837	0.00806205	[Alb, Aqp1, Arc, Sdc1]
GO:0043230	extracellular organelle	GO_CellularComponent-EBI-UniProt-GOA_26.01.2019_00h00	0.00896118	0.0103054	[Alb, Aqp1, Arc, Sdc1]
GO:0032590	dendrite membrane	GO_CellularComponent-EBI-UniProt-GOA_26.01.2019_00h00	0.00986011	0.0111991	[Akap5, Ddn, Lamp5]
GO:0005913	cell-cell adherens junction	GO_CellularComponent-EBI-UniProt-GOA_26.01.2019_00h00	0.0100553	0.011374	[Cdh1, Des, Lmo7, Nrap]
GO:0014704	intercalated disc	GO_CellularComponent-EBI-UniProt-GOA_26.01.2019_00h00	0.0164536	0.0174662	[Des, Myh4, Nrap]
GO:0030285	integral component of synaptic vesicle membrane	GO_CellularComponent-EBI-UniProt-GOA_26.01.2019_00h00	0.0222319	0.0229813	[Slc17a7, Slc30a3, Wfs1]
GO:0070062	extracellular exosome	GO_CellularComponent-EBI-UniProt-GOA_26.01.2019_00h00	0.0279552	0.0282624	[Alb, Aqp1, Sdc1]
GO:0016454	C-palmitoyltransferase activity	GO_MolecularFunction-EBI-UniProt-GOA_26.01.2019_00h00	7.62411e-06	4.57447e-05	[Sptlc1, Sptlc3, Sptssa]
GO:0004758	serine C-palmitoyltransferase activity	GO_MolecularFunction-EBI-UniProt-GOA_26.01.2019_00h00	7.62411e-06	4.57447e-05	[Sptlc1, Sptlc3, Sptssa]
GO:0030170	pyridoxal phosphate binding	GO_MolecularFunction-EBI-UniProt-GOA_26.01.2019_00h00	1.13042e-05	6.23991e-05	[Alas1, Alb, Amacr, Mocos, Sptlc1, Sptlc3]
GO:0070279	vitamin B6 binding	GO_MolecularFunction-EBI-UniProt-GOA_26.01.2019_00h00	1.3936e-05	7.25725e-05	[Alas1, Alb, Amacr, Mocos, Sptlc1, Sptlc3]
GO:0016747	transferase activity, transferring acyl groups other than amino-acyl groups	GO_MolecularFunction-EBI-UniProt-GOA_26.01.2019_00h00	6.54459e-05	0.000215036	[Abhd5, Alas1, Cers2, Elovl1, Elovl5, Mogat1, Pnpla3, Sptlc1, Sptlc3, Sptssa]
GO:0033293	monocarboxylic acid binding	GO_MolecularFunction-EBI-UniProt-GOA_26.01.2019_00h00	7.26483e-05	0.00023315	[Acacb, Alb, Cd36, Fabp4, Snca, Ugt1a2]
GO:0019842	vitamin binding	GO_MolecularFunction-EBI-UniProt-GOA_26.01.2019_00h00	0.000259859	0.000578395	[Acacb, Alas1, Alb, Amacr, Mocos, Sptlc1, Sptlc3]
GO:0051015	actin filament binding	GO_MolecularFunction-EBI-UniProt-GOA_26.01.2019_00h00	0.000365088	0.000757626	[Actn3, Mybpc2, Myh4, Neb, Nrap, Tnnc2, Tpm2, Wipf3]
GO:0042805	actinin binding	GO_MolecularFunction-EBI-UniProt-GOA_26.01.2019_00h00	0.000494364	0.000967691	[Adora2a, Lmo7, Mybpc2, Nrap]
GO:0016408	C-acyltransferase activity	GO_MolecularFunction-EBI-UniProt-GOA_26.01.2019_00h00	0.000569456	0.00106918	[Sptlc1, Sptlc3, Sptssa]
GO:0005504	fatty acid binding	GO_MolecularFunction-EBI-UniProt-GOA_26.01.2019_00h00	0.000653366	0.00119423	[Alb, Cd36, Fabp4, Snca]
GO:0032794	GTPase activating protein binding	GO_MolecularFunction-EBI-UniProt-GOA_26.01.2019_00h00	0.000671657	0.00120375	[Camk2a, Cdh1, Rgs14]
GO:0036041	long-chain fatty acid binding	GO_MolecularFunction-EBI-UniProt-GOA_26.01.2019_00h00	0.000784844	0.00134545	[Cd36, Fabp4, Snca]
GO:0016997	alpha-sialidase activity	GO_MolecularFunction-EBI-UniProt-GOA_26.01.2019_00h00	0.000784844	0.00134545	[Hspa1a, Hspa1b, Neu2]
GO:0004308	exo-alpha-sialidase activity	GO_MolecularFunction-EBI-UniProt-GOA_26.01.2019_00h00	0.000784844	0.00134545	[Hspa1a, Hspa1b, Neu2]
GO:0048156	tau protein binding	GO_MolecularFunction-EBI-UniProt-GOA_26.01.2019_00h00	0.00119473	0.00191712	[Hspa1a, Hspa1b, Snca]
GO:0004683	calmodulin-dependent protein kinase activity	GO_MolecularFunction-EBI-UniProt-GOA_26.01.2019_00h00	0.00192054	0.00286524	[Camk2a, Itpka, Ptk2b]
GO:0016836	hydro-lyase activity	GO_MolecularFunction-EBI-UniProt-GOA_26.01.2019_00h00	0.00201771	0.00299402	[Car12, Car3, Eno3, Hacd2]
GO:0051393	alpha-actinin binding	GO_MolecularFunction-EBI-UniProt-GOA_26.01.2019_00h00	0.00261229	0.00367854	[Adora2a, Mybpc2, Nrap]
GO:0004553	hydrolase activity, hydrolyzing O-glycosyl compounds	GO_MolecularFunction-EBI-UniProt-GOA_26.01.2019_00h00	0.0038326	0.00503713	[Acer3, Glb1l2, Hspa1a, Hspa1b, Neu2]
GO:0019212	phosphatase inhibitor activity	GO_MolecularFunction-EBI-UniProt-GOA_26.01.2019_00h00	0.00407158	0.00527585	[Arpp21, Ppp1r1b, Tesc]
GO:0035254	glutamate receptor binding	GO_MolecularFunction-EBI-UniProt-GOA_26.01.2019_00h00	0.00442837	0.0056324	[Adora2a, Akap5, Camk2a, Homer1]
GO:0097110	scaffold protein binding	GO_MolecularFunction-EBI-UniProt-GOA_26.01.2019_00h00	0.00442837	0.0056324	[Akap5, Baiap2, Homer1, Krt8]
GO:0016835	carbon-oxygen lyase activity	GO_MolecularFunction-EBI-UniProt-GOA_26.01.2019_00h00	0.00465192	0.00586269	[Car12, Car3, Eno3, Hacd2]
GO:0030594	neurotransmitter receptor activity	GO_MolecularFunction-EBI-UniProt-GOA_26.01.2019_00h00	0.00550282	0.00678026	[Chrm1, Drd1, Gabrd, Ptk2b, Srl]
GO:0001965	G-protein alpha-subunit binding	GO_MolecularFunction-EBI-UniProt-GOA_26.01.2019_00h00	0.00553429	0.00678872	[Drd1, Rgs14, Srl]
GO:0016409	palmitoyltransferase activity	GO_MolecularFunction-EBI-UniProt-GOA_26.01.2019_00h00	0.00553429	0.00678872	[Sptlc1, Sptlc3, Sptssa]
GO:0099589	serotonin receptor activity	GO_MolecularFunction-EBI-UniProt-GOA_26.01.2019_00h00	0.0082537	0.00965264	[Chrm1, Drd1, Srl]
GO:0004993	G protein-coupled serotonin receptor activity	GO_MolecularFunction-EBI-UniProt-GOA_26.01.2019_00h00	0.0082537	0.00965264	[Chrm1, Drd1, Srl]
GO:0004601	peroxidase activity	GO_MolecularFunction-EBI-UniProt-GOA_26.01.2019_00h00	0.011636	0.0128977	[Hbb, Mgst1, Ptgs2]
GO:0099528	G protein-coupled neurotransmitter receptor activity	GO_MolecularFunction-EBI-UniProt-GOA_26.01.2019_00h00	0.011636	0.0128977	[Chrm1, Drd1, Srl]
GO:0046915	transition metal ion transmembrane transporter activity	GO_MolecularFunction-EBI-UniProt-GOA_26.01.2019_00h00	0.0135842	0.0147029	[Slc30a3, Slc31a2, Slc39a4]
GO:0016684	oxidoreductase activity, acting on peroxide as acceptor	GO_MolecularFunction-EBI-UniProt-GOA_26.01.2019_00h00	0.0149799	0.016025	[Hbb, Mgst1, Ptgs2]
GO:0045296	cadherin binding	GO_MolecularFunction-EBI-UniProt-GOA_26.01.2019_00h00	0.0149799	0.016025	[Akap5, Cdh1, Epcam]
GO:0005548	phospholipid transporter activity	GO_MolecularFunction-EBI-UniProt-GOA_26.01.2019_00h00	0.0231364	0.023827	[Ano3, Atp11a, Tmem30b]
GO:0048306	calcium-dependent protein binding	GO_MolecularFunction-EBI-UniProt-GOA_26.01.2019_00h00	0.0250047	0.0255603	[Tnnc2, Tnnt3, Wfs1]
GO:0005230	extracellular ligand-gated ion channel activity	GO_MolecularFunction-EBI-UniProt-GOA_26.01.2019_00h00	0.026952	0.0273483	[Gabrd, Ptk2b, Slc17a7]
GO:0005254	chloride channel activity	GO_MolecularFunction-EBI-UniProt-GOA_26.01.2019_00h00	0.026952	0.0273483	[Ano1, Gabrd, Slc17a7]

## Sheet: KEGG EGK vs. GK
GOID	GOTerm	Term PValue	Term PValue Corrected with Benjamini-Hochberg	Group PValue	Group PValue Corrected with Benjamini-Hochberg	GOLevels	GOGroups	% Associated Genes	Nr. Genes	Associated Genes Found
KEGG:00600	Sphingolipid metabolism	1.10769e-07	2.21539e-06	0.000448209	0.00291336	[-1]	Group08	16.3265	8	[Acer3, Cers2, Kdsr, Neu2, Sgpp1, Sphk1, Sptlc1, Sptlc3]
KEGG:03320	PPAR signaling pathway	5.86051e-05	0.000586051	5.86051e-05	0.000761866	[-1]	Group01	8.53659	7	[Acsl5, Cd36, Fabp4, LOC681458, Lpl, Plin2, Plin4]
KEGG:04923	Regulation of lipolysis in adipocytes	0.000670006	0.00335003	0.000670006	0.00290336	[-1]	Group00	8.62069	5	[Abhd5, Cga, Fabp4, Ptgs2, Tshb]
KEGG:01040	Biosynthesis of unsaturated fatty acids	0.000649048	0.00432699	0.00248306	0.00806996	[-1]	Group09	12.1212	4	[Elovl1, Elovl5, Hacd2, LOC681458]
KEGG:05031	Amphetamine addiction	0.00121004	0.00484016	0.00284604	0.00616642	[-1]	Group10	7.57576	5	[Arc, Camk2a, Drd1, Fosb, Ppp1r1b]
KEGG:04020	Calcium signaling pathway	0.00254994	0.00849981	0.00254994	0.00662985	[-1]	Group02	4.10256	8	[Adora2a, Camk2a, Chrm1, Drd1, Itpka, Ptk2b, Sphk1, Tnnc2]
KEGG:05032	Morphine addiction	0.00543379	0.0155251	0.00543379	0.0100913	[-1]	Group03	5.37634	5	[Drd1, Gabrd, Gng7, Pde10a, Pde2a]
KEGG:00561	Glycerolipid metabolism	0.0067575	0.0168938	0.0067575	0.0109809	[-1]	Group07	6.45161	4	[Aldh3a2, Lpl, Mogat1, Pnpla3]
KEGG:00062	Fatty acid elongation	0.00799787	0.017773	0.00248306	0.00806996	[-1]	Group09	8.82353	3	[Elovl1, Elovl5, Hacd2]
KEGG:00980	Metabolism of xenobiotics by cytochrome P450	0.0124773	0.0226859	0.00865809	0.0125061	[-1]	Group11	5.40541	4	[Adh6, Akr7a3, Mgst1, Ugt1a2]
KEGG:00010	Glycolysis / Gluconeogenesis	0.0113635	0.022727	0.0104883	0.0136348	[-1]	Group12	5.55556	4	[Adh6, Aldh3a2, Eno3, Pgam2]
KEGG:05030	Cocaine addiction	0.0193433	0.0297589	0.00284604	0.00616642	[-1]	Group10	6.38298	3	[Drd1, Fosb, Ppp1r1b]
KEGG:00071	Fatty acid degradation	0.0193433	0.0297589	0.0104883	0.0136348	[-1]	Group12	6.38298	3	[Acsl5, Adh6, Aldh3a2]
KEGG:04071	Sphingolipid signaling pathway	0.0180908	0.0301514	0.000448209	0.00291336	[-1]	Group08	4	5	[Cers2, Sgpp1, Sphk1, Sptlc1, Sptlc3]
KEGG:05204	Chemical carcinogenesis	0.0284756	0.0406794	0.00865809	0.0125061	[-1]	Group11	4.21053	4	[Adh6, Mgst1, Ptgs2, Ugt1a2]
KEGG:00280	Valine, leucine and isoleucine degradation	0.0305806	0.0407741	0.0305806	0.0361407	[-1]	Group06	5.35714	3	[Aacs, Aldh3a2, Mcee]
KEGG:05134	Legionellosis	0.0334557	0.0418196	0.0334557	0.0362436	[-1]	Group04	5.17241	3	[C3, Hspa1a, Hspa1b]
KEGG:05144	Malaria	0.0364667	0.042902	0.0364667	0.0364667	[-1]	Group05	5	3	[Cd36, Hbb, Sdc1]

## Sheet: GO EW vs. W
GOID	GOTerm	Ontology Source	Term PValue	Term PValue Corrected with Benjamini-Hochberg	Associated Genes Found
GO:0001228	DNA-binding transcription activator activity, RNA polymerase II-specific	GO_MolecularFunction-EBI-UniProt-GOA_26.01.2019_00h00	4.03845e-10	2.8673e-08	[Ebf3, Egr2, Fos, Fosb, Foxa1, Foxa2, Irf2bp1, Kcnh8, Lmx1a, Meis2, Nr4a1, Nr4a2, Six1, Six6, Tfap2b]
GO:0070405	ammonium ion binding	GO_MolecularFunction-EBI-UniProt-GOA_26.01.2019_00h00	5.91492e-09	2.0998e-07	[Chat, Chrna5, Chrna6, Chrnb3, Drd1, Rasgrp1, Slc6a3, Th]
GO:0098700	neurotransmitter loading into synaptic vesicle	GO_BiologicalProcess-EBI-UniProt-GOA_26.01.2019_00h00	1.11343e-07	2.63512e-06	[Ddc, Slc17a7, Slc18a3, Th]
GO:0007519	skeletal muscle tissue development	GO_BiologicalProcess-EBI-UniProt-GOA_26.01.2019_00h00	2.48535e-07	4.4115e-06	[Acta1, Actn3, Atf3, Btg2, Egr2, Fos, Mylpf, Nr4a1, Six1]
GO:0060538	skeletal muscle organ development	GO_BiologicalProcess-EBI-UniProt-GOA_26.01.2019_00h00	3.43324e-07	4.8752e-06	[Acta1, Actn3, Atf3, Btg2, Egr2, Fos, Mylpf, Nr4a1, Six1]
GO:0035914	skeletal muscle cell differentiation	GO_BiologicalProcess-EBI-UniProt-GOA_26.01.2019_00h00	1.01348e-06	1.19928e-05	[Atf3, Btg2, Egr2, Fos, Nr4a1, Six1]
GO:0099504	synaptic vesicle cycle	GO_BiologicalProcess-EBI-UniProt-GOA_26.01.2019_00h00	1.33815e-06	1.35727e-05	[Chrna5, Chrna6, Chrnb3, Ddc, Drd1, Otof, Slc17a7, Slc18a3, Th]
GO:0042417	dopamine metabolic process	GO_BiologicalProcess-EBI-UniProt-GOA_26.01.2019_00h00	2.11555e-06	1.87755e-05	[Ddc, Drd1, Nr4a2, Slc6a3, Th]
GO:0035094	response to nicotine	GO_BiologicalProcess-EBI-UniProt-GOA_26.01.2019_00h00	2.46484e-06	1.94449e-05	[Chrna5, Chrna6, Chrnb3, Drd1, Slc6a3, Th]
GO:0042416	dopamine biosynthetic process	GO_BiologicalProcess-EBI-UniProt-GOA_26.01.2019_00h00	2.47409e-06	1.7566e-05	[Ddc, Nr4a2, Slc6a3, Th]
GO:0006584	catecholamine metabolic process	GO_BiologicalProcess-EBI-UniProt-GOA_26.01.2019_00h00	7.98368e-06	5.1531e-05	[Ddc, Drd1, Nr4a2, Slc6a3, Th]
GO:0009712	catechol-containing compound metabolic process	GO_BiologicalProcess-EBI-UniProt-GOA_26.01.2019_00h00	7.98368e-06	5.1531e-05	[Ddc, Drd1, Nr4a2, Slc6a3, Th]
GO:0042423	catecholamine biosynthetic process	GO_BiologicalProcess-EBI-UniProt-GOA_26.01.2019_00h00	1.17255e-05	6.93756e-05	[Ddc, Nr4a2, Slc6a3, Th]
GO:0009713	catechol-containing compound biosynthetic process	GO_BiologicalProcess-EBI-UniProt-GOA_26.01.2019_00h00	1.17255e-05	6.93756e-05	[Ddc, Nr4a2, Slc6a3, Th]
GO:0007612	learning	GO_BiologicalProcess-EBI-UniProt-GOA_26.01.2019_00h00	1.21782e-05	6.65116e-05	[Btg2, Drd1, En1, Fos, Meis2, Sgk1, Th]
GO:0007613	memory	GO_BiologicalProcess-EBI-UniProt-GOA_26.01.2019_00h00	1.26923e-05	6.43681e-05	[Chat, Drd1, Lmx1a, Oxt, Sgk1, Slc17a7, Th]
GO:0018958	phenol-containing compound metabolic process	GO_BiologicalProcess-EBI-UniProt-GOA_26.01.2019_00h00	1.28852e-05	6.09901e-05	[Cga, Ddc, Drd1, Nr4a2, Slc6a3, Th]
GO:0043524	negative regulation of neuron apoptotic process	GO_BiologicalProcess-EBI-UniProt-GOA_26.01.2019_00h00	1.49321e-05	6.62614e-05	[Btg2, En1, En2, Mt2A, Nr4a2, Six1, Tfap2b]
GO:0007274	neuromuscular synaptic transmission	GO_BiologicalProcess-EBI-UniProt-GOA_26.01.2019_00h00	1.75541e-05	7.33143e-05	[Chat, Chrna5, Chrna6, Chrnb3]
GO:0005231	excitatory extracellular ligand-gated ion channel activity	GO_MolecularFunction-EBI-UniProt-GOA_26.01.2019_00h00	2.24696e-05	8.86301e-05	[Chrna5, Chrna6, Chrnb3, Slc17a7]
GO:0005230	extracellular ligand-gated ion channel activity	GO_MolecularFunction-EBI-UniProt-GOA_26.01.2019_00h00	2.39652e-05	8.95541e-05	[Chrna5, Chrna6, Chrnb3, Gabrd, Slc17a7]
GO:0021954	central nervous system neuron development	GO_BiologicalProcess-EBI-UniProt-GOA_26.01.2019_00h00	3.14085e-05	0.0001115	[Ascl1, Btg2, Drd1, Foxg1, Nr4a2]
GO:0005179	hormone activity	GO_MolecularFunction-EBI-UniProt-GOA_26.01.2019_00h00	3.96764e-05	0.000134144	[Cga, Lhb, Oxt, Pomc, Postn, Tshb]
GO:0005892	acetylcholine-gated channel complex	GO_CellularComponent-EBI-UniProt-GOA_26.01.2019_00h00	4.98012e-05	0.000160722	[Chrna5, Chrna6, Chrnb3]
GO:0035270	endocrine system development	GO_BiologicalProcess-EBI-UniProt-GOA_26.01.2019_00h00	5.57136e-05	0.000171985	[Ascl1, Cga, Foxa2, Kcnh8, Six1, Slc6a3]
GO:0042166	acetylcholine binding	GO_MolecularFunction-EBI-UniProt-GOA_26.01.2019_00h00	6.10761e-05	0.000180683	[Chrna5, Chrna6, Chrnb3]
GO:0022848	acetylcholine-gated cation-selective channel activity	GO_MolecularFunction-EBI-UniProt-GOA_26.01.2019_00h00	6.10761e-05	0.000180683	[Chrna5, Chrna6, Chrnb3]
GO:0048483	autonomic nervous system development	GO_BiologicalProcess-EBI-UniProt-GOA_26.01.2019_00h00	6.33532e-05	0.000179923	[Ascl1, Egr2, Six1, Tfap2b]
GO:0001708	cell fate specification	GO_BiologicalProcess-EBI-UniProt-GOA_26.01.2019_00h00	7.23702e-05	0.000197626	[Ascl1, Foxa1, Foxa2, Mylpf, Six1]
GO:0035240	dopamine binding	GO_MolecularFunction-EBI-UniProt-GOA_26.01.2019_00h00	7.39004e-05	0.000194331	[Drd1, Slc6a3, Th]
GO:0046189	phenol-containing compound biosynthetic process	GO_BiologicalProcess-EBI-UniProt-GOA_26.01.2019_00h00	7.55879e-05	0.000191669	[Ddc, Nr4a2, Slc6a3, Th]
GO:0008306	associative learning	GO_BiologicalProcess-EBI-UniProt-GOA_26.01.2019_00h00	0.000104187	0.000255078	[Btg2, Drd1, Fos, Meis2, Sgk1]
GO:0021542	dentate gyrus development	GO_BiologicalProcess-EBI-UniProt-GOA_26.01.2019_00h00	0.000104562	0.000247463	[Btg2, Drd1, Lmx1a]
GO:1904315	transmitter-gated ion channel activity involved in regulation of postsynaptic membrane potential	GO_MolecularFunction-EBI-UniProt-GOA_26.01.2019_00h00	0.00010509	0.000240691	[Chrna5, Chrna6, Chrnb3, Gabrd]
GO:0001975	response to amphetamine	GO_BiologicalProcess-EBI-UniProt-GOA_26.01.2019_00h00	0.00013213	0.000293163	[Drd1, Nr4a2, Oxt, Th]
GO:0099529	neurotransmitter receptor activity involved in regulation of postsynaptic membrane potential	GO_MolecularFunction-EBI-UniProt-GOA_26.01.2019_00h00	0.00013213	0.000293163	[Chrna5, Chrna6, Chrnb3, Gabrd]
GO:0050881	musculoskeletal movement	GO_BiologicalProcess-EBI-UniProt-GOA_26.01.2019_00h00	0.000152745	0.000328634	[Actn3, Ascl1, Tnnc2, Tnnt3]
GO:0035176	social behavior	GO_BiologicalProcess-EBI-UniProt-GOA_26.01.2019_00h00	0.000152745	0.000328634	[Drd1, En1, Oxt, Th]
GO:0098960	postsynaptic neurotransmitter receptor activity	GO_MolecularFunction-EBI-UniProt-GOA_26.01.2019_00h00	0.000152745	0.000328634	[Chrna5, Chrna6, Chrnb3, Gabrd]
GO:0015464	acetylcholine receptor activity	GO_MolecularFunction-EBI-UniProt-GOA_26.01.2019_00h00	0.000164414	0.000343335	[Chrna5, Chrna6, Chrnb3]
GO:1901338	catecholamine binding	GO_MolecularFunction-EBI-UniProt-GOA_26.01.2019_00h00	0.000164414	0.000343335	[Drd1, Slc6a3, Th]
GO:0022835	transmitter-gated channel activity	GO_MolecularFunction-EBI-UniProt-GOA_26.01.2019_00h00	0.000187894	0.000381157	[Chrna5, Chrna6, Chrnb3, Gabrd]
GO:0022824	transmitter-gated ion channel activity	GO_MolecularFunction-EBI-UniProt-GOA_26.01.2019_00h00	0.000187894	0.000381157	[Chrna5, Chrna6, Chrnb3, Gabrd]
GO:0042053	regulation of dopamine metabolic process	GO_BiologicalProcess-EBI-UniProt-GOA_26.01.2019_00h00	0.000188405	0.000371577	[Drd1, Nr4a2, Slc6a3]
GO:0042069	regulation of catecholamine metabolic process	GO_BiologicalProcess-EBI-UniProt-GOA_26.01.2019_00h00	0.000214557	0.000411717	[Drd1, Nr4a2, Slc6a3]
GO:0005865	striated muscle thin filament	GO_CellularComponent-EBI-UniProt-GOA_26.01.2019_00h00	0.000214557	0.000411717	[Acta1, Tnnc2, Tnnt3]
GO:0036379	myofilament	GO_CellularComponent-EBI-UniProt-GOA_26.01.2019_00h00	0.00024295	0.000453932	[Acta1, Tnnc2, Tnnt3]
GO:0048747	muscle fiber development	GO_BiologicalProcess-EBI-UniProt-GOA_26.01.2019_00h00	0.000275145	0.000500905	[Acta1, Actn3, Mylpf, Six1]
GO:0030594	neurotransmitter receptor activity	GO_MolecularFunction-EBI-UniProt-GOA_26.01.2019_00h00	0.000335961	0.00059633	[Chrna5, Chrna6, Chrnb3, Drd1, Gabrd]
GO:0007617	mating behavior	GO_BiologicalProcess-EBI-UniProt-GOA_26.01.2019_00h00	0.000421314	0.000729593	[Drd1, Oxt, Th]
GO:0048741	skeletal muscle fiber development	GO_BiologicalProcess-EBI-UniProt-GOA_26.01.2019_00h00	0.000421314	0.000729593	[Acta1, Actn3, Six1]
GO:0008593	regulation of Notch signaling pathway	GO_BiologicalProcess-EBI-UniProt-GOA_26.01.2019_00h00	0.000505161	0.000853963	[Ascl1, Dlk1, Llgl2, Postn]
GO:0014904	myotube cell development	GO_BiologicalProcess-EBI-UniProt-GOA_26.01.2019_00h00	0.000560187	0.000924961	[Acta1, Actn3, Six1]
GO:0009953	dorsal/ventral pattern formation	GO_BiologicalProcess-EBI-UniProt-GOA_26.01.2019_00h00	0.000586248	0.00094599	[Ascl1, En1, Foxa1, Foxg1]
GO:0014075	response to amine	GO_BiologicalProcess-EBI-UniProt-GOA_26.01.2019_00h00	0.000586248	0.00094599	[Drd1, Nr4a2, Oxt, Th]
GO:0007271	synaptic transmission, cholinergic	GO_BiologicalProcess-EBI-UniProt-GOA_26.01.2019_00h00	0.000612225	0.000965955	[Chrna5, Chrna6, Chrnb3]
GO:0048663	neuron fate commitment	GO_BiologicalProcess-EBI-UniProt-GOA_26.01.2019_00h00	0.000615215	0.000949571	[Ascl1, Foxa1, Foxg1, Six1]
GO:0097366	response to bronchodilator	GO_BiologicalProcess-EBI-UniProt-GOA_26.01.2019_00h00	0.000615215	0.000949571	[Drd1, Nr4a2, Oxt, Th]
GO:0033238	regulation of cellular amine metabolic process	GO_BiologicalProcess-EBI-UniProt-GOA_26.01.2019_00h00	0.000725335	0.00109572	[Drd1, Nr4a2, Slc6a3]
GO:0071542	dopaminergic neuron differentiation	GO_BiologicalProcess-EBI-UniProt-GOA_26.01.2019_00h00	0.000786544	0.00116343	[Foxa2, Lmx1a, Nr4a2]
GO:0008344	adult locomotory behavior	GO_BiologicalProcess-EBI-UniProt-GOA_26.01.2019_00h00	0.000847116	0.00122745	[Drd1, En1, Foxa2, Nr4a2]
GO:0060428	lung epithelium development	GO_BiologicalProcess-EBI-UniProt-GOA_26.01.2019_00h00	0.000989565	0.00140518	[Ascl1, Errfi1, Foxa1]
GO:0004879	nuclear receptor activity	GO_MolecularFunction-EBI-UniProt-GOA_26.01.2019_00h00	0.000989565	0.00140518	[Nr4a1, Nr4a2, Rorc]
GO:0098531	transcription factor activity, direct ligand regulated sequence-specific DNA binding	GO_MolecularFunction-EBI-UniProt-GOA_26.01.2019_00h00	0.000989565	0.00140518	[Nr4a1, Nr4a2, Rorc]
GO:0001709	cell fate determination	GO_BiologicalProcess-EBI-UniProt-GOA_26.01.2019_00h00	0.00106391	0.00148114	[Ascl1, Atf3, Foxg1]
GO:0019098	reproductive behavior	GO_BiologicalProcess-EBI-UniProt-GOA_26.01.2019_00h00	0.00106391	0.00148114	[Drd1, Oxt, Th]
GO:0042745	circadian sleep/wake cycle	GO_BiologicalProcess-EBI-UniProt-GOA_26.01.2019_00h00	0.00114171	0.00155887	[Drd1, Mt2A, Th]
GO:0014888	striated muscle adaptation	GO_BiologicalProcess-EBI-UniProt-GOA_26.01.2019_00h00	0.00114171	0.00155887	[Acta1, Actn3, Errfi1]
GO:0003009	skeletal muscle contraction	GO_BiologicalProcess-EBI-UniProt-GOA_26.01.2019_00h00	0.001223	0.00163836	[Actn3, Tnnc2, Tnnt3]
GO:0051937	catecholamine transport	GO_BiologicalProcess-EBI-UniProt-GOA_26.01.2019_00h00	0.0012281	0.00161473	[Chrna6, Drd1, Oxt, Slc6a3]
GO:2000300	regulation of synaptic vesicle exocytosis	GO_BiologicalProcess-EBI-UniProt-GOA_26.01.2019_00h00	0.00143071	0.00184692	[Chrna5, Chrna6, Chrnb3, Drd1]
GO:0048665	neuron fate specification	GO_BiologicalProcess-EBI-UniProt-GOA_26.01.2019_00h00	0.00158434	0.00200871	[Ascl1, Foxa1, Six1]
GO:0051412	response to corticosterone	GO_BiologicalProcess-EBI-UniProt-GOA_26.01.2019_00h00	0.00200621	0.00249896	[Fos, Fosb, Th]
GO:0042755	eating behavior	GO_BiologicalProcess-EBI-UniProt-GOA_26.01.2019_00h00	0.00212153	0.00259705	[Drd1, Oxt, Th]
GO:0030901	midbrain development	GO_BiologicalProcess-EBI-UniProt-GOA_26.01.2019_00h00	0.00212153	0.00259705	[En1, En2, Lmx1a]
GO:0007618	mating	GO_BiologicalProcess-EBI-UniProt-GOA_26.01.2019_00h00	0.0022409	0.00269667	[Drd1, Oxt, Th]
GO:0055078	sodium ion homeostasis	GO_BiologicalProcess-EBI-UniProt-GOA_26.01.2019_00h00	0.00236435	0.00279782	[Oxt, Sgk1, Tfap2b]
GO:0016459	myosin complex	GO_CellularComponent-EBI-UniProt-GOA_26.01.2019_00h00	0.00262372	0.00305384	[Myh4, Mylpf, Myo15a]
GO:0017085	response to insecticide	GO_BiologicalProcess-EBI-UniProt-GOA_26.01.2019_00h00	0.00275973	0.00316033	[Ddc, Nr4a2, Th]
GO:0008542	visual learning	GO_BiologicalProcess-EBI-UniProt-GOA_26.01.2019_00h00	0.00275973	0.00316033	[Drd1, Meis2, Sgk1]
GO:0021879	forebrain neuron differentiation	GO_BiologicalProcess-EBI-UniProt-GOA_26.01.2019_00h00	0.00290001	0.00326827	[Ascl1, Drd1, Foxg1]
GO:0007632	visual behavior	GO_BiologicalProcess-EBI-UniProt-GOA_26.01.2019_00h00	0.00290001	0.00326827	[Drd1, Meis2, Sgk1]
GO:0048512	circadian behavior	GO_BiologicalProcess-EBI-UniProt-GOA_26.01.2019_00h00	0.00304461	0.00337762	[Drd1, Mt2A, Th]
GO:0007405	neuroblast proliferation	GO_BiologicalProcess-EBI-UniProt-GOA_26.01.2019_00h00	0.00304461	0.00337762	[Ascl1, Foxg1, Neurod4]
GO:0003707	steroid hormone receptor activity	GO_MolecularFunction-EBI-UniProt-GOA_26.01.2019_00h00	0.00304461	0.00337762	[Nr4a1, Nr4a2, Rorc]
GO:0015872	dopamine transport	GO_BiologicalProcess-EBI-UniProt-GOA_26.01.2019_00h00	0.00334694	0.00365588	[Chrna6, Drd1, Slc6a3]
GO:0003407	neural retina development	GO_BiologicalProcess-EBI-UniProt-GOA_26.01.2019_00h00	0.00366704	0.00394484	[Neurod4, Slc17a7, Tfap2b]
GO:0030239	myofibril assembly	GO_BiologicalProcess-EBI-UniProt-GOA_26.01.2019_00h00	0.00400523	0.00424434	[Acta1, Mylpf, Tnnt3]
GO:0070849	response to epidermal growth factor	GO_BiologicalProcess-EBI-UniProt-GOA_26.01.2019_00h00	0.00400523	0.00424434	[Ascl1, Errfi1, Zfp36]
GO:0021872	forebrain generation of neurons	GO_BiologicalProcess-EBI-UniProt-GOA_26.01.2019_00h00	0.00436181	0.00455424	[Ascl1, Drd1, Foxg1]
GO:0098900	regulation of action potential	GO_BiologicalProcess-EBI-UniProt-GOA_26.01.2019_00h00	0.00454709	0.00467889	[Dsp, Mt2A, Ptpn3]
GO:0070373	negative regulation of ERK1 and ERK2 cascade	GO_BiologicalProcess-EBI-UniProt-GOA_26.01.2019_00h00	0.00473707	0.00480474	[Atf3, Dusp1, Errfi1]
GO:0051385	response to mineralocorticoid	GO_BiologicalProcess-EBI-UniProt-GOA_26.01.2019_00h00	0.00554472	0.00554472	[Fos, Fosb, Th]

## Sheet: KEGG EW vs. W
GOID	GOTerm	Term PValue	Term PValue Corrected with Benjamini-Hochberg	Associated Genes Found
KEGG:05031	Amphetamine addiction	1.03229e-06	6.19375e-06	[Ddc, Drd1, Fos, Fosb, Slc6a3, Th]
KEGG:05030	Cocaine addiction	4.02699e-06	1.2081e-05	[Ddc, Drd1, Fosb, Slc6a3, Th]
KEGG:04728	Dopaminergic synapse	6.00056e-05	0.000120011	[Ddc, Drd1, Fos, Gng7, Slc6a3, Th]
KEGG:04725	Cholinergic synapse	0.000297307	0.000445961	[Chat, Chrna6, Fos, Gng7, Slc18a3]
KEGG:04917	Prolactin signaling pathway	0.000572099	0.000686519	[Cga, Fos, Lhb, Th]
KEGG:05033	Nicotine addiction	0.00114887	0.00114887	[Chrna6, Gabrd, Slc17a7]
