# Supplementary material for: Transcriptomic responses of hypothalamus to acute exercise in type 2 diabetic Goto-Kakizaki rats
Source: PeerJ. 2019 Sep 24;7:e7743. doi: 10.7717/peerj.7743 (PMC6764357; doi:10.7717/peerj.7743)
Supplement: Table S5 [file peerj-07-7743-s005.xlsx]

## Sheet: Sheet1
The differentially expressed genes referred to Rat Genome Database (RGD) as associated with type 2 diabetes (T2D) and related phenotypes
Ensembl ID	Gene	GK vs. W	EGK vs. GK	EW vs. W	Type 2 diabetes	Glucose intolerance	Hyperglycemia	Hyperinsulinemia	Insulin resistance
ENSRNOG00000000658	Acacb	-0.105088	-0.749498	-0.282271				√	√
ENSRNOG00000003977	Dusp1	-0.947664	-0.20888	-0.836039		√	√
ENSRNOG00000003745	Atf3	-2.56597	-0.00308317	-1.87405	√
ENSRNOG00000007607	Nr4a1	-1.28596	0.129576	-0.857995				√	√
ENSRNOG00000018577	Neil1	-0.623061	-0.212181	-0.178407		√	√	√	√
ENSRNOG00000002946	Socs3	-1.83345	-0.0499312	-0.674027	√			√	√
ENSRNOG00000012686	Pomc	0.185405	-0.245389	4.06693	√
ENSRNOG00000016793	Tshb	2.76886	-1.20238	4.40046			√
ENSRNOG00000017854	Ucp2	0.11484	-0.246851	0.590495	√			√	√
ENSRNOG00000009329	Nr1d1	-0.540709	-0.0202442	0.178361	√
ENSRNOG00000046834	C3	-1.93433	0.922109	-0.0528769	√			√	√
ENSRNOG00000053272	Chi3l1	-1.97974	-0.0435408	-0.0973886	√
ENSRNOG00000017286	Ephx2	-3.61841	0.0266413	0.0217607				√	√
ENSRNOG00000013133	Foxa2	-0.116371	-0.304404	-1.25614	√			√
ENSRNOG00000004327	Ddc	0.125263	-0.0144675	-0.735061				√
ENSRNOG00000020410	Th	0.520851	-0.0546394	-1.04316	√
ENSRNOG00000059947	Sdc1	1.23172	-1.28711	0.0847427			√
ENSRNOG00000001823	St6gal1	1.12934	-1.25918	0.105651	√
ENSRNOG00000007060	Plin2	1.48208	-1.38257	-0.0423357				√	√
ENSRNOG00000010626	Sphk1	3.15804	-3.40492	-0.397112	√
ENSRNOG00000018126	Abca1	0.502669	-0.200873	0.0656169	√			√	√
ENSRNOG00000014117	Hmox1	1.22571	-0.36736	0.127035	√			√	√
ENSRNOG00000009848	Il18	0.503573	-0.137744	-0.0463647				√	√
ENSRNOG00000019183	Alox15	2.32085	-0.51082	-0.0021228				√	√
ENSRNOG00000047321	Hba-a2	1.70141	-0.458326	-0.168388	√
ENSRNOG00000048273	Apod	0.648267	-0.0905308	-0.18178	√
ENSRNOG00000017601	Srd5a1	0.543392	-0.128929	-0.21326	√
ENSRNOG00000021147	Bad	3.33144	0.0638813	0.0187676	√			√	√
ENSRNOG00000002906	Nr1i2	1.7769	-0.0635549	0.236406				√	√
ENSRNOG00000031766	Mt-cyb	-0.671388	0.63641	-0.642646	√
ENSRNOG00000002525	Ptgs2	-0.810616	0.872389	-0.367564	√		√	√	√
ENSRNOG00000011823	Tfap2b	1.04426	0.457122	1.12077				√	√
ENSRNOG00000043098	Mt2A	-0.115762	1.06118	0.666931	√
ENSRNOG00000003891	Dio2	0.436139	0.880934	0.804245	√			√	√
ENSRNOG00000005108	Wfs1	-0.0856413	0.923518	0.300977	√
ENSRNOG00000023688	Drd1	0.371142	1.17331	0.76857			√	√	√
ENSRNOG00000027839	Ptk2b	0.0671519	0.704447	0.301788				√	√
ENSRNOG00000021139	Esrra	0.455004	0.163731	0.100929	√
ENSRNOG00000019321	Cck	0.454713	0.616734	-0.238826				√	√
ENSRNOG00000050647	Hspa1b	1.4561	0.736242	0.234522	√
ENSRNOG00000015139	F12	-0.426939	1.29051	-0.110873	√
ENSRNOG00000012181	Lpl	0.428519	1.02465	0.0924198	√			√	√
ENSRNOG00000006930	Casq1	-0.38611	1.86169	-0.673067	√
ENSRNOG00000040108	Cd36	0.154222	1.5047	-0.14228	√	√	√	√	√
ENSRNOG00000010805	Fabp4	-0.615683	4.86762	-0.225824				√	√
The rectangle filled with red indicates this gene with differential expression. The number in each rectangle indicates the value of log2 fold change.
